# Supplementary material
Source: PubMed Central journal article supplement (PMC2766517)
Supplement: NIHMS133976-supplement-1.pdf [file NIHMS133976-supplement-1.pdf]

## **SUPPLEMENTARY INFORMATION**

# **Splice Site Strength-Dependent Activity and Genetic Buffering by Poly-G Runs**

**Xinshu Xiao<sup>1,2</sup>, Zefeng Wang<sup>1,3</sup>, Minyoung Jang<sup>1</sup>, Razvan Nutiu<sup>1</sup>,  
Eric T. Wang<sup>1,4</sup> and Christopher B. Burge<sup>1,5</sup>**

<sup>1</sup>Department of Biology, Massachusetts Institute of Technology, Cambridge MA 02139

<sup>2</sup>Current address: Department of Physiological Science and the Molecular Biology  
Institute, University of California, Los Angeles, CA, 90095

<sup>3</sup>Current address: Department of Pharmacology, University of North Carolina at Chapel  
Hill, NC 27599

<sup>4</sup>Division of Health Sciences and Technology, Massachusetts Institute of Technology,  
Cambridge MA 02139

<sup>5</sup>Correspondence should be addressed to: [cburge@mit.edu](mailto:cburge@mit.edu). Phone: (617) 258-5997. Fax:  
(617) 452-2936.

Running head: Splicing Activity of G-Runs

**a**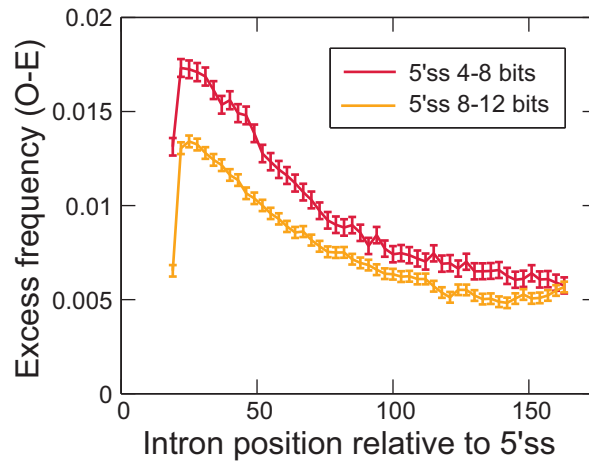**b**

| no. G's in G-run | [3,5]  | [6,8]  | [9,11] | [12,14] | [15,17] | [18,20] | $\geq 21$ |
|------------------|--------|--------|--------|---------|---------|---------|-----------|
| No. intron       | 20,869 | 11,061 | 6,765  | 4,534   | 3,025   | 1,649   | 1,583     |
| % total          | 22.9   | 12.2   | 7.4    | 5.0     | 3.3     | 1.8     | 1.7       |

**Supplementary Figure 1. Distribution of G-rich elements in human introns.** (a) Excess frequency of GGG in downstream introns of human constitutive exons with intermediate or strong 5'ss. Excess frequency is defined as the difference between the observed total frequency of GGG among all introns, calculated in a 30-nt window, and the mean frequency of GGG in 10 random permutations of the sequence in the same window, with an offset of 3nt between successive windows (see Yeo et al, PNAS, 2004 for details). Each point represents the center of a 30-nt window. Black bars show the standard errors.

(b) Number and percentage of human constitutive exons (N = 91,045) with different numbers of G's in runs of G<sub>3</sub> or longer.

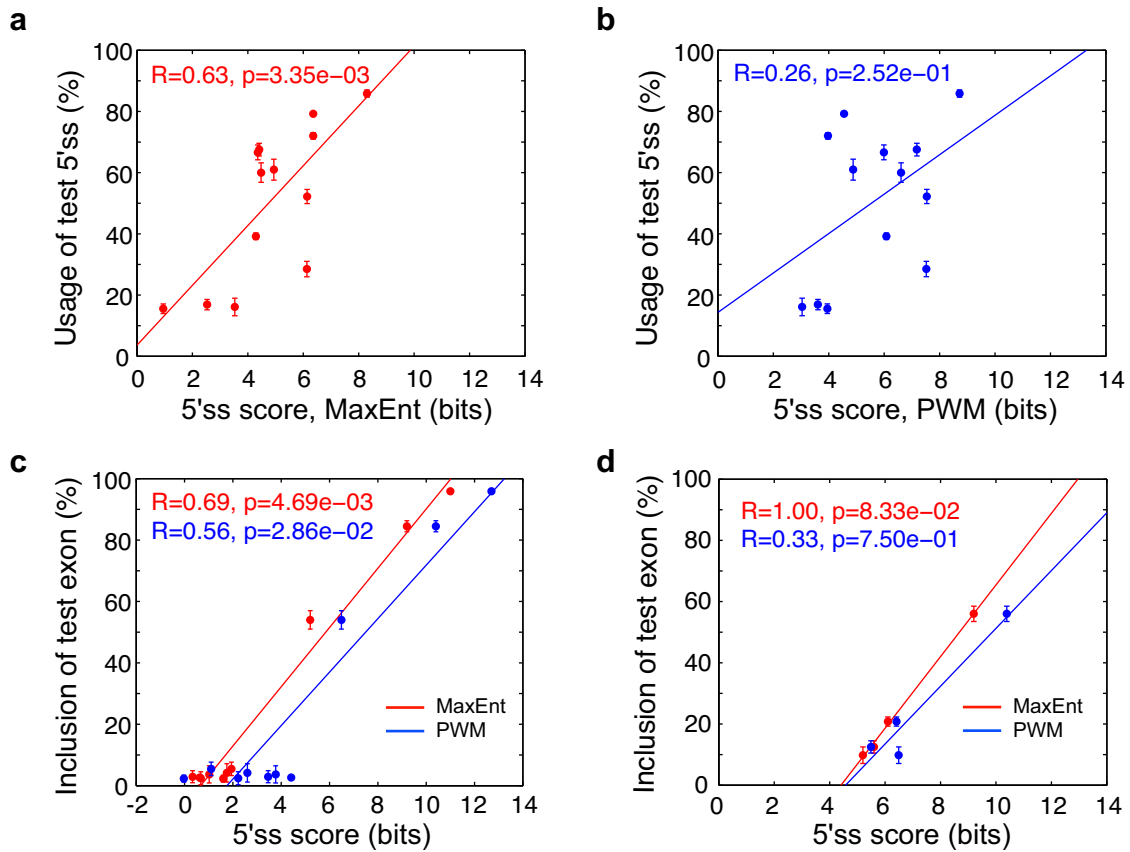

**Supplementary Figure 2. Correlation (Kendall's Tau) of splicing reporter assay results with 5'ss scores calculated using MaxEnt and positional weight matrix (PWM).** (a). Splicing reporter assays presented in Table 2 of Roca et al, RNA, 11(5): 683-98, 2005; 5'ss was scored by MaxEnt. (b). Same data as in (a), but 5'ss was scored by PWM. (c). Reporters presented in this paper that differ only in 5'ss sequence and with a 3'ss score of 4.1 bits. (d). Reporters presented in this paper that differ only in 5'ss sequence and with a 3'ss score of 2.1 bits.

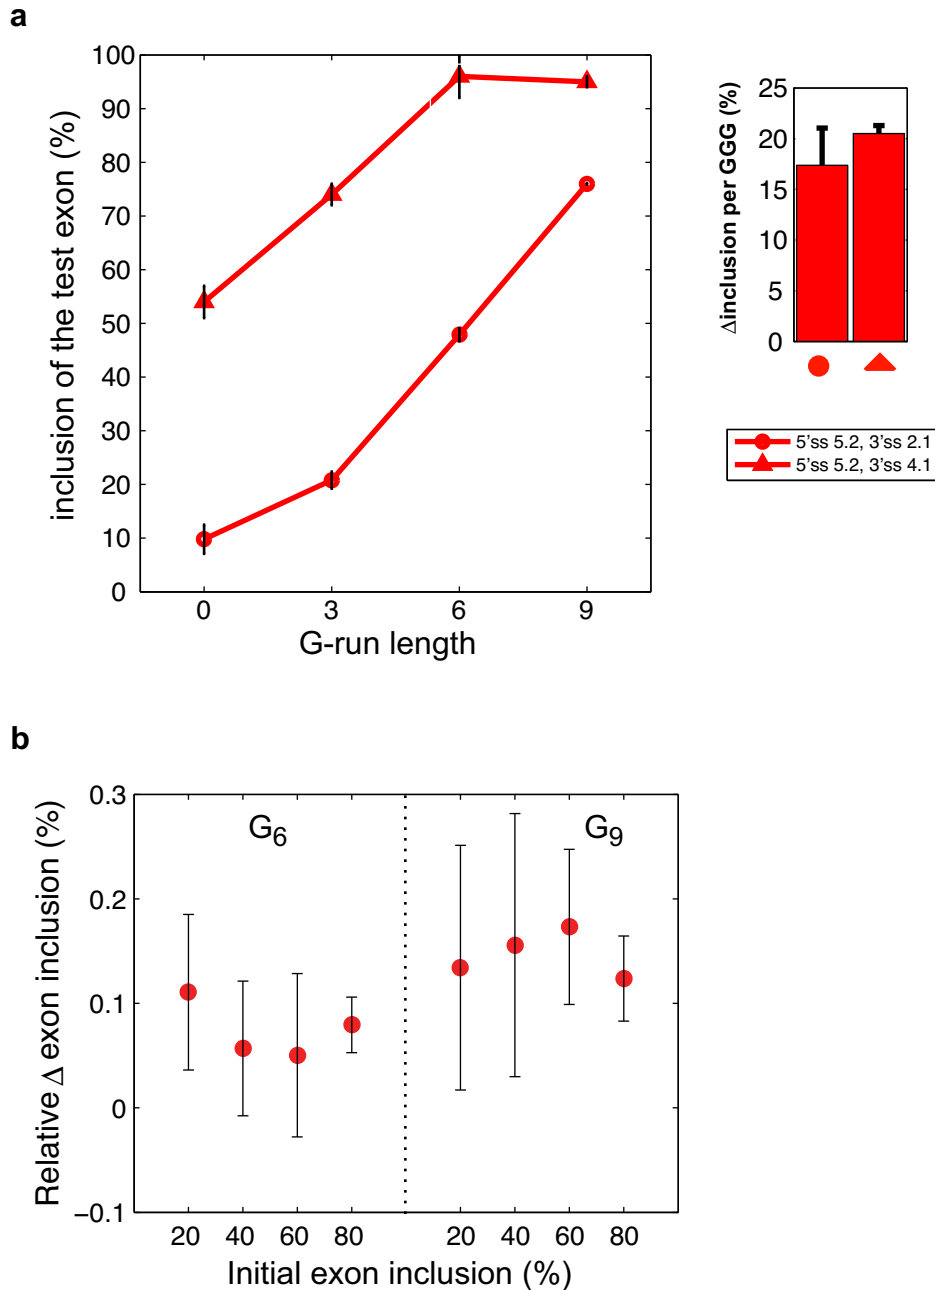

**Supplementary Figure 3. Activity of GGGs independent of initial inclusion level at G<sub>0</sub>.**

(a) Left: Inclusion of the middle exon in reporters with the same medium 5'ss and different 3'ss. Right: change in inclusion of the middle exon normalized by the number of GGGs (data at G<sub>9</sub> for the construct whose 3'ss is 4.1 bits was excluded due to saturation at G<sub>6</sub>). (b) Change in exon inclusion level in the mRNA-SEQ data (% , control-HKD) in exons with 6 or 9 G's in G-runs in the downstream intron relative to exons with no G-runs. Exons with exonic or upstream intronic G-runs have been excluded. Exons with or without G-runs are grouped correspondingly according to their inclusion level in the HKD experiments. Ranges of inclusion levels of the four groups are 10 to 30%, 30 to 50%, 50 to 70% and 70 to 90%. Exons with smaller than 10% or larger than 90% inclusion in the HKD experiment are excluded to allow a dynamic range for potential changes in inclusion.

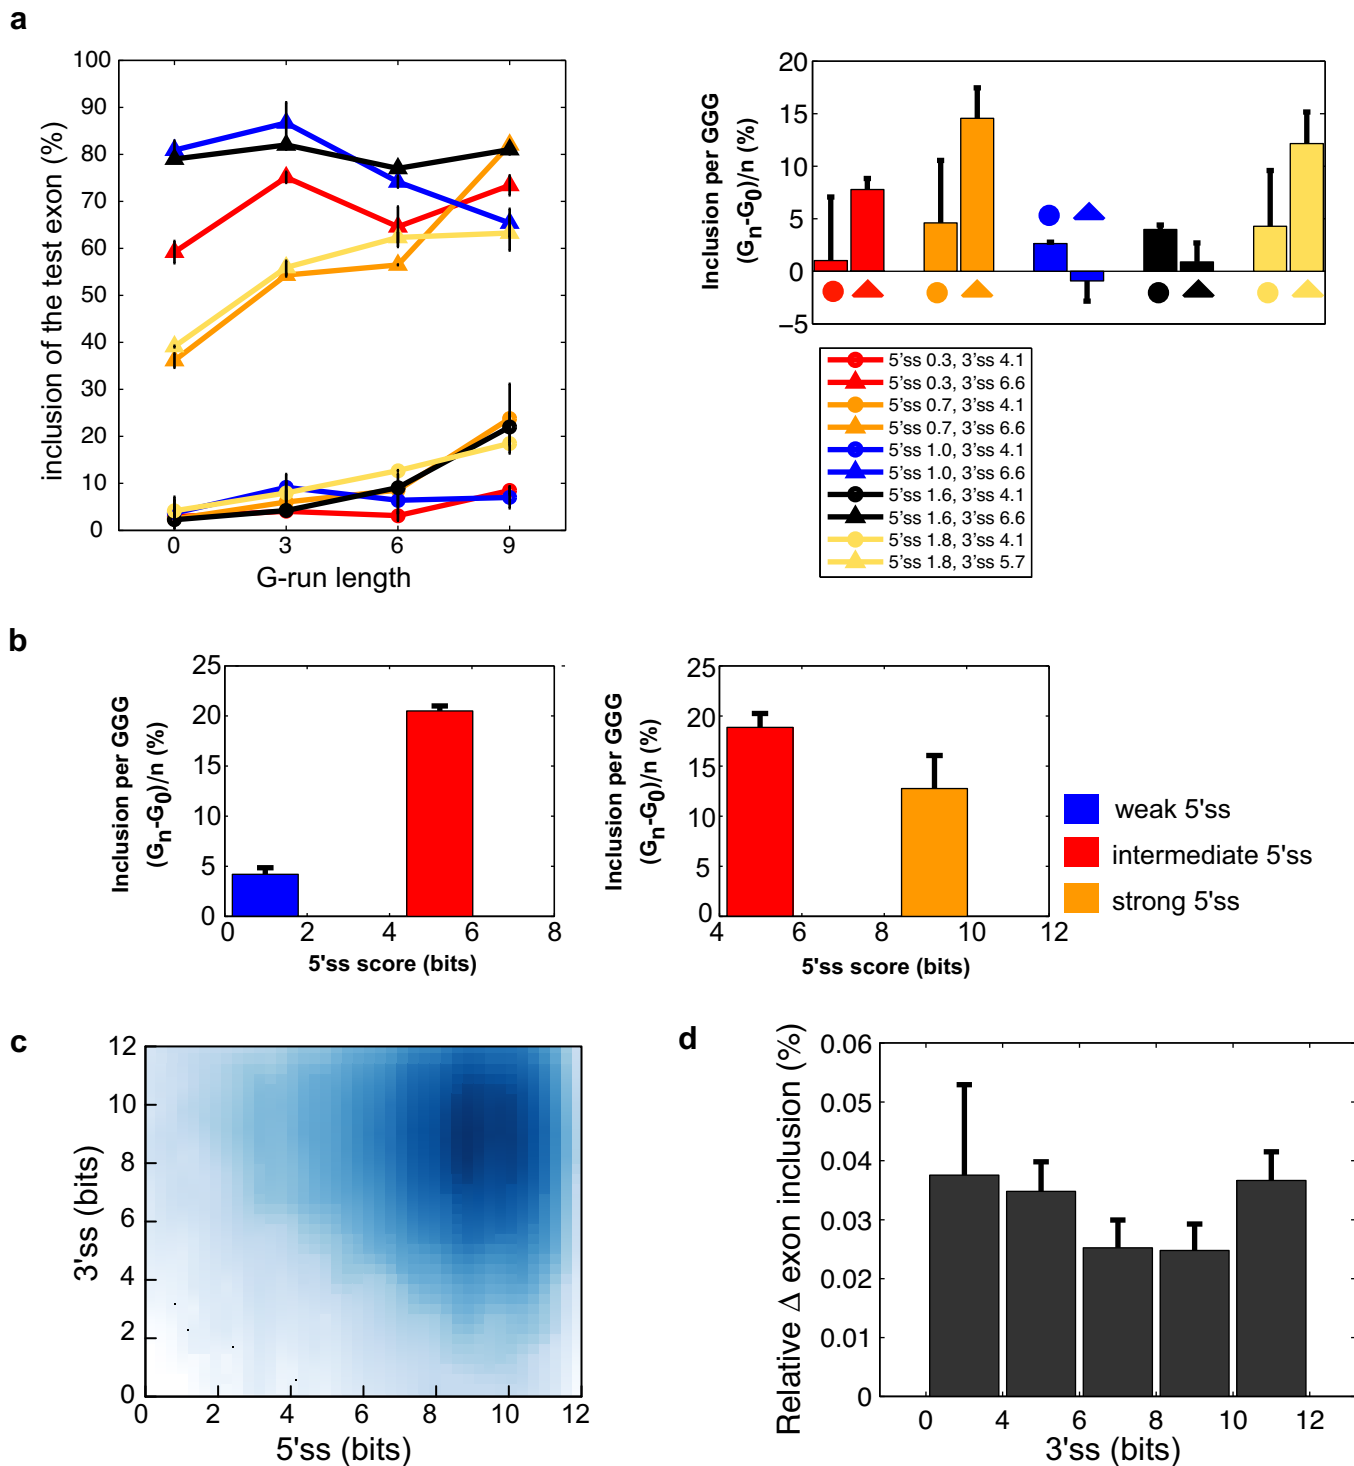

**Supplementary Figure 4. Absence of consistent pattern of dependence of GGG activity on 3'ss strength.**

(a) Left: Inclusion of the middle exon in reporters with different 5'ss and 3'ss. Pairs of reporters with same 5'ss but different 3'ss are shown in the same color. Right: change in inclusion of the middle exon normalized by the number of GGGs. All 5'ss strength are in the very weak range. (b) Activity of GGGs dependent on 5'ss strength with fixed 3'ss. Change in inclusion of the middle exon normalized by the number of GGGs in the intron in reporters with the same 3'ss (left: 4.1 bits, right: 2.1 bits) but different 5'ss strength. (c) Smoothed scatter plot of the 5'ss and 3'ss scores of human constitutive exons ( $R=-0.029$ ). (d) Change in exon inclusion level in the mRNA-SEQ data (% , control-HKD) in exons with at least 9 G's in G-runs in the downstream intron relative to exons with no G-runs, normalized by the number of G3. Exons with exonic or upstream intronic G-runs have been excluded. Exons are grouped according to the 3'ss scores. No significant difference was detected across different groups.

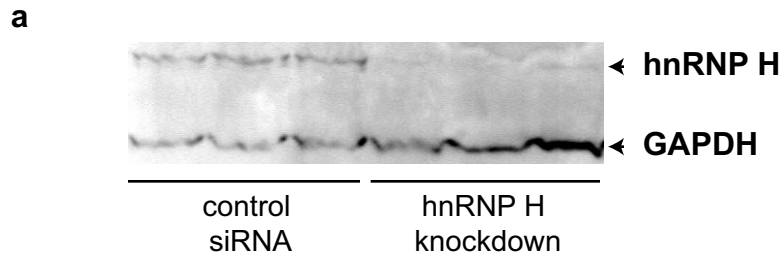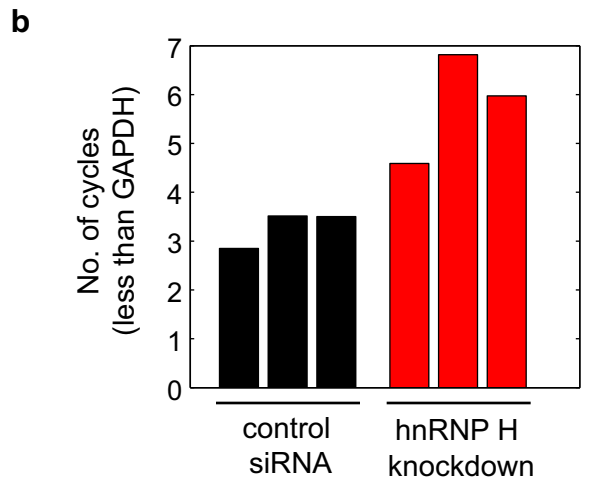

**Supplementary Figure 5. hnRNP H protein and mRNA levels following control siRNA and hnRNP H siRNA transfections. (a) Western blot using hnRNP H specific antibody and GAPDH antibody. (b) qPCR of hnRNP H level.**

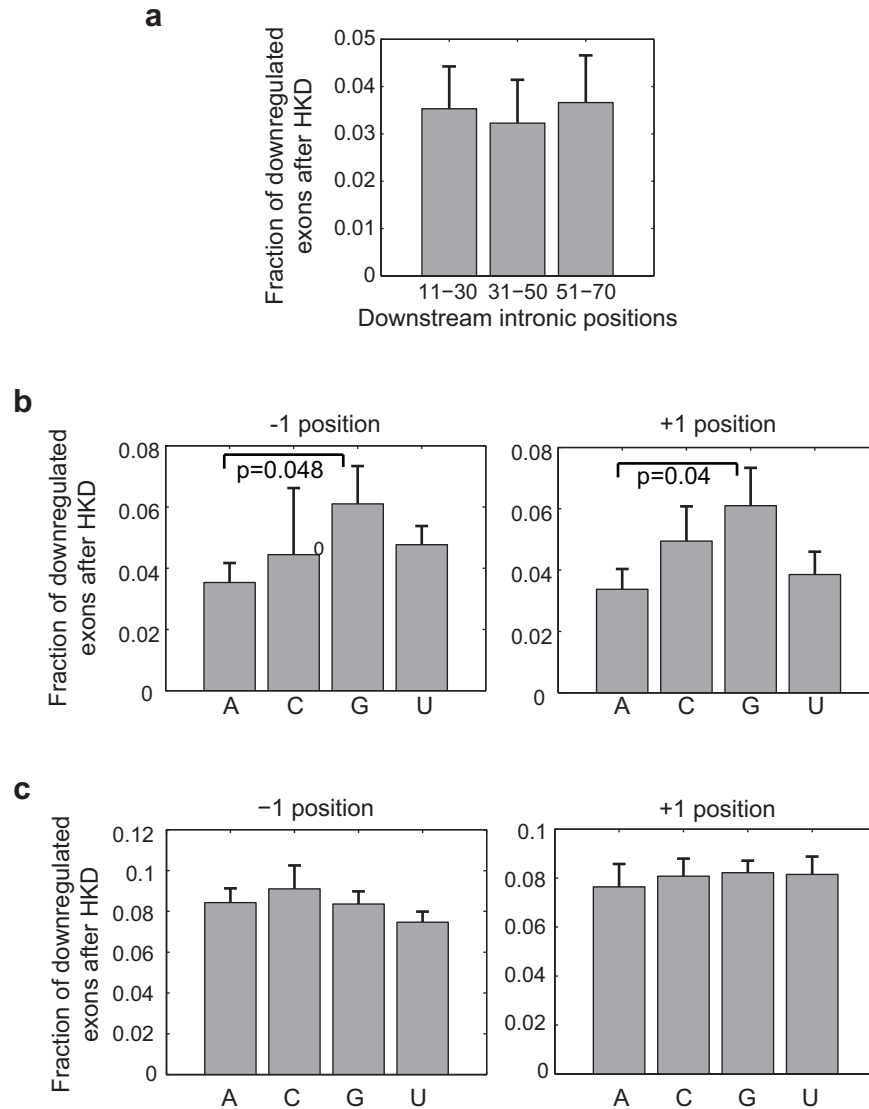

**Supplementary Figure 6. Function of G-rich motifs in different intronic positions or sequence contexts evaluated using the mRNA-SEQ data. (a)** Fraction of downregulated exons (mean and SEM) after HKD for exons with only one GGG motif in the downstream intron (11-70 nt). Exons were grouped according to the position of the intronic GGG. Data from mRNA-SEQ and exon arrays are combined together to have the largest data set. Downregulation is defined as a change of exon inclusion level of at least 20% in the mRNA-SEQ data and a change of relative exon expression (log<sub>2</sub> based) of at least 0.5 in the exon array data. **(b)** Fraction of downregulated exons (mean and SEM) after HKD for exons with only one GGG in the downstream intronic region (11-70 nt). Exons are grouped based on the sequence at the neighboring positions of the GGG. Unlabeled comparisons have p values greater than 0.05 (Fisher's Exact test). **(c)** Same as in **(b)** for exons with one GGGGU (and no other G-runs) in the downstream intronic region (11-70 nt).

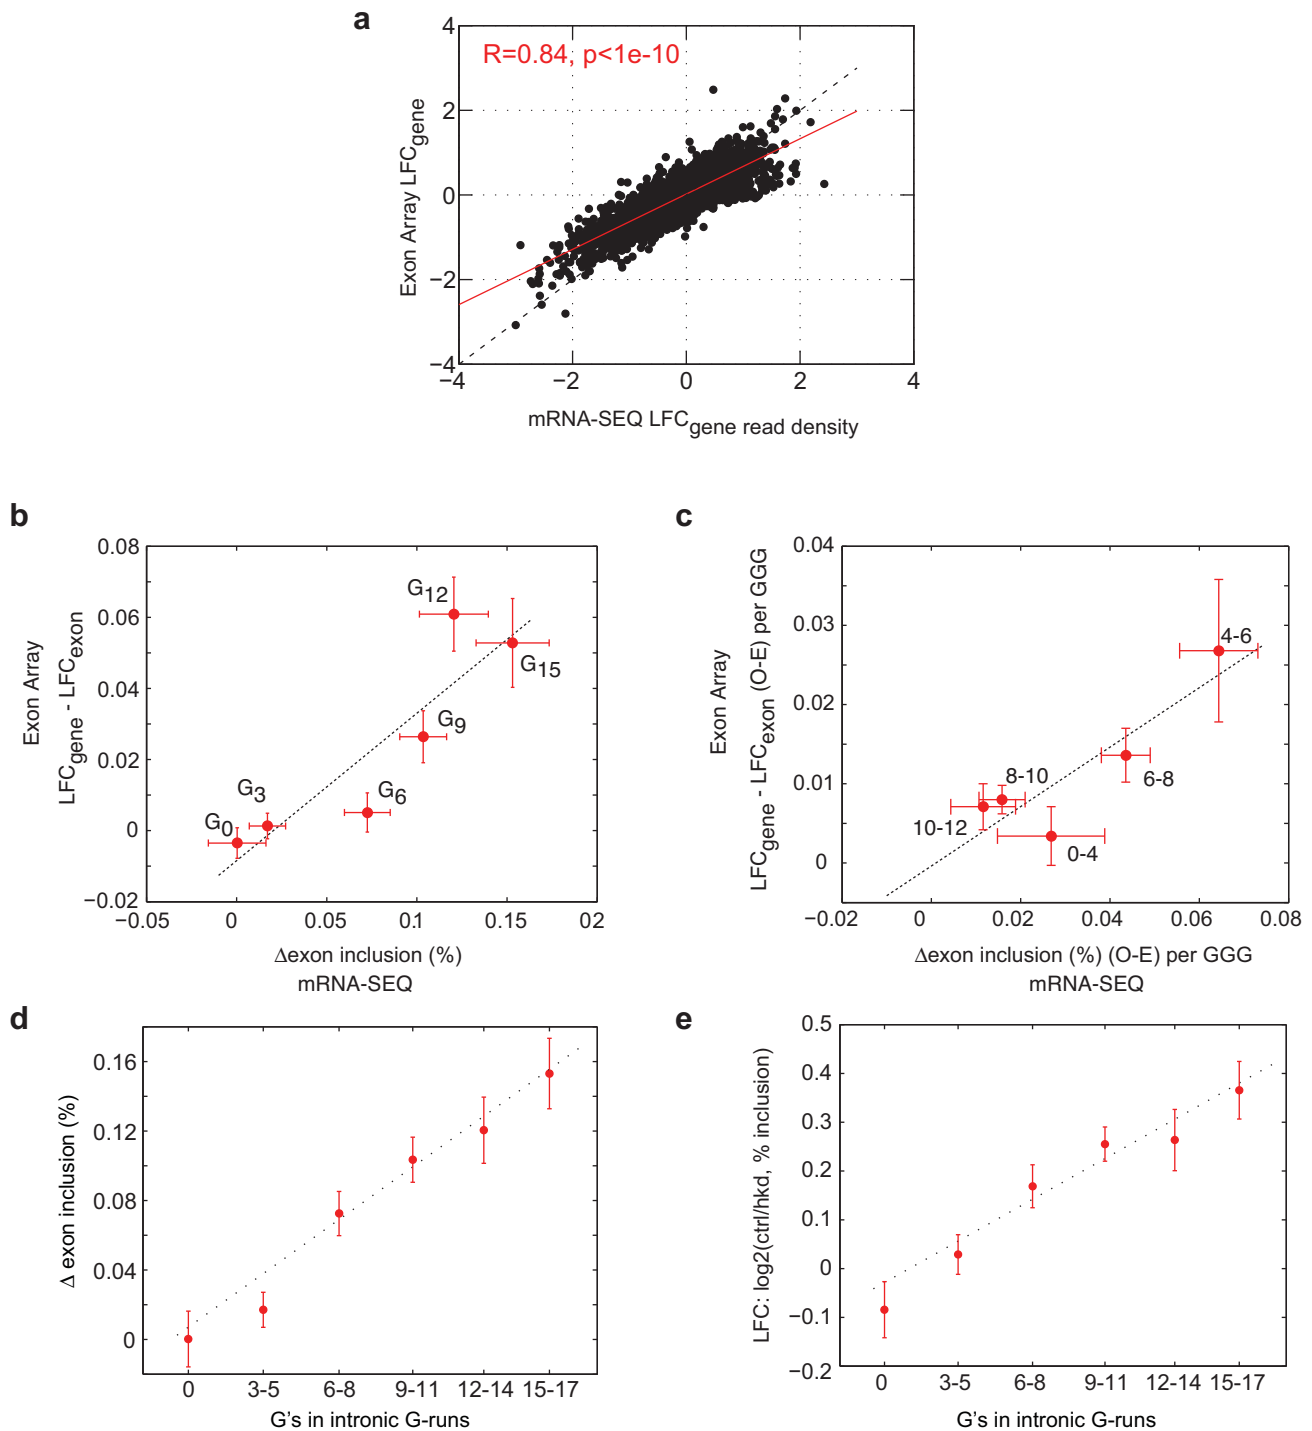

**Supplementary Figure 7. Affymetrix exon array and mRNA-SEQ data after hnRNP H knockdown (HKD).**

(a) Log-fold-change (LFC, defined as  $\text{Log}_2(\text{HKD}/\text{Ctrl})$ ) of gene levels calculated based on the array and mRNA-SEQ data. Pearson correlation coefficient and the corresponding p values are shown. (b) Relative LFC values (gene-exon) calculated from exon arrays and change in exon inclusion level (ctrl-HKD) in the mRNA-SEQ data for exons with different numbers of G's in G-runs in the downstream intron as labeled. Each point and error bars represent mean and SEM of all exons in the group respectively. (c) Normalized (per GGG) relative LFC values from exon arrays and normalized relative change in exon inclusion level in the mRNA-SEQ data for exons with different 5'ss strength. Ranges of 5'ss scores (bits) are labeled next to each point. (d) Change in the exon inclusion level (mean and SEM) in mRNA-SEQ defined as the difference between the values in the control and HKD experiments (mean values:  $R=0.99$ , all data:  $R=0.23$ ). (e) Change in the exon inclusion level in mRNA-SEQ defined as log-fold-change (LFC), which is calculated as  $\text{log}_2$  exon inclusion (control/HKD) (mean values:  $R=0.98$ , all data:  $R=0.18$ ).



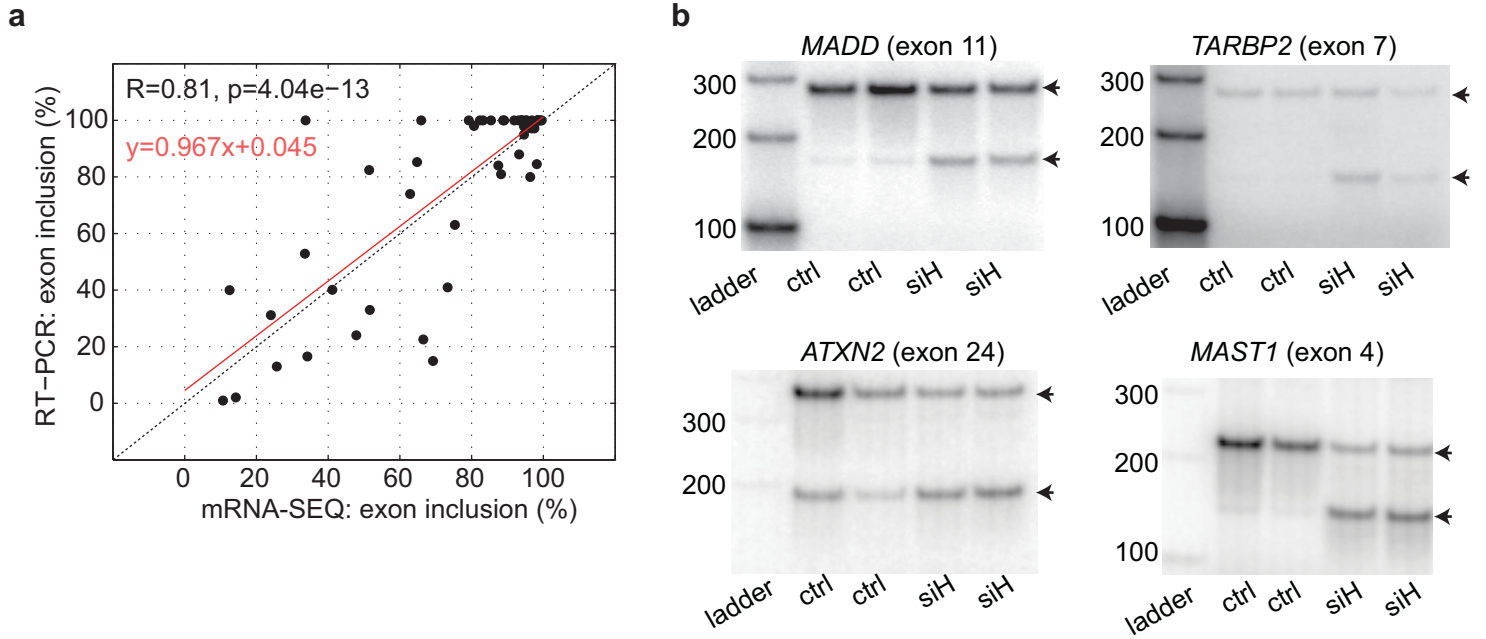

**Supplementary Figure 8. Comparison of exon inclusion levels estimated by RT-PCR, mRNA-SEQ and Exon Array. (a)** RT-PCR vs. mRNA-SEQ for twenty-six exons each with two values from the H-knockdown and control experiments respectively. **(b)** Representative gel images of RT-PCR.

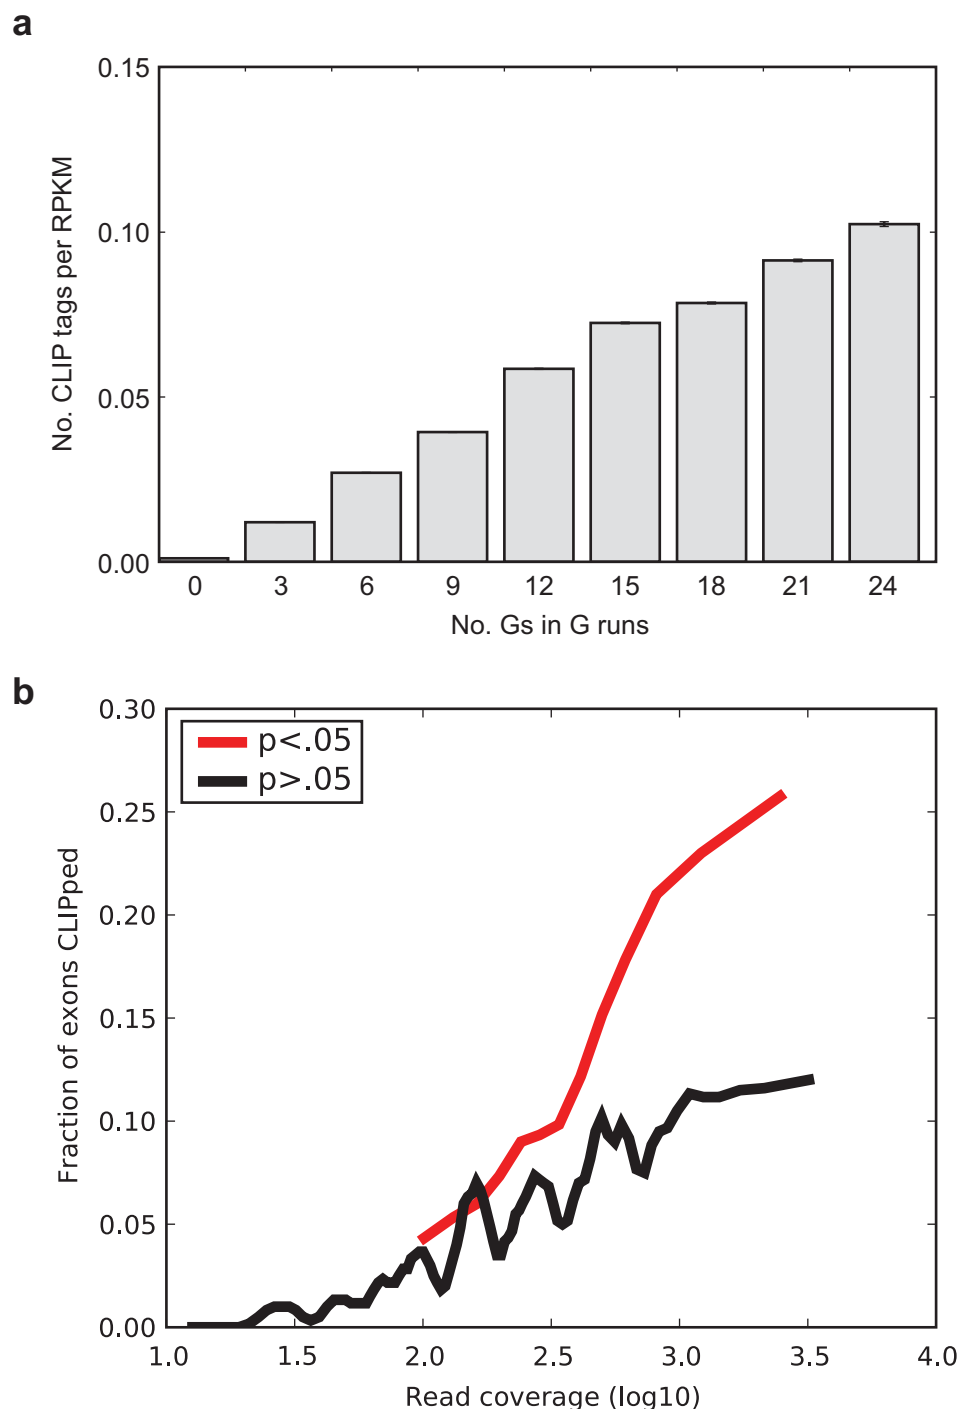

**Supplementary Figure 9. CLIP-SEQ data analysis.** (a) CLIP tag density as a function of number of G occurrences in G runs. CLIP tags in the region +10 to +250 downstream of all internal Ensembl exons were enumerated, along with the number of G occurrences found in runs of G3 or greater in each region. The density of CLIP tags, normalized by gene expression as inferred from RPKM values from mRNA-Seq data, is plotted as a function of the number of G occurrences. (b) Enrichment of CLIP tags in and around exons differentially regulated upon knockdown of hnRNP H. The number of CLIP tags in the region -250 to +250 (including the exon body) was counted for every internal Ensembl exon. Using mRNA-Seq data from control and hnRNP H knockdown cells, each exon was also evaluated for differential regulation by a Fisher's Exact test. The fraction of exons with CLIP tags is plotted as a function of read counts used in the Fisher's Exact test, for the group of exons differentially regulated ( $p < 0.05$ ) and all other exons ( $p > 0.05$ ).

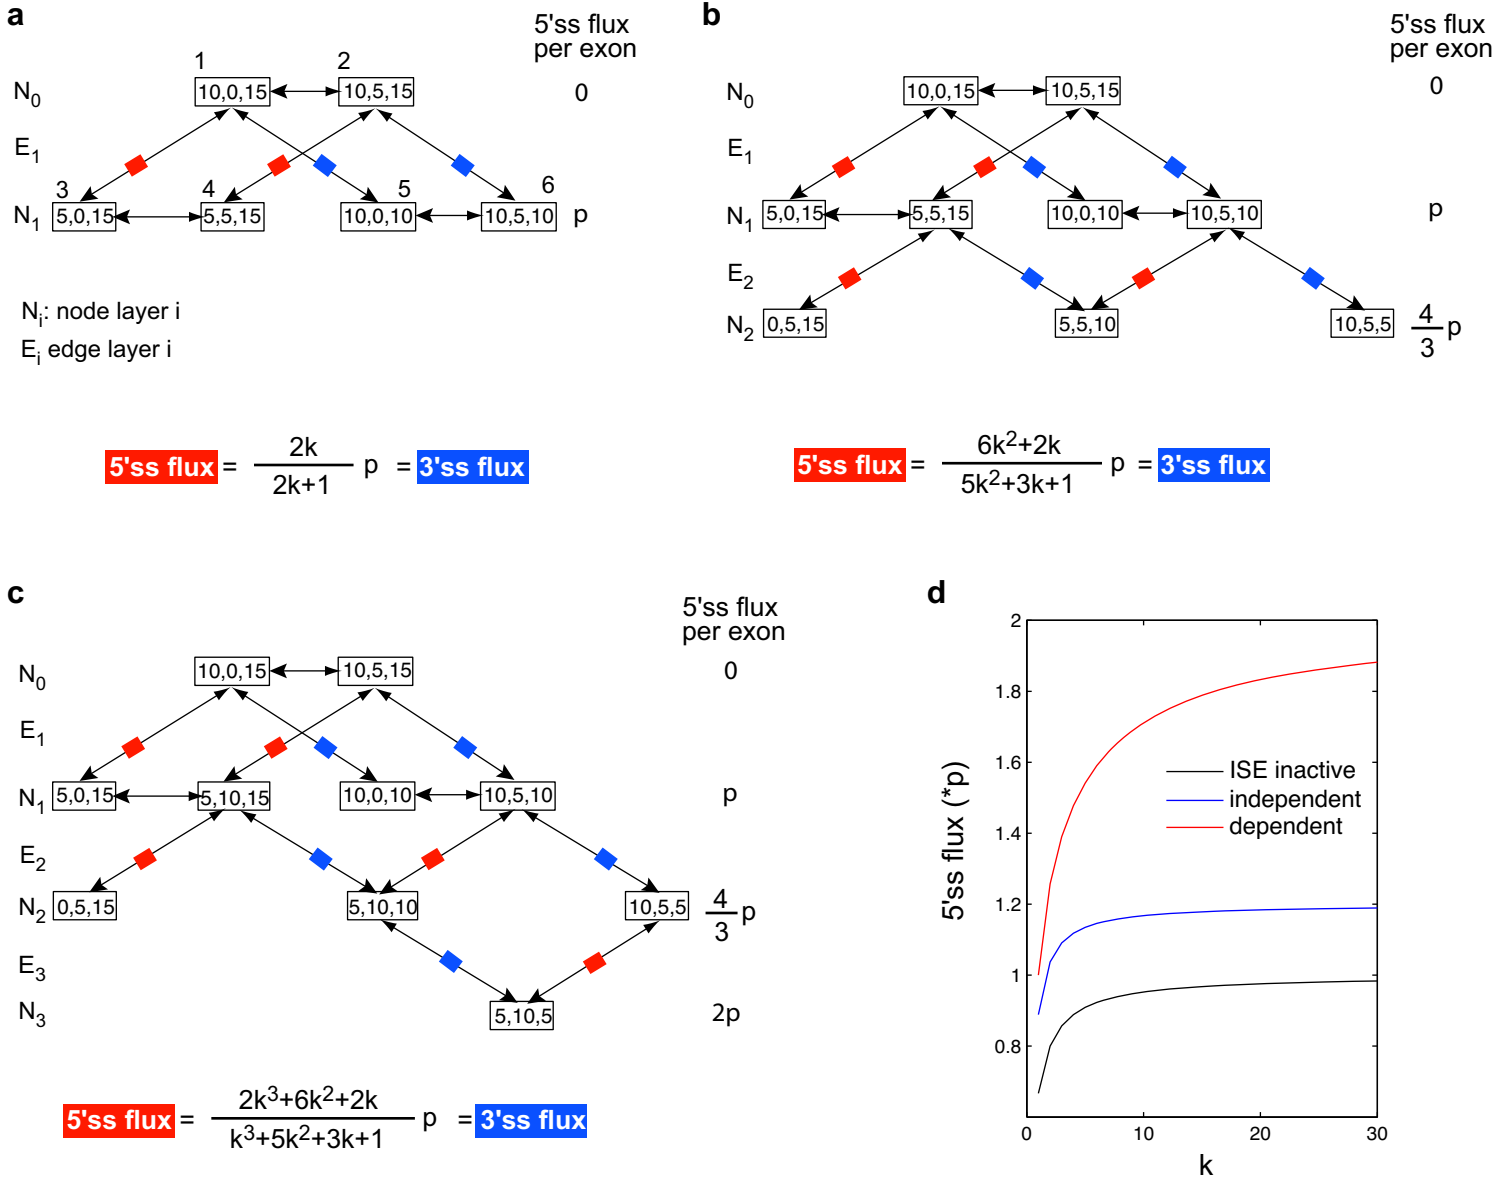

**Supplementary Figure 10. Evolutionary models of splicing cis-elements. (a)** ISE inactive. In the network, each box corresponds to a state of the exon with the 3 numbers in the box representing scores of 5'ss, ISE, 3'ss+others (e.g., ESE) respectively. Possible scores of 5'ss and 3'ss+others are assumed to be 0, 5 and 10. Possible scores of ISE are assumed to be 0 and 5. However, since the ISEs are inactive in this model, ISE scores are not counted in the total score of the exon. The summation of scores of all elements is required to be at least 20 for the exon to be spliced. The mutation rates are assumed to be  $p$  for mutations in the directions of small arrowheads, and  $k \cdot p$  ( $k > 1$ ) in the directions of big arrowheads. Red bars overlap with network edges corresponding to changes in 5'ss (i.e., 5'ss flux); blue bars overlap with 3'ss flux. Numbers on the right of the network represent 5'ss flux involving the nodes in the corresponding layers normalized by the number of exons in the layer. The total flux for the 5'ss (same as 3'ss flux) is shown below the network. **(b)** ISE activity independent of 5'ss. Same as in (A) except that the ISEs are active and the ISE scores are counted in the total score of the exon. **(c)** ISE activity dependent on 5'ss strength. Same as in (a) except that the scores of ISEs are dependent on the score of 5'ss. Specifically, the ISEs are scored 5 in case of a 5'ss score of 0 or 10, but 10 in case of a 5'ss score of 5. **(d)** 5'ss flux of the three models relative to different values of  $k$ .

### MYEF2 (Myelin expression factor 2), RRM domain

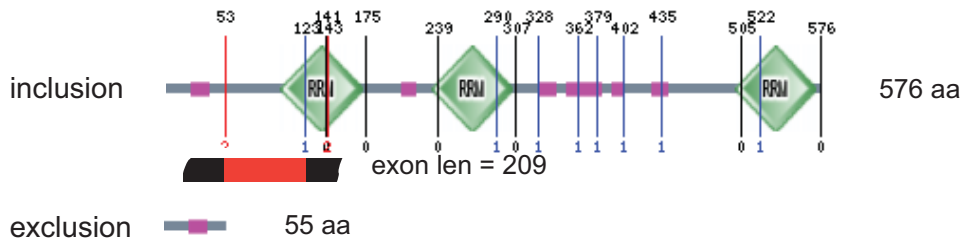

### BMPER (BMP-binding endothelial regulator protein precursor), VWD domain

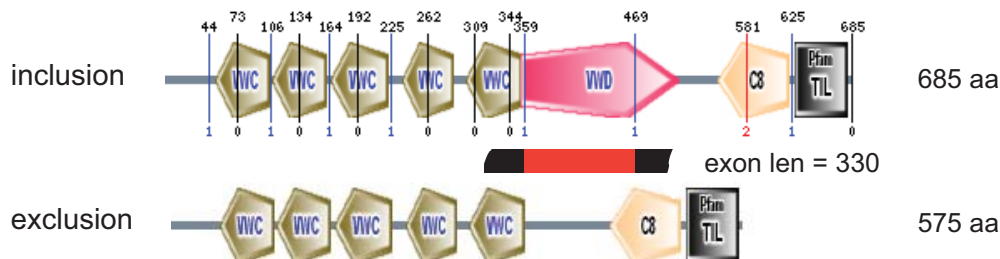

### MAST1 (Microtubule-associated serine/threonine-protein kinase 1), S\_TK\_x domain

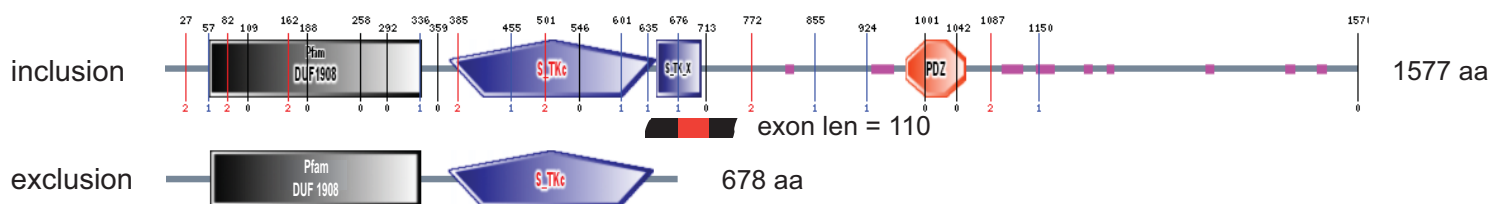

### CASR: Extracellular calcium-sensing receptor precursor, Pfam ANF\_receptor domain

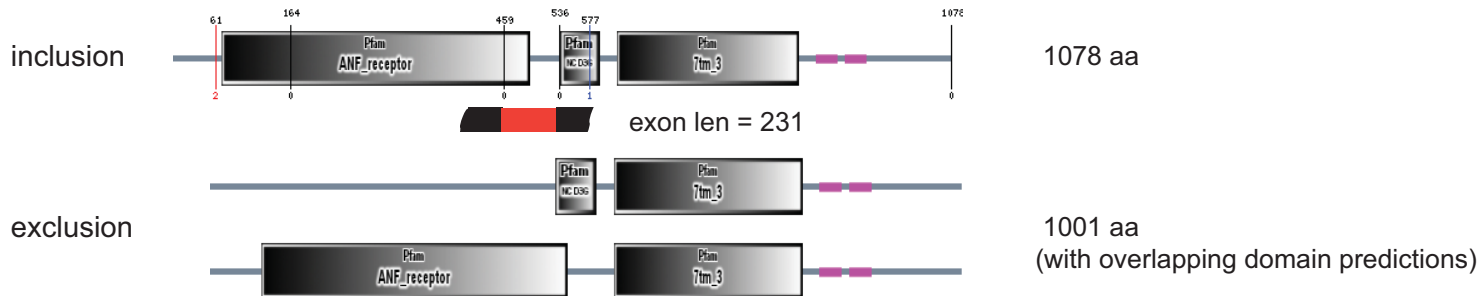

### MTMR4 (myotubularin related protein 4), PTPc domain

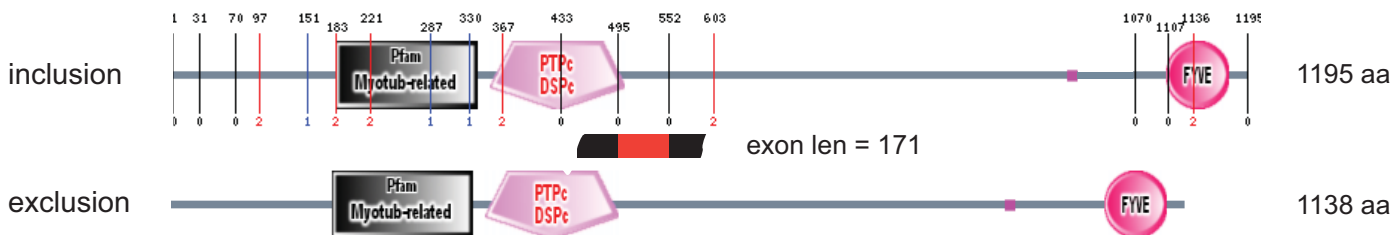

■ segments of low compositional complexity

**Supplementary Figure 11. Examples of protein domains overlapping human constitutive exons (red boxes) that are alternatively spliced in mouse and with G-runs ( $\geq 6$  G's) in the downstream intron. Protein domain annotations were obtained from SMART and Pfam. Hypothetical exon exclusion transcripts were generated by removing the red exon from the exon inclusion isoform.**

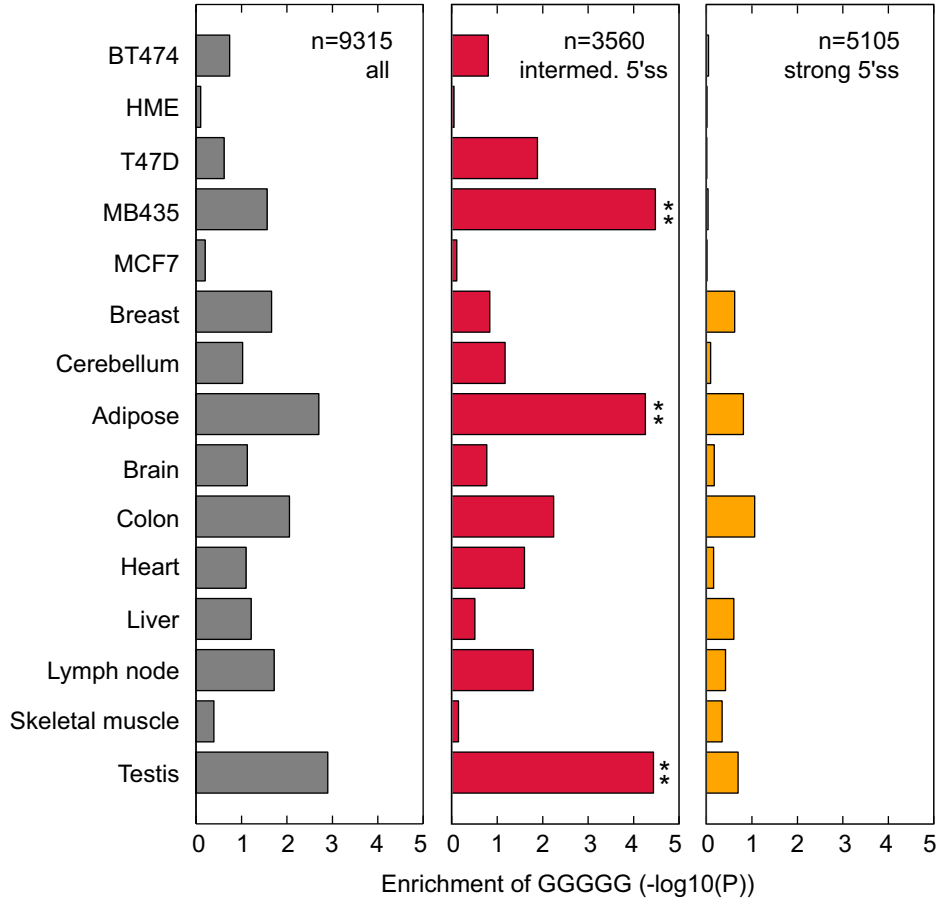

**Supplementary Figure 12. Enrichment of GGGGG in the downstream introns (11-70 nt from 5'ss) of skipped exons with tissue-biased inclusion (Wang et al 2008).** P values were calculated for the enrichment of GGGGG counts relative to cohorts of control pentamers in the same region. Left panel: all exons with tissue-biased inclusion; middle: exons with intermediate 5'ss (4-8 bits); right: exons with strong 5'ss (8-12 bits). P value bars are labeled \* if  $p < 0.01$  and \*\* if  $p < 0.001$  after Bonferroni correction.

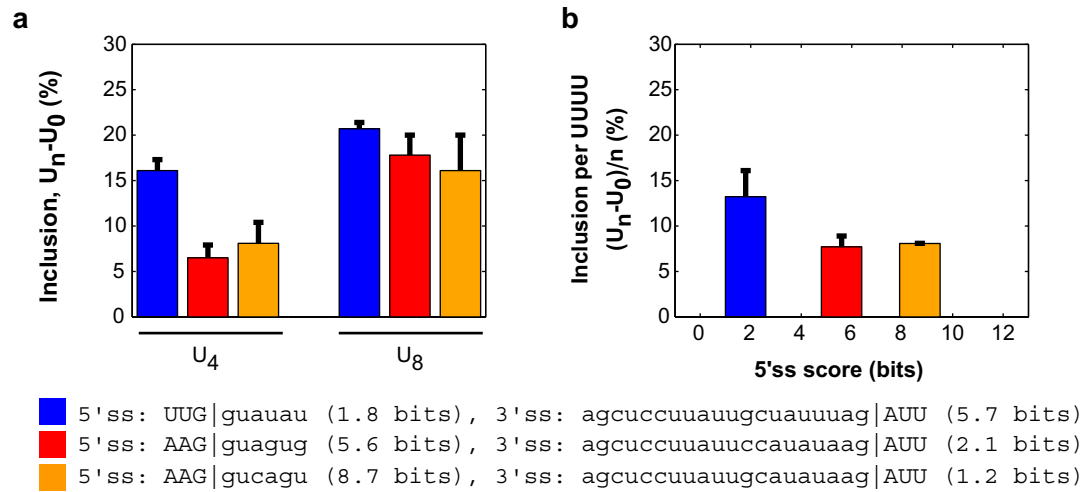

**Supplementary Figure 13. U-runs as ISEs in the downstream intron have high activity for weak 5'ss. (a).** Inclusion (%) of the test exon with U<sub>4</sub> or U<sub>8</sub> in the downstream intron, relative to control insert (U<sub>0</sub>). **(b).** Change in inclusion (%) of the test exon normalized by the number of UUUU inserted in the downstream intron.

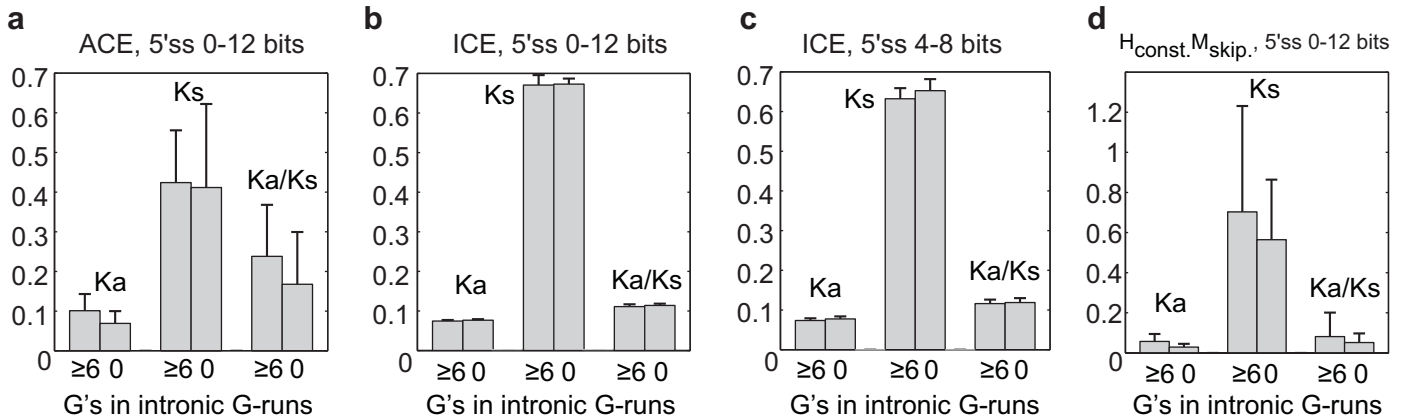

**Supplementary Figure 14. Ka, Ks and Ka/Ks values of in different types of exons with or without G-runs in the downstream introns (11-70 bp).** Methods of calculation of Ka, Ks and Ka/Ks are the same as in Xing et al, PNAS, 2005. (a) Conserved skipped exons (i.e., ACEs) with 5'ss in the range of 0-12 bits; (b) Conserved constitutive exons (i.e., ICEs) with 5'ss in the range of 0-12 bits; (c) ICEs with 5'ss in the range of 4-8 bits; (d) Exons that are constitutively spliced in human but alternatively skipped in mouse ( $H_{\text{const.}}M_{\text{skip.}}$ ) with 5'ss in the range of 0-12 bits.

**Supplementary Table 1.** Splice sites of splicing reporters and test exon inclusion data

| Name       | 5'ss sequence | 5'ss score (bits) | 3'ss score (bits) <sup>a</sup> | % inclusion of test exon <sup>b</sup> |                |                |                |
|------------|---------------|-------------------|--------------------------------|---------------------------------------|----------------|----------------|----------------|
|            |               |                   |                                | Length of inserted G-run              |                |                |                |
|            |               |                   |                                | G <sub>0</sub>                        | G <sub>3</sub> | G <sub>6</sub> | G <sub>9</sub> |
| pGM6 (w1)  | AUG   GUAGUG  | 0.3               | 4.1                            | 2.9±2.0                               | 4.0±1.1        | 3.2±1.1        | 8.5±0.8        |
| pGM5 (w2)  | AAA   GUAAUC  | 0.6               | 4.1                            | 2.7±0.5                               | 5.1±1.7        | 13.5±3.9       | 14.0±2.8       |
| pGM7 (w3)  | UUG   GUAUCU  | 0.7               | 4.1                            | 2.4±2.1                               | 6.0±2.5        | 8.6±3.5        | 23.8±7.4       |
| pGM1 (w4)  | AAG   GUGGCA  | 1.0               | 4.1                            | 3.7±2.8                               | 9.2±2.8        | 6.4±2.9        | 7.0±2.3        |
| pMZ1 (w5)  | AAG   GUUUUG  | 1.6               | 4.1                            | 2.3±1.1                               | 4.2±0.7        | 9.1±0.6        | 22.0±3.0       |
| pGM2 (w6)  | UUG   GUAUUAU | 1.8               | 4.1                            | 4.2±3.0                               | 8.0±2.5        | 12.7±0.1       | 18.5±0.4       |
| pGM3 (w7)  | UUG   GUUUGU  | 1.9               | 4.1                            | 5.5±2.2                               | 13.1±2.1       | 16.8±2.6       | 46.2±2.0       |
| pGM17      | UUG   GUAUCU  | 0.7               | 5.7                            | 36.1±1.5                              | 54.3±0.3       | 56.5±0.1       | 82.0±0.6       |
| pGM16      | UUG   GUAUUAU | 1.8               | 5.7                            | 39.1±0.2                              | 55.9±1.4       | 62.3±1.2       | 63.3±3.7       |
| pGM11      | AUG   GUAGUG  | 0.3               | 6.6                            | 59.2±2.4                              | 75.1±1.2       | 64.6±4.3       | 73.4±2.1       |
| pGM13      | UUG   GUAUCU  | 0.7               | 6.6                            | 83.7±1.5                              | 92.4±0.3       | 89.3±0.1       | 96.8±0.6       |
| pGM10      | AAG   GUGGCA  | 1.0               | 6.6                            | 80.9±2.0                              | 86.7±4.4       | 74.2±1.2       | 65.4±3.0       |
| pMZ3       | AAG   GUUUUG  | 1.6               | 6.6                            | 79.0±0.3                              | 82.0±1.0       | 77.0±1.0       | 81.0±1.0       |
| pMZ5 (i1)  | AAG   GUGAUG  | 5.2               | 2.1                            | 9.8±2.7                               | 20.8±1.6       | 47.9±1.2       | 76.0±0.1       |
| pMZ7 (i2)  | AAG   GUAGUG  | 5.6               | 2.1                            | 12.5±2.0                              | 27.0±2.0       | 46.0±3.0       | 80.0±0.1       |
| pMZ8 (i3)  | AAG   GUUAGA  | 6.1               | 2.1                            | 20.8±1.5                              | 41.0±3.0       | 60.0±1.0       | 93.0±1.0       |
| pMZ2       | AAG   GUGAUG  | 5.2               | 4.1                            | 54.4±2.7                              | 73.8±1.5       | 95.7±4.2       | 94.9±0.5       |
| pGM14 (s1) | AAG   GUCAGU  | 8.7               | 1.2                            | 30.7±3.2                              | 42.9±0.7       | 63.5±0.3       | 78.3±0.2       |
| pGM9       | AAG   GUCAGU  | 8.7               | 2.1                            | 81.4±0.6                              | 86.1±1.0       | 88.6±0.7       | 89.7±0.1       |
| pMZ6 (s2)  | AAG   GUGAGG  | 9.2               | 2.1                            | 56.0±2.5                              | 76.5±1.8       | 85.0±0.7       | 90.0±0.8       |

<sup>a</sup>3'ss sequences (scores):  
 agcuccuauugcauauuag/AUU (4.1 bits)  
 agcuccuauugcauuuag/AUU (5.7 bits)  
 agcuccuuuuugcuauuag/AUU (6.6 bits)  
 agcuccuauuccauauaag/AUU (2.1 bits)  
 agcuccuauugcauauaag/AUU (1.2 bits)

<sup>b</sup>Percent inclusion values represent mean and range of replicates. Values are shown in gray if the average inclusion values of corresponding constructs with fewer G-triplets were >85%. These values were not included in Fig. 1b.



**Supplementary Table 2.** qRT-PCR validation of reduced exon inclusion following hnRNP H knockdown and primers used.

| Category              | Ensembl exon ID <sup>a</sup> | Ensembl gene ID <sup>b</sup> | Gene name | Validation                                      | Primers <sup>c</sup>                                | Ensembl exon ID | Ensembl gene ID | Gene name | Validation                                        | Primers                                           |
|-----------------------|------------------------------|------------------------------|-----------|-------------------------------------------------|-----------------------------------------------------|-----------------|-----------------|-----------|---------------------------------------------------|---------------------------------------------------|
| candidate H-activated | 1148544                      | 139546                       | TARBP2    | Yes                                             | F CACAGTGACCCAGGAGTCTG<br>R TCGTAGAGAATCCAGGTGC     | 1473133         | 074219          | TEAD2     | Yes                                               | F CAAGGGAAATCCAGTCCAAG<br>R ATCCTCCAGACCAAACTGG   |
|                       | 1316542                      | 185359                       | HGS       | Yes                                             | F ACGAGCCCAAGTACAAGGTG<br>R GTCATCACCCCGAACTGC      | 1472346         | 204681          | GABBR1    | Yes                                               | F ATGTCCTCACTCTCGCCATC<br>R GCAGCCCCTTGTAACCATAG  |
|                       | 1163808                      | 144043                       | TEX261    | Yes                                             | F AATACACAGTGGCCACCAGC<br>R GCTAGGTAATGATTCACCACCAC | 1001187         | 151693          | ASAP2     | No                                                | F CTGCACTACTGCTGCCTGAC<br>R CGCCATTCATATTC AACGTG |
|                       | 1186760                      | 173020                       | ADRBK1    | No                                              | F GAAGTGCCTGGACAAAAAGC<br>R AGAGGTGGTAGTGCAGGTCC    | 1033259         | 157538          | DSCR3     | Yes                                               | F CGTATCATGGCGTGTGTTGTC<br>R GTAATCGTGAAGTCCACGGG |
|                       | 1074445                      | 157404                       | KIT       | No                                              | F GGAAGCCCTCATGTCTGAAC<br>R ACAGATCTCCTTTTGTGCGGC   | 1455572         | 119912          | IDE       | No                                                | F CCTTCCAAGTCAGCTGGTTC<br>R TGTATGCCATTAGCTCGACG  |
|                       | 1462548                      | 157657                       | ZNF618    | Yes                                             | F ACATCCAGGAGGTGATCTGG<br>R GATTCCGCATTCGTAAGACC    | 0897426         | 068903          | SIRT2     | Yes                                               | F AGTTCTGTGCCCTATCACGG<br>R TGTCTGCTTCTCCACCAGC   |
|                       | 0921221                      | 110514                       | MADD      | Yes                                             | F TGATTGGTGACAAGCCAAAAG<br>R AGTGCTGCATGTGTCAGAGG   | 0880797         | 100416          | TRMU      | Yes                                               | F TACAGGGACCTGCTGAGGAC<br>R GTCAGAGCAAGGGACTCAGG  |
|                       | 1370700                      | 185513                       | L3MBTL    | Yes                                             | F TCCAGAAGATCCCAATCAGG<br>R CTAGCAGTGGGTTGTCCCTC    | 1309322         | 142192          | APP       | No                                                | F aggaaCCCTACGAAGAAGCC<br>R TTCTCATCCCCAGGTGTCTC  |
|                       | 1033563                      | 066777                       | ARFGEF1   | No                                              | F TTTGCTAGTGCGGATACAGC<br>R GGCCTCCATGAGTGCTTTAG    | 1474519         | 204842          | ATXN2     | Yes                                               | F TCGCCACAGAATAGTTTCCC<br>R AGCAGTAGAAGGGAGGAGGG  |
|                       | 1036207                      | 182095                       | TNRC18    | Yes                                             | F GTATGCCATGAAGTCCTCCC<br>R TCATGTTCCCTCCTCAGACCC   | 0682741         | 105613          | MAST1     | Yes                                               | F CACTTCTCGTTTGCCTCCTC<br>R CACCATCCTCGTCTGTGATG  |
| 1180438               | 114859                       | CLCN2                        | No        | F CCTCTTCAAAACCGATTCC<br>R ATGAACTGTCCAAAGCCAGG | 0893273                                             | 083750          | RRAGB           | Yes       | F TGATGGGTAAAAGTGGGTCTG<br>R CCCACAGGTTCAATACCAGG |                                                   |
| Negative controls     | 1067767                      | 066279                       | ASPM      | Yes                                             | F GCTAGGCGGTTAATTGTTTCG<br>R TCAGGATTCCAAAGTAGGCG   |                 |                 |           |                                                   |                                                   |
|                       | 0915987                      | 134762                       | DSC3      | Yes                                             | F CATCCAACCTCAGTGTCGTGC<br>R TGTGCCACTCCGAGTAAGTG   |                 |                 |           |                                                   |                                                   |
|                       | 0678439                      | 005100                       | DHX33     | Yes                                             | F AAGTCCCAAATGTGCTCACC<br>R TATGAACTTCTTGC GGACCC   |                 |                 |           |                                                   |                                                   |
|                       | 1083756                      | 164347                       | GFM2      | Yes                                             | F ATGCAGGCAAACTACCACC<br>R CACTGCACCATCCAACACTC     |                 |                 |           |                                                   |                                                   |

<sup>a</sup>Ensembl (version 45) exon IDs are "ENSE0000" followed by the numbers shown.

<sup>b</sup>Ensembl (version 45) gene IDs are "ENSG00000" followed by the numbers shown.

<sup>c</sup>F: forward primers; R: reverse primers

**Supplementary Table 3.** Base composition of uniquely mapped CLIP tags (3.6 million). The number of mono-, di-, and tri-nucleotides were enumerated and shown in the table, along with their percent occurrence among all mono-, di-, and tri-nucleotides observed.

|                     | <b>Sequence</b> | <b>#Occurrences</b> | <b>Percentage</b> |
|---------------------|-----------------|---------------------|-------------------|
| <b>Top 4 1mers:</b> | G               | 54032175            | 46.3%             |
|                     | A               | 33130053            | 28.4%             |
|                     | T               | 15839678            | 13.6%             |
|                     | C               | 13704408            | 11.7%             |
| <b>Top 4 2mers:</b> | GG              | 23667823            | 20.9%             |
|                     | AG              | 17679666            | 15.6%             |
|                     | GA              | 17165640            | 15.2%             |
|                     | AA              | 9872595             | 8.7%              |
| <b>Top 4 3mers:</b> | GGG             | 9776419             | 8.9%              |
|                     | GAG             | 9257906             | 8.5%              |
|                     | GGA             | 7965353             | 7.3%              |
|                     | AGG             | 7682803             | 7.0%              |

**Supplementary Table 4.** Differentially expressed exons<sup>a</sup> upon hnRNP H knockdown and the number of CLIP tags mapped to the exon, upstream (-280 to -40 nt) and downstream (+10 to +250 nt) intronic regions.

| Gene            | Symbol   | Exon coordiante             | Num of mRNA-Seq Reads |      |        |                  |                   |      |        |       | P value <sup>c</sup> | Num of CLIP tags  |            |                   |                      |               |                      |
|-----------------|----------|-----------------------------|-----------------------|------|--------|------------------|-------------------|------|--------|-------|----------------------|-------------------|------------|-------------------|----------------------|---------------|----------------------|
|                 |          |                             | Control knockdown     |      |        |                  | hnRNP H knockdown |      |        |       |                      | -280 to -40 (All) | Exon (All) | +10 to +250 (All) | -280 to -40 (Unique) | Exon (Unique) | +10 to +250 (Unique) |
|                 |          |                             | Inc                   | Excl | common | PSI <sup>b</sup> | Inc               | Excl | common | PSI   |                      |                   |            |                   |                      |               |                      |
| ENSG00000141756 | FKBP10   | chr17:37229619:37229801:+   | 103                   | 56   | 1724   | 0.281            | 472               | 10   | 2198   | 0.909 | 5.70E-37             | 0                 | 20         | 0                 | 0                    | 4             | 0                    |
| ENSG00000092841 | MYL6     | chr12:54840677:54840721:+   | 26                    | 130  | 1567   | 0.082            | 247               | 39   | 2114   | 0.738 | 6.30E-34             | 0                 | 0          | 0                 | 0                    | 0             | 0                    |
| ENSG00000169592 | INO80E   | chr16:29920034:29923479:+   | 937                   | 2    | 2800   | 0.881            | 359               | 12   | 2212   | 0.322 | 4.30E-28             | 0                 | 1269       | 136               | 0                    | 4             | 4                    |
| ENSG00000146416 | AIG1     | chr6:143499665:143499820:+  | 140                   | 2    | 548    | 0.943            | 75                | 0    | 1138   | 1     | 1.10E-19             | 0                 | 0          | 0                 | 0                    | 0             | 0                    |
| ENSG00000129351 | ILF3     | chr19:10659022:10659384:+   | 534                   | 5    | 2915   | 0.931            | 732               | 0    | 2275   | 1     | 3.50E-19             | 15                | 6          | 10                | 3                    | 3             | 3                    |
| ENSG00000114631 | PODXL2   | chr3:128869974:128870130:+  | 115                   | 0    | 215    | 1                | 55                | 3    | 436    | 0.812 | 3.30E-16             | 0                 | 0          | 5                 | 0                    | 0             | 2                    |
| ENSG00000204463 | BAT3     | chr6:31715256:31715402:-    | 197                   | 13   | 193    | 0.788            | 97                | 22   | 291    | 0.52  | 6.50E-14             | 0                 | 0          | 0                 | 0                    | 0             | 0                    |
| ENSG00000144043 | TEX261   | chr2:71072468:71072621:-    | 106                   | 3    | 17     | 0.894            | 16                | 18   | 24     | 0.175 | 1.80E-13             | 0                 | 0          | 0                 | 0                    | 0             | 0                    |
| ENSG00000104852 | SNRP70   | chr19:54297183:54298656:+   | 1177                  | 65   | 3473   | 0.395            | 624               | 133  | 2668   | 0.145 | 3.20E-13             | 13                | 689        | 47                | 3                    | 4             | 4                    |
| ENSG00000198931 | APRT     | chr16:87404332:87404465:-   | 585                   | 12   | 329    | 0.927            | 269               | 62   | 270    | 0.531 | 1.90E-12             | 0                 | 0          | 0                 | 0                    | 0             | 0                    |
| ENSG00000169592 | n/a      | chr16:29920236:29920352:+   | 99                    | 2    | 2800   | 0.933            | 16                | 12   | 2212   | 0.274 | 6.50E-12             | 0                 | 1          | 9                 | 0                    | 1             | 3                    |
| ENSG00000080603 | SRCAP    | chr16:30640011:30640298:+   | 100                   | 0    | 328    | 1                | 29                | 13   | 380    | 0.253 | 8.90E-12             | 0                 | 0          | 0                 | 0                    | 0             | 0                    |
| ENSG00000123159 | GIPC1    | chr19:14464669:14464724:-   | 39                    | 8    | 48     | 0.666            | 6                 | 11   | 109    | 0.182 | 2.60E-11             | 0                 | 0          | 0                 | 0                    | 0             | 0                    |
| ENSG00000126005 | EIF6     | chr20:33331871:33332046:-   | 429                   | 1    | 278    | 0.989            | 191               | 8    | 268    | 0.839 | 4.40E-11             | 0                 | 0          | 0                 | 0                    | 0             | 0                    |
| ENSG00000173812 | EIF1     | chr17:37099556:37099719:+   | 206                   | 2    | 1743   | 0.959            | 494               | 17   | 2351   | 0.869 | 5.40E-11             | 18                | 0          | 0                 | 3                    | 0             | 0                    |
| ENSG00000182979 | MTA1     | chr14:104986741:104986791:+ | 32                    | 8    | 801    | 0.629            | 1                 | 13   | 1048   | 0.032 | 6.10E-11             | 3                 | 1          | 5                 | 2                    | 1             | 3                    |
| ENSG00000135506 | n/a      | chr12:56400149:56400313:+   | 93                    | 23   | 549    | 0.479            | 362               | 0    | 1005   | 1     | 8.10E-11             | 0                 | 1          | 0                 | 0                    | 1             | 0                    |
| ENSG00000170889 | RPS9     | chr19:59401956:59402142:+   | 140                   | 3    | 816    | 0.907            | 465               | 47   | 1375   | 0.674 | 2.60E-10             | 0                 | 1          | 0                 | 0                    | 1             | 0                    |
| ENSG00000188157 | AGRN     | chr1:978996:979220:+        | 200                   | 0    | 530    | 1                | 74                | 1    | 487    | 0.931 | 3.20E-10             | 0                 | 0          | 0                 | 0                    | 0             | 0                    |
| ENSG00000071462 | WBSCR22  | chr7:72745595:72745680:+    | 169                   | 0    | 228    | 1                | 47                | 1    | 197    | 0.94  | 7.50E-10             | 1                 | 0          | 0                 | 1                    | 0             | 0                    |
| ENSG00000142453 | CARM1    | chr19:10893051:10893119:+   | 34                    | 15   | 2643   | 0.458            | 119               | 2    | 3036   | 0.957 | 9.50E-10             | 0                 | 0          | 0                 | 0                    | 0             | 0                    |
| ENSG00000175634 | RPS6KB2  | chr11:66955415:66955562:+   | 167                   | 0    | 273    | 1                | 73                | 2    | 314    | 0.899 | 1.10E-09             | 0                 | 0          | 4                 | 0                    | 0             | 2                    |
| ENSG00000204463 | BAT3     | chr6:31720063:31720170:-    | 81                    | 23   | 105    | 0.511            | 19                | 33   | 110    | 0.146 | 2.50E-09             | 0                 | 0          | 0                 | 0                    | 0             | 0                    |
| ENSG00000126453 | BCL2L12  | chr19:54865285:54865557:+   | 174                   | 1    | 875    | 0.965            | 52                | 7    | 663    | 0.54  | 3.00E-09             | 0                 | 0          | 0                 | 0                    | 0             | 0                    |
| ENSG00000141002 | TCF25    | chr16:88487637:88487767:+   | 98                    | 0    | 373    | 1                | 28                | 1    | 370    | 0.881 | 4.00E-09             | 0                 | 0          | 0                 | 0                    | 0             | 0                    |
| ENSG00000023191 | RNH1     | chr11:494824:494996:-       | 53                    | 0    | 130    | 1                | 13                | 6    | 180    | 0.323 | 4.80E-09             | 0                 | 0          | 0                 | 0                    | 0             | 0                    |
| ENSG00000023330 | ALAS1    | chr3:52207728:52207904:+    | 16                    | 7    | 255    | 0.332            | 184               | 3    | 760    | 0.93  | 6.00E-09             | 0                 | 0          | 0                 | 0                    | 0             | 0                    |
| ENSG00000100138 | NHP2L1   | chr22:40408306:40408537:-   | 19                    | 51   | 204    | 0.062            | 121               | 53   | 366    | 0.29  | 7.00E-09             | 0                 | 0          | 0                 | 0                    | 0             | 0                    |
| ENSG00000023191 | RNH1     | chr11:494824:494996:-       | 48                    | 2    | 130    | 0.841            | 11                | 5    | 180    | 0.327 | 1.30E-08             | 0                 | 0          | 0                 | 0                    | 0             | 0                    |
| ENSG00000162910 | MRPL55   | chr1:226362761:226362798:-  | 8                     | 11   | 137    | 0.255            | 53                | 6    | 136    | 0.806 | 1.60E-08             | 0                 | 0          | 0                 | 0                    | 0             | 0                    |
| ENSG00000118267 | ZNF271   | chr18:31124972:31125194:+   | 118                   | 5    | 1493   | 0.813            | 29                | 2    | 1101   | 0.728 | 2.10E-08             | 0                 | 0          | 0                 | 0                    | 0             | 0                    |
| ENSG00000084234 | APLP2    | chr11:129510668:129510820:+ | 390                   | 1    | 931    | 0.989            | 404               | 39   | 1489   | 0.713 | 3.10E-08             | 7                 | 0          | 10                | 2                    | 0             | 4                    |
| ENSG00000162910 | MRPL55   | chr1:226362761:226362798:-  | 9                     | 11   | 137    | 0.278            | 60                | 25   | 136    | 0.53  | 3.10E-08             | 0                 | 0          | 0                 | 0                    | 0             | 0                    |
| ENSG00000214063 | TSPAN4   | chr11:852550:852741:+       | 133                   | 0    | 353    | 1                | 45                | 1    | 325    | 0.902 | 4.10E-08             | 2                 | 0          | 0                 | 2                    | 0             | 0                    |
| ENSG00000119596 | YLPM1    | chr14:74365669:74365799:+   | 71                    | 0    | 297    | 1                | 48                | 1    | 594    | 0.927 | 4.60E-08             | 0                 | 1          | 0                 | 0                    | 1             | 0                    |
| ENSG00000102125 | n/a      | chrX:153293617:153293745:+  | 89                    | 0    | 358    | 1                | 36                | 1    | 434    | 0.906 | 5.00E-08             | 0                 | 0          | 18                | 0                    | 0             | 3                    |
| ENSG00000065485 | PDIA5    | chr3:124332017:124332153:+  | 30                    | 0    | 116    | 1                | 10                | 1    | 269    | 0.72  | 5.60E-08             | 0                 | 0          | 0                 | 0                    | 0             | 0                    |
| ENSG0000013306  | SLC25A39 | chr17:39755702:39755746:-   | 77                    | 1    | 169    | 0.972            | 17                | 10   | 152    | 0.43  | 6.00E-08             | 0                 | 0          | 0                 | 0                    | 0             | 0                    |
| ENSG00000126351 | THRA     | chr17:35498021:35498279:+   | 76                    | 1    | 785    | 0.926            | 169               | 0    | 803    | 1     | 6.60E-08             | 0                 | 0          | 0                 | 0                    | 0             | 0                    |
| ENSG00000160688 | FLAD1    | chr1:153228660:153228807:+  | 70                    | 3    | 688    | 0.851            | 24                | 2    | 798    | 0.746 | 1.00E-07             | 7                 | 0          | 0                 | 3                    | 0             | 0                    |
| ENSG00000178802 | n/a      | chr15:72976405:72976613:+   | 239                   | 12   | 2462   | 0.794            | 77                | 15   | 1565   | 0.498 | 1.40E-07             | 0                 | 0          | 0                 | 0                    | 0             | 0                    |

|                 |          |                             |     |    |      |       |      |    |      |       |          |    |   |     |   |   |   |
|-----------------|----------|-----------------------------|-----|----|------|-------|------|----|------|-------|----------|----|---|-----|---|---|---|
| ENSG00000161939 | C17orf49 | chr17:6860953:6861057:+     | 90  | 0  | 709  | 1     | 33   | 7  | 743  | 0.587 | 1.60E-07 | 0  | 0 | 0   | 0 | 0 | 0 |
| ENSG00000130731 | C16orf13 | chr16:625613:625775:-       | 108 | 4  | 79   | 0.861 | 59   | 31 | 105  | 0.304 | 2.40E-07 | 0  | 0 | 0   | 0 | 0 | 0 |
| ENSG00000152904 | GGPS1    | chr1:233565180:233565272:+  | 49  | 1  | 574  | 0.94  | 36   | 0  | 1352 | 1     | 2.40E-07 | 0  | 0 | 0   | 0 | 0 | 0 |
| ENSG00000065665 | SEC61A2  | chr10:12237783:12237936:+   | 35  | 2  | 230  | 0.807 | 224  | 0  | 569  | 1     | 2.70E-07 | 0  | 0 | 0   | 0 | 0 | 0 |
| ENSG00000112118 | n/a      | chr6:52237992:52238142:-    | 8   | 61 | 1726 | 0.031 | 48   | 65 | 1924 | 0.151 | 4.50E-07 | 0  | 0 | 0   | 0 | 0 | 0 |
| ENSG00000070669 | ASNS     | chr7:97337026:97337061:-    | 82  | 1  | 59   | 0.975 | 115  | 12 | 221  | 0.821 | 5.70E-07 | 0  | 0 | 0   | 0 | 0 | 0 |
| ENSG00000173915 | n/a      | chr10:105145493:105145779:- | 117 | 15 | 1    | 0.543 | 75   | 47 | 1    | 0.195 | 6.20E-07 | 0  | 0 | 0   | 0 | 0 | 0 |
| ENSG00000127952 | MKSTYX   | chr7:75468144:75468256:-    | 32  | 1  | 82   | 0.902 | 15   | 9  | 192  | 0.325 | 6.30E-07 | 0  | 0 | 0   | 0 | 0 | 0 |
| ENSG00000167302 | C17orf56 | chr17:76820710:76820913:-   | 23  | 1  | 17   | 0.819 | 5    | 2  | 48   | 0.329 | 7.00E-07 | 0  | 0 | 0   | 0 | 0 | 0 |
| ENSG00000058600 | POLR3E   | chr16:22241672:22241753:+   | 39  | 0  | 149  | 1     | 14   | 4  | 245  | 0.546 | 9.70E-07 | 3  | 0 | 5   | 1 | 0 | 4 |
| ENSG00000166913 | YWHAB    | chr20:42949703:42949797:+   | 16  | 24 | 980  | 0.175 | 79   | 33 | 1403 | 0.432 | 9.80E-07 | 0  | 0 | 0   | 0 | 0 | 0 |
| ENSG00000141480 | ARRB2    | chr17:4568305:4568389:+     | 98  | 3  | 284  | 0.917 | 35   | 14 | 266  | 0.458 | 1.10E-06 | 0  | 0 | 0   | 0 | 0 | 0 |
| ENSG00000013306 | SLC25A39 | chr17:39755702:39755746:-   | 100 | 2  | 138  | 0.957 | 23   | 7  | 104  | 0.594 | 1.10E-06 | 0  | 0 | 0   | 0 | 0 | 0 |
| ENSG00000188917 | CXorf34  | chrX:100192896:100193378:-  | 23  | 1  | 31   | 0.695 | 92   | 0  | 23   | 1     | 1.30E-06 | 0  | 0 | 0   | 0 | 0 | 0 |
| ENSG00000162735 | PEX19    | chr1:158519944:158520053:-  | 57  | 0  | 75   | 1     | 17   | 8  | 89   | 0.384 | 1.60E-06 | 0  | 0 | 0   | 0 | 0 | 0 |
| ENSG00000177697 | CD151    | chr11:824530:824591:+       | 79  | 21 | 414  | 0.596 | 10   | 23 | 214  | 0.145 | 1.70E-06 | 0  | 0 | 0   | 0 | 0 | 0 |
| ENSG00000106829 | TLE4     | chr9:81511858:81511953:+    | 3   | 10 | 252  | 0.087 | 35   | 7  | 313  | 0.613 | 1.90E-06 | 0  | 0 | 0   | 0 | 0 | 0 |
| ENSG00000111652 | COPS7A   | chr12:6707353:6707428:+     | 61  | 2  | 309  | 0.916 | 12   | 17 | 233  | 0.201 | 2.00E-06 | 0  | 0 | 0   | 0 | 0 | 0 |
| ENSG00000106628 | POLD2    | chr7:44122239:44122396:-    | 217 | 0  | 17   | 1     | 152  | 3  | 44   | 0.922 | 2.40E-06 | 0  | 0 | 0   | 0 | 0 | 0 |
| ENSG00000108509 | CAMTA2   | chr17:4817604:4817788:-     | 50  | 0  | 12   | 1     | 6    | 2  | 16   | 0.387 | 2.40E-06 | 0  | 0 | 0   | 0 | 0 | 0 |
| ENSG00000110536 | PTPMT1   | chr11:47547828:47548019:+   | 235 | 13 | 1050 | 0.788 | 192  | 25 | 1399 | 0.612 | 2.60E-06 | 0  | 0 | 2   | 0 | 0 | 2 |
| ENSG00000182087 | C19orf6  | chr19:962095:962194:-       | 178 | 0  | 2005 | 1     | 85   | 3  | 1782 | 0.898 | 2.70E-06 | 0  | 0 | 0   | 0 | 0 | 0 |
| ENSG00000197586 | ENTPD6   | chr20:25151474:25151614:+   | 91  | 0  | 403  | 1     | 43   | 1  | 469  | 0.916 | 2.90E-06 | 0  | 0 | 1   | 0 | 0 | 1 |
| ENSG00000143774 | GUK1     | chr1:226395448:226395612:+  | 62  | 41 | 824  | 0.256 | 19   | 18 | 839  | 0.194 | 3.50E-06 | 0  | 0 | 19  | 0 | 0 | 0 |
| ENSG00000116750 | n/a      | chr1:191263628:191263708:-  | 19  | 15 | 39   | 0.305 | 4    | 35 | 82   | 0.038 | 3.60E-06 | 0  | 0 | 0   | 0 | 0 | 0 |
| ENSG00000100083 | GGA1     | chr22:36350922:36351029:+   | 69  | 0  | 299  | 1     | 16   | 1  | 241  | 0.826 | 4.70E-06 | 40 | 0 | 114 | 4 | 0 | 4 |
| ENSG00000117448 | AKR1A1   | chr1:45806744:45806943:+    | 187 | 3  | 484  | 0.925 | 16   | 7  | 127  | 0.313 | 5.10E-06 | 0  | 0 | 0   | 0 | 0 | 0 |
| ENSG00000072778 | ACADVL   | chr17:7067687:7067773:+     | 149 | 0  | 319  | 1     | 111  | 2  | 459  | 0.949 | 5.40E-06 | 0  | 2 | 0   | 0 | 1 | 0 |
| ENSG00000178802 | n/a      | chr15:72969921:72970048:+   | 197 | 1  | 601  | 0.981 | 90   | 5  | 506  | 0.828 | 9.40E-06 | 0  | 0 | 8   | 0 | 0 | 4 |
| ENSG00000154380 | ENAH     | chr1:223759316:223759378:-  | 4   | 2  | 30   | 0.438 | 28   | 1  | 19   | 0.916 | 1.00E-05 | 0  | 0 | 0   | 0 | 0 | 0 |
| ENSG00000197586 | ENTPD6   | chr20:25149868:25149969:+   | 62  | 3  | 392  | 0.863 | 25   | 0  | 451  | 1     | 1.40E-05 | 0  | 0 | 0   | 0 | 0 | 0 |
| ENSG00000138668 | HNRNPD   | chr4:83496714:83496860:-    | 121 | 95 | 243  | 0.238 | 246  | 74 | 313  | 0.449 | 1.80E-05 | 0  | 0 | 0   | 0 | 0 | 0 |
| ENSG00000135473 | PAN2     | chr12:54998288:54998485:-   | 81  | 1  | 227  | 0.942 | 41   | 10 | 274  | 0.451 | 2.00E-05 | 0  | 0 | 0   | 0 | 0 | 0 |
| ENSG00000131469 | RPL27    | chr17:38405476:38405645:+   | 932 | 24 | 3523 | 0.897 | 1360 | 73 | 4143 | 0.806 | 2.10E-05 | 0  | 2 | 0   | 0 | 2 | 0 |
| ENSG00000169241 | RAG1API  | chr1:153376661:153376822:+  | 107 | 2  | 405  | 0.925 | 34   | 0  | 307  | 1     | 2.10E-05 | 0  | 0 | 0   | 0 | 0 | 0 |
| ENSG00000162910 | MRPL55   | chr1:226363279:226363345:-  | 66  | 11 | 137  | 0.694 | 24   | 25 | 136  | 0.266 | 2.20E-05 | 0  | 0 | 0   | 0 | 0 | 0 |
| ENSG00000010270 | n/a      | chr7:38185217:38185272:+    | 11  | 6  | 398  | 0.428 | 0    | 15 | 640  | 0     | 2.80E-05 | 0  | 0 | 0   | 0 | 0 | 0 |
| ENSG00000115226 | FNDC4    | chr2:27569037:27569161:-    | 26  | 0  | 68   | 1     | 6    | 3  | 96   | 0.352 | 2.90E-05 | 0  | 0 | 0   | 0 | 0 | 0 |
| ENSG00000169689 | STRA13   | chr17:77570806:77570859:-   | 67  | 33 | 175  | 0.457 | 41   | 96 | 218  | 0.15  | 2.90E-05 | 0  | 0 | 0   | 0 | 0 | 0 |
| ENSG00000151500 | THYN1    | chr11:133623913:133624063:- | 86  | 1  | 106  | 0.954 | 32   | 11 | 100  | 0.413 | 2.90E-05 | 0  | 0 | 0   | 0 | 0 | 0 |
| ENSG00000171163 | ZNF692   | chr1:247111504:247111603:-  | 43  | 0  | 173  | 1     | 14   | 8  | 196  | 0.351 | 3.00E-05 | 0  | 0 | 0   | 0 | 0 | 0 |
| ENSG00000214021 | TLL3     | chr3:9832758:9832886:+      | 38  | 1  | 186  | 0.91  | 6    | 0  | 159  | 1     | 3.20E-05 | 0  | 0 | 0   | 0 | 0 | 0 |
| ENSG00000141556 | TBCD     | chr17:78458926:78458986:+   | 52  | 0  | 160  | 1     | 17   | 1  | 175  | 0.87  | 3.20E-05 | 4  | 0 | 18  | 2 | 0 | 4 |
| ENSG00000169241 | RAG1API  | chr1:153375928:153376051:+  | 95  | 11 | 351  | 0.702 | 104  | 0  | 196  | 1     | 3.30E-05 | 0  | 1 | 0   | 0 | 1 | 0 |
| ENSG00000100151 | PICK1    | chr22:36799726:36799776:+   | 42  | 0  | 206  | 1     | 25   | 5  | 360  | 0.68  | 3.40E-05 | 0  | 0 | 0   | 0 | 0 | 0 |
| ENSG00000169241 | RAG1API  | chr1:153376661:153376822:+  | 111 | 0  | 321  | 1     | 42   | 10 | 261  | 0.492 | 3.40E-05 | 0  | 0 | 0   | 0 | 0 | 0 |
| ENSG00000099991 | CABIN1   | chr22:22902079:22902243:+   | 84  | 0  | 616  | 1     | 65   | 2  | 979  | 0.881 | 3.50E-05 | 0  | 0 | 34  | 0 | 0 | 4 |
| ENSG00000177830 | CHD1     | chr11:883427:883519:-       | 132 | 3  | 115  | 0.934 | 77   | 26 | 122  | 0.488 | 4.70E-05 | 0  | 0 | 0   | 0 | 0 | 0 |

|                 |          |                             |     |     |      |       |     |     |      |       |          |    |    |    |   |   |   |
|-----------------|----------|-----------------------------|-----|-----|------|-------|-----|-----|------|-------|----------|----|----|----|---|---|---|
| ENSG00000119688 | PMP69    | chr14:73829610:73829704:-   | 29  | 2   | 41   | 0.822 | 8   | 2   | 63   | 0.56  | 5.30E-05 | 0  | 0  | 0  | 0 | 0 | 0 |
| ENSG00000076928 | ARHGFE1  | chr19:47101167:47101253:+   | 34  | 0   | 58   | 1     | 20  | 4   | 122  | 0.625 | 5.50E-05 | 0  | 0  | 0  | 0 | 0 | 0 |
| ENSG00000123159 | GIPC1    | chr19:14454501:14454818:-   | 245 | 2   | 232  | 0.945 | 210 | 7   | 328  | 0.808 | 5.50E-05 | 0  | 0  | 0  | 0 | 0 | 0 |
| ENSG00000125695 | LYK5     | chr17:59138339:59138510:-   | 61  | 1   | 12   | 0.931 | 19  | 4   | 19   | 0.513 | 5.50E-05 | 0  | 0  | 0  | 0 | 0 | 0 |
| ENSG00000089154 | GCN1L1   | chr12:119053372:119053520:- | 168 | 0   | 99   | 1     | 44  | 5   | 61   | 0.682 | 5.90E-05 | 0  | 0  | 0  | 0 | 0 | 0 |
| ENSG00000175061 | C17orf45 | chr17:16283699:16283742:+   | 203 | 250 | 3603 | 0.267 | 144 | 359 | 3896 | 0.152 | 7.40E-05 | 0  | 0  | 0  | 0 | 0 | 0 |
| ENSG00000110514 | MADD     | chr11:47304865:47304934:+   | 19  | 0   | 129  | 1     | 8   | 1   | 282  | 0.748 | 7.60E-05 | 1  | 0  | 43 | 1 | 0 | 4 |
| ENSG00000168724 | DNAJC21  | chr5:34985405:34985539:+    | 5   | 4   | 111  | 0.245 | 34  | 3   | 133  | 0.746 | 8.00E-05 | 0  | 44 | 0  | 0 | 4 | 0 |
| ENSG00000120913 | PDLIM2   | chr8:22505009:22505126:+    | 27  | 0   | 254  | 1     | 3   | 5   | 204  | 0.144 | 8.60E-05 | 0  | 0  | 0  | 0 | 0 | 0 |
| ENSG00000198715 | C1orf85  | chr1:154531174:154531431:-  | 139 | 0   | 143  | 1     | 32  | 5   | 78   | 0.514 | 8.80E-05 | 0  | 0  | 0  | 0 | 0 | 0 |
| ENSG00000070047 | KIAA1542 | chr11:595605:595724:+       | 20  | 0   | 79   | 1     | 6   | 4   | 133  | 0.295 | 1.00E-04 | 0  | 0  | 0  | 0 | 0 | 0 |
| ENSG00000101294 | HM13     | chr20:29606210:29606293:+   | 171 | 2   | 598  | 0.967 | 159 | 7   | 890  | 0.885 | 1.00E-04 | 1  | 0  | 0  | 1 | 0 | 0 |
| ENSG00000132819 | RBM38    | chr20:55401741:55401795:+   | 41  | 0   | 1956 | 1     | 19  | 11  | 2610 | 0.416 | 1.00E-04 | 22 | 0  | 0  | 3 | 0 | 0 |
| ENSG00000123374 | CDK2     | chr12:54649526:54649627:+   | 89  | 1   | 582  | 0.965 | 67  | 12  | 836  | 0.631 | 1.10E-04 | 4  | 5  | 0  | 3 | 2 | 0 |
| ENSG00000093167 | LRRFIP2  | chr3:37107962:37108033:-    | 2   | 4   | 43   | 0.155 | 18  | 2   | 32   | 0.767 | 1.10E-04 | 0  | 0  | 0  | 0 | 0 | 0 |
| ENSG00000089159 | n/a      | chr12:119137746:119137847:- | 5   | 3   | 22   | 0.338 | 29  | 1   | 16   | 0.899 | 1.20E-04 | 0  | 0  | 0  | 0 | 0 | 0 |
| ENSG00000177697 | CD151    | chr11:824530:824591:+       | 65  | 2   | 415  | 0.927 | 10  | 4   | 214  | 0.495 | 1.30E-04 | 0  | 0  | 0  | 0 | 0 | 0 |
| ENSG00000183010 | PIG45    | chr17:77486504:77486683:-   | 536 | 0   | 591  | 1     | 409 | 7   | 623  | 0.926 | 1.30E-04 | 0  | 0  | 0  | 0 | 0 | 0 |
| ENSG00000165948 | FAM14B   | chr14:93637913:93638074:+   | 80  | 0   | 431  | 1     | 34  | 1   | 411  | 0.887 | 1.30E-04 | 0  | 0  | 0  | 0 | 0 | 0 |
| ENSG00000102710 | P38IP    | chr13:36482689:36482792:-   | 6   | 8   | 70   | 0.185 | 41  | 7   | 101  | 0.639 | 1.40E-04 | 0  | 0  | 0  | 0 | 0 | 0 |
| ENSG00000100416 | MTU1     | chr22:45130551:45130633:+   | 38  | 0   | 518  | 1     | 12  | 10  | 538  | 0.291 | 1.40E-04 | 0  | 0  | 1  | 0 | 0 | 1 |
| ENSG00000116898 | MRPS15   | chr1:36700276:36700351:-    | 141 | 1   | 23   | 0.981 | 75  | 13  | 26   | 0.673 | 1.40E-04 | 0  | 0  | 0  | 0 | 0 | 0 |
| ENSG00000143537 | ADAM15   | chr1:153300515:153300589:+  | 27  | 9   | 316  | 0.519 | 4   | 17  | 271  | 0.078 | 1.40E-04 | 0  | 0  | 0  | 0 | 0 | 0 |
| ENSG00000187741 | FANCA    | chr16:88352486:88352614:-   | 59  | 0   | 6    | 1     | 19  | 2   | 13   | 0.717 | 1.50E-04 | 0  | 0  | 19 | 0 | 0 | 0 |
| ENSG00000198917 | C9orf114 | chr9:130625847:130625994:-  | 67  | 1   | 598  | 0.942 | 28  | 2   | 593  | 0.774 | 1.60E-04 | 0  | 0  | 0  | 0 | 0 | 0 |
| ENSG00000175279 | APITD1   | chr1:10416486:10416609:+    | 53  | 0   | 148  | 1     | 33  | 2   | 232  | 0.818 | 1.60E-04 | 0  | 0  | 0  | 0 | 0 | 0 |
| ENSG0000010219  | DYRK4    | chr12:4586754:4586814:+     | 1   | 6   | 241  | 0.062 | 17  | 6   | 258  | 0.528 | 1.80E-04 | 0  | 0  | 7  | 0 | 0 | 2 |
| ENSG00000136295 | TTYH3    | chr7:2662252:2662344:+      | 66  | 0   | 239  | 1     | 20  | 5   | 191  | 0.563 | 1.80E-04 | 0  | 0  | 0  | 0 | 0 | 0 |
| ENSG00000085733 | CTTN     | chr11:69945224:69945334:+   | 67  | 4   | 498  | 0.83  | 116 | 3   | 467  | 0.919 | 2.00E-04 | 0  | 2  | 0  | 0 | 1 | 0 |
| ENSG00000169683 | LRRC45   | chr17:77580708:77580800:+   | 61  | 0   | 238  | 1     | 42  | 3   | 365  | 0.818 | 2.20E-04 | 0  | 0  | 0  | 0 | 0 | 0 |
| ENSG00000160767 | C1orf2   | chr1:153486691:153487236:-  | 451 | 0   | 26   | 1     | 202 | 4   | 29   | 0.819 | 2.30E-04 | 0  | 0  | 0  | 0 | 0 | 0 |
| ENSG00000103275 | UBE2I    | chr16:1302349:1302605:+     | 37  | 28  | 437  | 0.18  | 123 | 27  | 742  | 0.43  | 2.30E-04 | 1  | 0  | 0  | 1 | 0 | 0 |
| ENSG00000159352 | PSMD4    | chr1:149501261:149501401:+  | 22  | 1   | 249  | 0.847 | 11  | 1   | 497  | 0.735 | 2.40E-04 | 0  | 0  | 0  | 0 | 0 | 0 |
| ENSG00000180964 | TCEAL8   | chrX:102396189:102396261:-  | 56  | 1   | 676  | 0.953 | 21  | 6   | 639  | 0.56  | 2.40E-04 | 0  | 0  | 0  | 0 | 0 | 0 |
| ENSG00000125482 | TTF1     | chr9:134266663:134268036:-  | 191 | 0   | 34   | 1     | 224 | 7   | 83   | 0.552 | 2.60E-04 | 0  | 0  | 0  | 0 | 0 | 0 |
| ENSG00000196476 | C20orf96 | chr20:218200:218317:-       | 20  | 1   | 13   | 0.849 | 11  | 7   | 37   | 0.307 | 2.60E-04 | 0  | 0  | 0  | 0 | 0 | 0 |
| ENSG00000108840 | HDAC5    | chr17:39517916:39518049:-   | 72  | 0   | 54   | 1     | 14  | 2   | 36   | 0.646 | 2.70E-04 | 0  | 0  | 0  | 0 | 0 | 0 |
| ENSG00000197694 | SPTAN1   | chr9:130395083:130395142:+  | 11  | 7   | 266  | 0.384 | 56  | 1   | 434  | 0.957 | 2.80E-04 | 0  | 0  | 0  | 0 | 0 | 0 |
| ENSG00000064490 | REFANK   | chr19:19170466:19170532:+   | 103 | 0   | 281  | 1     | 34  | 1   | 199  | 0.928 | 3.20E-04 | 0  | 0  | 0  | 0 | 0 | 0 |
| ENSG00000142327 | RNPEPL1  | chr2:241161865:241161981:+  | 53  | 0   | 294  | 1     | 17  | 2   | 256  | 0.706 | 3.20E-04 | 0  | 0  | 0  | 0 | 0 | 0 |
| ENSG00000198715 | C1orf85  | chr1:154529735:154529991:-  | 207 | 1   | 354  | 0.972 | 68  | 1   | 209  | 0.918 | 3.20E-04 | 0  | 0  | 0  | 0 | 0 | 0 |
| ENSG00000108272 | MGC4172  | chr17:32030213:32030305:+   | 44  | 1   | 200  | 0.934 | 6   | 0   | 119  | 1     | 3.20E-04 | 0  | 0  | 0  | 0 | 0 | 0 |
| ENSG00000115694 | STK25    | chr2:242096094:242096223:-  | 132 | 0   | 51   | 1     | 25  | 10  | 21   | 0.399 | 3.30E-04 | 0  | 0  | 0  | 0 | 0 | 0 |
| ENSG00000102030 | ARD1A    | chrX:152850718:152850762:-  | 192 | 0   | 253  | 1     | 40  | 4   | 107  | 0.816 | 3.30E-04 | 0  | 0  | 0  | 0 | 0 | 0 |
| ENSG00000117335 | CD46     | chr1:206030221:206030313:+  | 10  | 19  | 1853 | 0.145 | 55  | 16  | 3271 | 0.525 | 3.60E-04 | 0  | 0  | 0  | 0 | 0 | 0 |
| ENSG00000083457 | ITGAE    | chr17:3573331:3573426:-     | 4   | 8   | 30   | 0.137 | 26  | 7   | 30   | 0.54  | 3.70E-04 | 0  | 0  | 0  | 0 | 0 | 0 |
| ENSG00000119139 | TJP2     | chr9:71054111:71054221:+    | 24  | 0   | 136  | 1     | 16  | 1   | 300  | 0.824 | 3.80E-04 | 0  | 0  | 0  | 0 | 0 | 0 |
| ENSG00000137817 | PARP6    | chr15:70330240:70330349:-   | 37  | 1   | 23   | 0.916 | 5   | 2   | 20   | 0.423 | 4.00E-04 | 0  | 0  | 0  | 0 | 0 | 0 |

|                 |             |                             |     |    |      |       |     |    |      |       |          |    |   |    |   |   |   |
|-----------------|-------------|-----------------------------|-----|----|------|-------|-----|----|------|-------|----------|----|---|----|---|---|---|
| ENSG00000167130 | DOLPP1      | chr9:130888239:130888367:+  | 55  | 0  | 105  | 1     | 30  | 4  | 141  | 0.667 | 4.00E-04 | 0  | 0 | 0  | 0 | 0 | 0 |
| ENSG00000122406 | RPL5        | chr1:93071534:93071603:+    | 30  | 3  | 479  | 0.788 | 82  | 4  | 604  | 0.884 | 4.00E-04 | 1  | 0 | 0  | 1 | 0 | 0 |
| ENSG00000137817 | DKFZp566D24 | chr15:70330240:70330352:-   | 36  | 1  | 23   | 0.912 | 5   | 2  | 20   | 0.419 | 4.20E-04 | 0  | 0 | 0  | 0 | 0 | 0 |
| ENSG00000141480 | ARRB2       | chr17:4565057:4565087:+     | 27  | 10 | 363  | 0.574 | 8   | 5  | 420  | 0.444 | 4.30E-04 | 13 | 0 | 2  | 3 | 0 | 2 |
| ENSG00000125648 | SLC25A23    | chr19:6404992:6405099:-     | 80  | 1  | 44   | 0.96  | 77  | 8  | 94   | 0.74  | 4.50E-04 | 0  | 0 | 0  | 0 | 0 | 0 |
| ENSG00000141551 | CSNK1D      | chr17:77797141:77797204:-   | 58  | 5  | 434  | 0.818 | 36  | 14 | 579  | 0.498 | 4.60E-04 | 0  | 0 | 0  | 0 | 0 | 0 |
| ENSG00000173653 | RCE1        | chr11:66369547:66369609:+   | 31  | 2  | 541  | 0.858 | 12  | 14 | 675  | 0.25  | 4.60E-04 | 0  | 0 | 0  | 0 | 0 | 0 |
| ENSG00000100023 | PPIL2       | chr22:20378105:20378161:+   | 28  | 0  | 283  | 1     | 19  | 1  | 555  | 0.885 | 4.70E-04 | 2  | 0 | 0  | 1 | 0 | 0 |
| ENSG00000069188 | SDK2        | chr17:68860207:68860371:-   | 28  | 0  | 7    | 1     | 17  | 2  | 24   | 0.659 | 4.80E-04 | 0  | 0 | 0  | 0 | 0 | 0 |
| ENSG00000087460 | GNASL       | chr20:56907391:56907435:+   | 245 | 54 | 1199 | 0.668 | 418 | 64 | 1505 | 0.744 | 4.90E-04 | 7  | 0 | 10 | 3 | 0 | 2 |
| ENSG00000084234 | APLP2       | chr11:129498717:129498884:+ | 107 | 26 | 1284 | 0.481 | 253 | 43 | 2004 | 0.57  | 4.90E-04 | 0  | 0 | 0  | 0 | 0 | 0 |
| ENSG00000100207 | TCF20       | chr22:40894559:40894686:-   | 17  | 3  | 191  | 0.603 | 75  | 0  | 335  | 1     | 5.10E-04 | 0  | 0 | 0  | 0 | 0 | 0 |
| ENSG00000063854 | HAGH        | chr16:1809117:1809225:-     | 92  | 0  | 60   | 1     | 33  | 9  | 47   | 0.519 | 5.10E-04 | 0  | 0 | 0  | 0 | 0 | 0 |
| ENSG00000143569 | n/a         | chr1:152508462:152508512:+  | 4   | 8  | 277  | 0.175 | 20  | 6  | 239  | 0.586 | 5.20E-04 | 0  | 0 | 0  | 0 | 0 | 0 |
| ENSG00000063601 | MTMR1       | chrX:149674819:149674995:+  | 65  | 0  | 370  | 1     | 49  | 1  | 563  | 0.914 | 5.70E-04 | 3  | 0 | 0  | 1 | 0 | 0 |
| ENSG00000089351 | GRAMD1A     | chr19:40196000:40196112:+   | 65  | 0  | 331  | 1     | 17  | 1  | 224  | 0.831 | 5.70E-04 | 3  | 0 | 0  | 2 | 0 | 0 |
| ENSG00000165280 | FANCG       | chr9:35068138:35068340:-    | 100 | 0  | 41   | 1     | 34  | 4  | 36   | 0.626 | 6.00E-04 | 0  | 0 | 0  | 0 | 0 | 0 |
| ENSG00000099875 | MKNK2       | chr19:1991133:1991176:-     | 33  | 0  | 171  | 1     | 152 | 6  | 382  | 0.919 | 6.10E-04 | 0  | 0 | 0  | 0 | 0 | 0 |
| ENSG00000071626 | DAZAP1      | chr19:1376877:1376959:+     | 219 | 5  | 2237 | 0.937 | 294 | 1  | 2182 | 0.99  | 6.50E-04 | 0  | 0 | 4  | 0 | 0 | 2 |
| ENSG00000184277 | BLP2        | chr15:10009422:10009499:-   | 28  | 19 | 173  | 0.342 | 71  | 10 | 204  | 0.714 | 6.60E-04 | 0  | 0 | 0  | 0 | 0 | 0 |
| ENSG00000102098 | SCML2       | chrX:18170480:18170631:-    | 11  | 2  | 19   | 0.569 | 4   | 3  | 57   | 0.243 | 7.00E-04 | 0  | 0 | 0  | 0 | 0 | 0 |
| ENSG00000169241 | RAG1AP1     | chr1:153375928:153376051:+  | 80  | 2  | 405  | 0.916 | 106 | 0  | 307  | 1     | 7.00E-04 | 0  | 1 | 0  | 0 | 1 | 0 |
| ENSG00000108671 | PSMD11      | chr17:27830982:27831017:+   | 27  | 0  | 95   | 1     | 32  | 19 | 288  | 0.446 | 7.40E-04 | 0  | 0 | 0  | 0 | 0 | 0 |
| ENSG00000139546 | TARBP2      | chr12:52185186:52185313:+   | 60  | 1  | 220  | 0.941 | 26  | 2  | 221  | 0.777 | 8.70E-04 | 0  | 0 | 0  | 0 | 0 | 0 |
| ENSG00000129484 | PARP2       | chr14:19895395:19895519:+   | 56  | 1  | 325  | 0.938 | 186 | 0  | 626  | 1     | 8.80E-04 | 0  | 0 | 0  | 0 | 0 | 0 |
| ENSG00000005486 | RHBDD2      | chr7:75348619:75348740:+    | 23  | 14 | 612  | 0.312 | 15  | 41 | 1184 | 0.092 | 9.20E-04 | 0  | 0 | 0  | 0 | 0 | 0 |
| ENSG00000102858 | MGRN1       | chr16:4667465:4667574:+     | 37  | 0  | 204  | 1     | 19  | 1  | 281  | 0.848 | 9.40E-04 | 0  | 0 | 3  | 0 | 0 | 1 |
| ENSG00000108591 | DRG2        | chr17:17943672:17943762:+   | 69  | 0  | 228  | 1     | 39  | 1  | 265  | 0.927 | 9.50E-04 | 2  | 0 | 9  | 1 | 0 | 3 |
| ENSG00000162910 | MRPL55      | chr1:226363279:226363345:-  | 64  | 11 | 137  | 0.688 | 26  | 6  | 136  | 0.621 | 9.80E-04 | 0  | 0 | 0  | 0 | 0 | 0 |
| ENSG00000169188 | APEX2       | chrX:55046120:55046266:+    | 72  | 0  | 134  | 1     | 52  | 1  | 197  | 0.927 | 1.00E-03 | 0  | 0 | 0  | 0 | 0 | 0 |
| ENSG00000105771 | C19orf61    | chr19:48940764:48940876:-   | 49  | 2  | 21   | 0.876 | 16  | 2  | 27   | 0.698 | 1.00E-03 | 0  | 0 | 0  | 0 | 0 | 0 |
| ENSG00000105397 | TYK2        | chr19:10325204:10325322:-   | 72  | 2  | 74   | 0.91  | 25  | 0  | 68   | 1     | 1.10E-03 | 0  | 0 | 0  | 0 | 0 | 0 |
| ENSG00000178188 | SH2B1       | chr16:28791992:28792091:+   | 88  | 0  | 773  | 1     | 75  | 2  | 1119 | 0.921 | 1.20E-03 | 0  | 0 | 0  | 0 | 0 | 0 |
| ENSG00000125503 | PPP1R12C    | chr19:60299442:60299515:-   | 28  | 0  | 26   | 1     | 8   | 3  | 31   | 0.491 | 1.30E-03 | 0  | 0 | 0  | 0 | 0 | 0 |
| ENSG00000171603 | CLSTN1      | chr1:9720143:9720199:-      | 4   | 6  | 95   | 0.213 | 26  | 5  | 126  | 0.678 | 1.30E-03 | 0  | 0 | 0  | 0 | 0 | 0 |
| ENSG00000178188 | SH2B1       | chr16:28791992:28792091:+   | 90  | 0  | 773  | 1     | 77  | 4  | 1119 | 0.856 | 1.40E-03 | 0  | 0 | 0  | 0 | 0 | 0 |
| ENSG00000100207 | n/a         | chr22:40894559:40894653:-   | 15  | 3  | 44   | 0.614 | 58  | 0  | 60   | 1     | 1.40E-03 | 0  | 0 | 0  | 0 | 0 | 0 |
| ENSG00000100379 | KCTD17      | chr22:35787525:35787615:+   | 45  | 0  | 1043 | 1     | 19  | 1  | 1047 | 0.861 | 1.40E-03 | 0  | 0 | 8  | 0 | 0 | 3 |
| ENSG00000115486 | GGCX        | chr2:85641449:85641619:-    | 52  | 1  | 61   | 0.92  | 35  | 12 | 88   | 0.393 | 1.40E-03 | 0  | 0 | 0  | 0 | 0 | 0 |
| ENSG00000105698 | USF2        | chr19:40452546:40452746:+   | 154 | 7  | 638  | 0.814 | 146 | 16 | 906  | 0.644 | 1.40E-03 | 0  | 1 | 0  | 0 | 1 | 0 |
| ENSG00000083845 | RPS5        | chr19:63596155:63596364:+   | 181 | 3  | 1543 | 0.921 | 381 | 15 | 2382 | 0.83  | 1.40E-03 | 0  | 0 | 0  | 0 | 0 | 0 |
| ENSG00000082014 | SMARCD3     | chr7:150573479:150573690:-  | 38  | 0  | 1    | 1     | 27  | 9  | 2    | 0.364 | 1.50E-03 | 0  | 0 | 0  | 0 | 0 | 0 |
| ENSG00000100350 | FOXRED2     | chr22:35230091:35230360:-   | 136 | 2  | 103  | 0.916 | 63  | 2  | 93   | 0.834 | 1.50E-03 | 0  | 0 | 0  | 0 | 0 | 0 |
| ENSG00000115204 | MPV17       | chr2:27388586:27388618:-    | 21  | 0  | 452  | 1     | 6   | 1  | 514  | 0.747 | 1.50E-03 | 0  | 0 | 0  | 0 | 0 | 0 |
| ENSG00000072071 | LPHN1       | chr19:14132405:14132508:-   | 34  | 0  | 34   | 1     | 9   | 4  | 32   | 0.405 | 1.50E-03 | 0  | 0 | 0  | 0 | 0 | 0 |
| ENSG00000123562 | MORF4L2     | chrX:102826265:102826313:-  | 43  | 22 | 146  | 0.457 | 34  | 69 | 226  | 0.175 | 1.50E-03 | 0  | 0 | 0  | 0 | 0 | 0 |
| ENSG00000132716 | WDR42A      | chr1:158461476:158461533:-  | 33  | 1  | 11   | 0.93  | 18  | 3  | 25   | 0.707 | 1.50E-03 | 0  | 0 | 0  | 0 | 0 | 0 |
| ENSG00000171311 | EXOSC1      | chr10:99192984:99193058:-   | 73  | 0  | 28   | 1     | 44  | 1  | 44   | 0.94  | 1.60E-03 | 0  | 0 | 0  | 0 | 0 | 0 |

|                 |           |                             |      |    |      |       |     |    |      |       |          |     |   |   |   |   |   |
|-----------------|-----------|-----------------------------|------|----|------|-------|-----|----|------|-------|----------|-----|---|---|---|---|---|
| ENSG00000129250 | KIF1C     | chr17:4844239:4844371:+     | 98   | 0  | 168  | 1     | 30  | 3  | 108  | 0.724 | 1.60E-03 | 0   | 0 | 0 | 0 | 0 | 0 |
| ENSG00000124357 | NAGK      | chr2:71151140:71151224:+    | 46   | 0  | 184  | 1     | 30  | 4  | 264  | 0.717 | 1.70E-03 | 0   | 0 | 0 | 0 | 0 | 0 |
| ENSG00000144524 | COPS7B    | chr2:232364687:232364762:+  | 25   | 0  | 192  | 1     | 91  | 2  | 331  | 0.942 | 1.70E-03 | 4   | 0 | 0 | 1 | 0 | 0 |
| ENSG00000112983 | BRD8      | chr5:137532058:137532276:-  | 82   | 1  | 73   | 0.939 | 22  | 4  | 47   | 0.507 | 1.70E-03 | 0   | 0 | 0 | 0 | 0 | 0 |
| ENSG00000100281 | HMG2L1    | chr22:33989975:33990089:+   | 19   | 3  | 482  | 0.644 | 66  | 0  | 747  | 1     | 1.70E-03 | 0   | 2 | 0 | 0 | 1 | 0 |
| ENSG00000171720 | HDAC3     | chr5:140985436:140985515:-  | 84   | 0  | 125  | 1     | 18  | 5  | 63   | 0.556 | 1.80E-03 | 0   | 0 | 0 | 0 | 0 | 0 |
| ENSG00000197111 | PCBP2     | chr12:52145983:52146024:+   | 105  | 0  | 424  | 1     | 206 | 5  | 538  | 0.949 | 1.80E-03 | 0   | 0 | 0 | 0 | 0 | 0 |
| ENSG00000164405 | UOCRQ     | chr5:132230460:132230626:+  | 1312 | 2  | 2066 | 0.993 | 957 | 15 | 1768 | 0.935 | 1.80E-03 | 0   | 4 | 0 | 0 | 2 | 0 |
| ENSG00000015475 | n/a       | chr22:16612871:16612940:-   | 33   | 0  | 59   | 1     | 25  | 2  | 117  | 0.823 | 1.80E-03 | 0   | 0 | 0 | 0 | 0 | 0 |
| ENSG00000180900 | SCRIB     | chr8:144961710:144961772:-  | 73   | 1  | 40   | 0.966 | 26  | 5  | 35   | 0.669 | 1.80E-03 | 0   | 0 | 0 | 0 | 0 | 0 |
| ENSG00000163719 | MTMR14    | chr3:9706648:9706827:+      | 40   | 1  | 591  | 0.896 | 18  | 7  | 635  | 0.356 | 1.90E-03 | 0   | 0 | 1 | 0 | 0 | 1 |
| ENSG00000159079 | n/a       | chr21:32896453:32896548:-   | 152  | 0  | 138  | 1     | 89  | 2  | 140  | 0.934 | 1.90E-03 | 0   | 0 | 0 | 0 | 0 | 0 |
| ENSG00000149923 | PPP4C     | chr16:30000081:30000132:+   | 160  | 3  | 783  | 0.957 | 167 | 8  | 1183 | 0.898 | 2.00E-03 | 3   | 0 | 0 | 1 | 0 | 0 |
| ENSG00000161091 | C19orf28  | chr19:3493774:3493975:-     | 34   | 3  | 210  | 0.692 | 144 | 3  | 475  | 0.905 | 2.00E-03 | 0   | 0 | 0 | 0 | 0 | 0 |
| ENSG00000186111 | PIP5K1C   | chr19:3584435:3584518:-     | 9    | 2  | 470  | 0.604 | 1   | 5  | 683  | 0.064 | 2.00E-03 | 0   | 0 | 0 | 0 | 0 | 0 |
| ENSG00000141556 | TBCD      | chr17:78489214:78489301:+   | 101  | 1  | 469  | 0.971 | 23  | 1  | 225  | 0.884 | 2.00E-03 | 0   | 0 | 0 | 0 | 0 | 0 |
| ENSG00000119777 | TMEM214   | chr2:27116113:27116209:+    | 74   | 0  | 294  | 1     | 20  | 6  | 175  | 0.512 | 2.00E-03 | 0   | 0 | 0 | 0 | 0 | 0 |
| ENSG00000060069 | CTDP1     | chr18:75589895:75590057:+   | 13   | 1  | 117  | 0.749 | 22  | 0  | 647  | 1     | 2.00E-03 | 0   | 0 | 0 | 0 | 0 | 0 |
| ENSG00000105613 | MAST1     | chr19:12812260:12812348:+   | 16   | 0  | 33   | 1     | 7   | 3  | 62   | 0.435 | 2.10E-03 | 0   | 0 | 0 | 0 | 0 | 0 |
| ENSG00000197111 | PCBP2     | chr12:52147856:52147894:+   | 169  | 1  | 442  | 0.987 | 255 | 9  | 452  | 0.93  | 2.10E-03 | 0   | 0 | 1 | 0 | 0 | 1 |
| ENSG00000173511 | VEGFB     | chr11:63759861:63760057:+   | 146  | 0  | 243  | 1     | 44  | 4  | 133  | 0.689 | 2.20E-03 | 0   | 0 | 0 | 0 | 0 | 0 |
| ENSG00000186815 | TPCN1     | chr12:112210351:112210422:+ | 14   | 0  | 91   | 1     | 4   | 1  | 139  | 0.594 | 2.20E-03 | 0   | 0 | 0 | 0 | 0 | 0 |
| ENSG00000128272 | n/a       | chr22:38247305:38247622:+   | 41   | 0  | 2214 | 1     | 122 | 1  | 3814 | 0.945 | 2.20E-03 | 267 | 6 | 0 | 4 | 4 | 0 |
| ENSG00000197448 | GSTK1     | chr7:142671763:142671891:+  | 114  | 0  | 468  | 1     | 38  | 1  | 286  | 0.91  | 2.20E-03 | 0   | 0 | 0 | 0 | 0 | 0 |
| ENSG00000169020 | ATP5I     | chr4:657701:657755:-        | 472  | 4  | 610  | 0.98  | 316 | 10 | 538  | 0.929 | 2.20E-03 | 0   | 0 | 0 | 0 | 0 | 0 |
| ENSG00000073060 | SCARB1    | chr12:123833182:123833310:- | 32   | 10 | 469  | 0.46  | 55  | 0  | 410  | 1     | 2.40E-03 | 0   | 0 | 0 | 0 | 0 | 0 |
| ENSG00000107164 | FUBP3     | chr9:132499875:132499946:+  | 55   | 1  | 344  | 0.953 | 56  | 4  | 651  | 0.837 | 2.40E-03 | 4   | 0 | 0 | 1 | 0 | 0 |
| ENSG00000151445 | C14orf133 | chr14:76993191:76993461:-   | 10   | 11 | 6    | 0.126 | 63  | 7  | 18   | 0.589 | 2.50E-03 | 0   | 0 | 0 | 0 | 0 | 0 |
| ENSG00000117114 | KIAA0786  | chr1:82191259:82191297:+    | 0    | 10 | 128  | 0     | 13  | 4  | 212  | 0.603 | 2.50E-03 | 0   | 0 | 0 | 0 | 0 | 0 |

<sup>a</sup>Displayed are exons whose PSI values change by at least 0.05 and are significantly differentially expressed according to the Fisher's Exact Test (FDR<5%)

<sup>b</sup>PSI: 'percent spliced in' (PSI or  $\Psi$ ): the fraction of mRNAs that include a given exon as a proportion of mRNAs that either included or exclude the exon, based on analysis of mRNA-Seq read density

<sup>c</sup>P value: Fisher's Exact Test

**Supplementary Table 5.** Protein domains<sup>a</sup> overlapping human exons<sup>b</sup> with G-runs ( $\geq 6$  G's) in the downstream intron that are constitutively spliced in human but alternatively skipped in mouse

| <b>Ensembl Exon ID</b> | <b>Gene Name</b> | <b>Domain Name</b>   | <b>Domain ID</b> | <b>Domain Definition</b>                                     |
|------------------------|------------------|----------------------|------------------|--------------------------------------------------------------|
| ENSE00001276536        | SLC2A4           | transmembrane_domain |                  |                                                              |
| ENSE00001322387        | AIRE             | PHD                  | SM00249          | PHD zinc finger                                              |
| ENSE00000776613        | CASR             | Pfam:ANF_receptor    | PF01094          | Receptor family ligand binding region                        |
| ENSE00001095037        | SLC18A2          | transmembrane_domain |                  |                                                              |
| ENSE00000900964        | SLC22A2          | transmembrane_domain |                  |                                                              |
| ENSE00000901278        | NR2C2            | ZnF_C4               | SM00399          | c4 zinc finger in nuclear hormone receptors                  |
| ENSE00001062271        | NOXO1            | SH3                  | SM00326          | Src homology 3 domains                                       |
| ENSE00000858358        | PLXNA1           | PSI                  | SM00423          | domain found in Plexins, Semaphorins and Integrins           |
| ENSE00000725328        | SLC22A8          | transmembrane_domain |                  |                                                              |
| ENSE00001184800        | SLCO2A1          | transmembrane_domain |                  |                                                              |
| ENSE00001160576        | RAD51L3          | Pfam:HhH-GPD         | PF00730          | HhH-GPD superfamily base excision DNA repair protein         |
| ENSE00000860409        | JARID1C          | Pfam:PLU-1           | PF08429          | PLU-1-like protein                                           |
| ENSE00000904839        | ARHGEF11         | PDZ                  | SM00228          | Domain present in PSD-95, Dlg, and ZO-1/2.                   |
| ENSE00000925052        | MYST2            | Pfam:MOZ_SAS         | PF01853          | MOZ/SAS family                                               |
| ENSE00000969365        | LNX1             | PDZ                  | SM00228          | Domain present in PSD-95, Dlg, and ZO-1/2.                   |
| ENSE00000928809        | KIAA0319         | FN3                  | SM00060          | Fibronectin type 3 domain                                    |
| ENSE00000772412        | IL1R2            | IG                   | SM00409          | Immunoglobulin                                               |
| ENSE00001328854        | TRIM37           | RING                 | SM00184          | Ring finger                                                  |
| ENSE00001078588        | SLC6A20          | transmembrane_domain |                  |                                                              |
| ENSE00001147940        | CHRNB1           | Pfam:Neur_chan_LBD   | PF02931          | Neurotransmitter-gated ion-channel ligand binding domain     |
| ENSE00001054369        | LIMD1            | LIM                  | SM00132          | Zinc-binding domain present in Lin-11, Isl-1, Mec-3.         |
| ENSE00001027250        | PRG3             | CLECT                | SM00034          | C-type lectin (CTL) or carbohydrate-recognition domain (CRD) |
| ENSE00000902126        | SLC2A9           | transmembrane_domain |                  |                                                              |
| ENSE00001144910        | IL1F5            | Pfam:IL1             | PF00340          | Interleukin-1 / 18                                           |
| ENSE00000719866        | SLC13A1          | transmembrane_domain |                  |                                                              |
| ENSE00000898574        | SLC4A9           | Pfam:HCO3_cotransp   | PF00955          | HCO3- transporter family                                     |
| ENSE00000898574        | SLC4A9           | transmembrane_domain |                  |                                                              |
| ENSE00001468480        | RSC1A1           | Pfam:Asp_protease    | PF09668          | Aspartyl protease                                            |
| ENSE00001468480        | RSC1A1           | Pfam:RVP             | PF00077          | Retroviral aspartyl protease                                 |
| ENSE00000682715        | MAST1            | S_TK_X               | SM00133          | Extension to Ser/Thr-type protein kinases                    |
| ENSE00000682715        | MAST1            | Pfam:Pkinase_C       | PF00433          | Protein kinase C terminal domain                             |
| ENSE00000904964        | IGSF9            | FN3                  | SM00060          | Fibronectin type 3 domain                                    |
| ENSE00000653067        | PLA2G3           | Pfam:Phospholip_A2_2 | PF05826          | Phospholipase A2                                             |



|                 |                |                      |         |                                                                       |
|-----------------|----------------|----------------------|---------|-----------------------------------------------------------------------|
| ENSE00001085998 | BMPER          | Pfam:VWD             | PF00094 | von Willebrand factor type D domain                                   |
| ENSE00001078343 | SLC4A1AP       | DSRM                 | SM00358 | Double-stranded RNA binding motif                                     |
| ENSE00000925173 | MTMR4          | PTPc_DSPc            | SM00012 | Protein tyrosine phosphatase, catalytic domain, undefined specificity |
| ENSE00001319813 | DSCAML1        | FN3                  | SM00060 | Fibronectin type 3 domain                                             |
| ENSE00001227480 | SLC6A18        | transmembrane_domain |         |                                                                       |
| ENSE00001243192 | SMC1A          | coiled_coil_region   |         |                                                                       |
| ENSE00000730179 | GLE1L          | coiled_coil_region   |         |                                                                       |
| ENSE00001097895 | GYLTL1B        | Pfam:Glyco_transf_8  | PF01501 | Glycosyl transferase family 8                                         |
| ENSE00001317121 | CHD6           | Pfam:BRK             | PF07533 | BRK domain                                                            |
| ENSE00000710810 | CADM4          | Pfam:C2-set_2        | PF08205 | CD80-like C2-set immunoglobulin domain                                |
| ENSE00000710810 | CADM4          | IG                   | SM00409 | Immunoglobulin                                                        |
| ENSE00001260528 | SYCE2          | coiled_coil_region   |         |                                                                       |
| ENSE00001176633 | MYEF2          | RRM                  | SM00360 | RNA recognition motif                                                 |
| ENSE00000770211 | RRP9           | WD40                 | SM00320 | WD40 repeats                                                          |
| ENSE00000947730 | RHBDL3         | transmembrane_domain |         |                                                                       |
| ENSE00001108386 | C21orf63       | Pfam:Gal_Lectin      | PF02140 | Galactose binding lectin domain                                       |
| ENSE00001056243 | FCHO1          | Pfam:SAFF            | PF10291 | SAFF domain                                                           |
| ENSE00000894651 | NCAN           | IG                   | SM00409 | Immunoglobulin                                                        |
| ENSE00000894651 | NCAN           | LINK                 | SM00445 | Link (Hyaluronan-binding)                                             |
| ENSE00000725428 | TRIM24         | BBOX                 | SM00336 | B-Box-type zinc finger                                                |
| ENSE00000815783 | SLC10A7        | transmembrane_domain |         |                                                                       |
| ENSE00001379933 | MS4A10         | transmembrane_domain |         |                                                                       |
| ENSE00001379933 | MS4A10         | Pfam:CD20            | PF04103 | CD20/IgE Fc receptor beta subunit family                              |
| ENSE00001310615 | DDX51          | HELICc               | SM00490 | helicase superfamily c-terminal domain                                |
| ENSE00000349542 | TMEM16H        | transmembrane_domain |         |                                                                       |
| ENSE00001463691 | TXNDC8         | Pfam:Thioredoxin     | PF00085 | Thioredoxin                                                           |
| ENSE00001417683 | SPNS3          | transmembrane_domain |         |                                                                       |
| ENSE00001302237 | MBOAT1         | transmembrane_domain |         |                                                                       |
| ENSE00001302237 | MBOAT1         | Pfam:MBOAT           | PF03062 | MBOAT family                                                          |
| ENSE00001119065 | VPS37C         | coiled_coil_region   |         |                                                                       |
| ENSE00001090368 | SRCRB4D        | SR                   | SM00202 | Scavenger receptor Cys-rich                                           |
| ENSE00001175399 | DCST1          | transmembrane_domain |         |                                                                       |
| ENSE00001310371 | SLC43A2        | transmembrane_domain |         |                                                                       |
| ENSE00001310371 | SLC43A2        | Pfam:MFS_1           | PF07690 | Major Facilitator Superfamily                                         |
| ENSE00000960585 | ATP8B2         | transmembrane_domain |         |                                                                       |
| ENSE00001119112 | VWCE           | VWC                  | SM00214 | von Willebrand factor (vWF) type C domain                             |
| ENSE00001465528 | NP_001013765.1 | transmembrane_domain |         |                                                                       |
| ENSE00000575433 | PPCDC          | Pfam:Flavoprotein    | PF02441 | Flavoprotein                                                          |

|                 |                |                      |         |                                                                   |
|-----------------|----------------|----------------------|---------|-------------------------------------------------------------------|
| ENSE00001208051 | AIM1L          | XTALbg               | SM00247 | Beta/gamma crystallins                                            |
| ENSE00001175371 | NP_116231.2    | Pfam:CytochromB561_N | PF09786 | Cytochrome B561, N terminal                                       |
| ENSE00001175371 | NP_116231.2    | transmembrane_domain |         |                                                                   |
| ENSE00000667398 | FAM86A         | Pfam:Methyltransf_16 | PF10294 | Putative methyltransferase                                        |
| ENSE00000927140 | GARNL3         | Pfam:Rap_GAP         | PF02145 | Rap/ran-GAP                                                       |
| ENSE00001171153 | MYT1_HUMAN     | Pfam:zf-C2HC         | PF01530 | Zinc finger, C2HC type                                            |
| ENSE00001363796 | RPTOR_HUMAN    | WD40                 | SM00320 | WD40 repeats                                                      |
| ENSE00001272781 | TRSPAP1        | RRM                  | SM00360 | RNA recognition motif                                             |
| ENSE00001067177 | FNDC7          | FN3                  | SM00060 | Fibronectin type 3 domain                                         |
| ENSE00001280805 | SLC39A11       | Pfam:Zip             | PF02535 | ZIP Zinc transporter                                              |
| ENSE00001280805 | SLC39A11       | transmembrane_domain |         |                                                                   |
| ENSE00001239305 | ASAH3L         | transmembrane_domain |         |                                                                   |
| ENSE00001476044 | ZNF783         | KRAB                 | SM00349 | krueppel associated box                                           |
| ENSE00001365697 | NP_001010866.1 | transmembrane_domain |         |                                                                   |
| ENSE00001260286 | ZNF545         | KRAB                 | SM00349 | krueppel associated box                                           |
| ENSE00000798452 | LRRC40         | LRR                  | SM00370 | Leucine-rich repeats, outliers                                    |
| ENSE00000798452 | LRRC40         | LRR_TYP              | SM00369 | Leucine-rich repeats, typical (most populated) subfamily          |
| ENSE00001302858 | SLC35F3        | transmembrane_domain |         |                                                                   |
| ENSE00001035708 | SLC5A6         | transmembrane_domain |         |                                                                   |
| ENSE00000655119 | C20orf54       | transmembrane_domain |         |                                                                   |
| ENSE00000655119 | C20orf54       | Pfam:DUF1011         | PF06237 | Protein of unknown function (DUF1011)                             |
| ENSE00000807601 | ZCCHC9         | Pfam:zf-CCHC         | PF00098 | Zinc knuckle                                                      |
| ENSE00000807601 | ZCCHC9         | ZnF_C2HC             | SM00343 | zinc finger                                                       |
| ENSE00001260327 | ZNF545         | KRAB                 | SM00349 | krueppel associated box                                           |
| ENSE00001260327 | ZNF545         | transmembrane_domain |         |                                                                   |
| ENSE00001450929 | FAM40A         | Pfam:N1221           | PF07923 | N1221-like protein                                                |
| ENSE00000829291 | NP_112203.1    | RRM                  | SM00360 | RNA recognition motif                                             |
| ENSE00001230281 | NP_612637.1    | transmembrane_domain |         |                                                                   |
| ENSE00000683831 | ARHGEF15       | RhoGEF               | SM00325 | Guanine nucleotide exchange factor for Rho/Rac/Cdc42-like GTPases |
| ENSE00001100288 | PAQR5          | Pfam:HlyIII          | PF03006 | Haemolysin-III related                                            |
| ENSE00001100288 | PAQR5          | transmembrane_domain |         |                                                                   |
| ENSE00001113510 | KLHL26         | BTB                  | SM00225 | Broad-Complex, Tramtrack and Bric a brac                          |

<sup>a</sup>Protein domains as annotated in SMART or Pfam

<sup>b</sup>Exons that do not overlap protein domains annotated in SMART or Pfam are not listed.

**Supplementary Table 6.** GO categories enriched in group 1: genes with 9 or more G's in G-runs within +11 to +70 nt from 5'ss in at least 50% of introns, or group 2: genes containing mRNA-SEQ and array-predicted candidate hnRNP H-activated exons

| GO id   | P values <sup>a</sup> in group 1 | P values <sup>b</sup> in group 2 | GO description                                   | GO id          | P values <sup>a</sup> in group 1 | P values <sup>b</sup> in group 2 | GO description                             |
|---------|----------------------------------|----------------------------------|--------------------------------------------------|----------------|----------------------------------|----------------------------------|--------------------------------------------|
| 0004252 | <b>1.90E-07</b>                  | NS <sup>c</sup>                  | serine-type endopeptidase activity               | 0006816        | 5.18E-04                         | NS                               | calcium ion transport                      |
| 0005576 | <b>3.44E-07</b>                  | NS                               | extracellular region                             | <b>0032502</b> | 5.36E-04                         | <b>4.00E-04</b>                  | <b>developmental process</b>               |
| 0032501 | <b>3.98E-07</b>                  | <b>1.00E-04</b>                  | <b>multicellular organismal process</b>          | 0006066        | 5.84E-04                         | NS                               | alcohol metabolic process                  |
| 0005509 | <b>5.11E-07</b>                  | NS                               | <b>calcium ion binding</b>                       | 0005891        | 6.01E-04                         | NS                               | voltage-gated calcium channel              |
| 0017171 | <b>1.05E-06</b>                  | NS                               | <b>serine hydrolase activity</b>                 | 0005272        | 6.08E-04                         | NS                               | sodium channel activity                    |
| 0008236 | <b>1.05E-06</b>                  | NS                               | <b>serine-type peptidase activity</b>            | 0005887        | 6.78E-04                         | NS                               | integral to plasma membrane                |
| 0005886 | <b>3.19E-06</b>                  | <b>1.00E-04</b>                  | <b>plasma membrane</b>                           | 0004175        | 7.76E-04                         | NS                               | endopeptidase activity                     |
| 0048856 | <b>8.72E-06</b>                  | NS                               | <b>anatomical structure development</b>          | <b>0044425</b> | 8.96E-04                         | <b>1.00E-04</b>                  | <b>membrane part</b>                       |
| 0007275 | <b>9.61E-06</b>                  | NS                               | <b>multicellular organismal development</b>      | 0005625        | 9.23E-04                         | NS                               | soluble fraction                           |
| 0016020 | <b>1.05E-05</b>                  | <b>1.00E-04</b>                  | <b>membrane</b>                                  | 0003924        | 9.28E-04                         | NS                               | GTPase activity                            |
| 0044459 | <b>1.41E-05</b>                  | <b>1.00E-04</b>                  | <b>plasma membrane part</b>                      | 0007267        | 9.66E-04                         | NS                               | cell-cell signaling                        |
| 0051179 | <b>1.62E-05</b>                  | NS                               | <b>localization</b>                              | 0009581        | 9.71E-04                         | NS                               | detection of external stimulus             |
| 0048731 | <b>1.71E-05</b>                  | 8.00E-04                         | <b>system development</b>                        | <b>0008092</b> | NS                               | <b>1.00E-04</b>                  | <b>cytoskeletal protein binding</b>        |
| 0007154 | <b>3.34E-05</b>                  | <b>1.00E-04</b>                  | <b>cell communication</b>                        | <b>0060089</b> | NS                               | <b>1.00E-04</b>                  | <b>molecular transducer activity</b>       |
| 0007264 | <b>3.63E-05</b>                  | NS                               | <b>small GTPase mediated signal transduction</b> | <b>0007166</b> | NS                               | <b>1.00E-04</b>                  | <b>cell surface receptor linked signal</b> |
| 0005179 | <b>8.82E-05</b>                  | NS                               | <b>hormone activity</b>                          | <b>0009966</b> | NS                               | <b>1.00E-04</b>                  | <b>regulation of signal transduction</b>   |
| 0006810 | <b>9.06E-05</b>                  | NS                               | <b>transport</b>                                 | <b>0046872</b> | NS                               | <b>1.00E-04</b>                  | <b>metal ion binding</b>                   |
| 0007265 | <b>9.57E-05</b>                  | NS                               | <b>Ras protein signal transduction</b>           | <b>0005488</b> | NS                               | <b>1.00E-04</b>                  | <b>binding</b>                             |
| 0005102 | <b>1.28E-04</b>                  | NS                               | <b>receptor binding</b>                          | <b>0004871</b> | NS                               | <b>1.00E-04</b>                  | <b>signal transducer activity</b>          |
| 0005215 | <b>1.62E-04</b>                  | NS                               | <b>transporter activity</b>                      | <b>0043169</b> | NS                               | <b>1.00E-04</b>                  | <b>cation binding</b>                      |
| 0051234 | <b>1.66E-04</b>                  | NS                               | <b>establishment of localization</b>             | <b>0043167</b> | NS                               | <b>1.00E-04</b>                  | <b>ion binding</b>                         |
| 0031224 | <b>2.00E-04</b>                  | <b>1.00E-04</b>                  | <b>intrinsic to membrane</b>                     | <b>0005509</b> | NS                               | <b>1.00E-04</b>                  | <b>calcium ion binding</b>                 |
| 0030182 | 2.68E-04                         | NS                               | neuron differentiation                           | <b>0004872</b> | NS                               | <b>2.00E-04</b>                  | <b>receptor activity</b>                   |
| 0016021 | 2.70E-04                         | <b>1.00E-04</b>                  | <b>integral to membrane</b>                      | <b>0046914</b> | NS                               | <b>2.00E-04</b>                  | <b>transition metal ion binding</b>        |
| 0007242 | 3.06E-04                         | <b>1.00E-04</b>                  | <b>intracellular signaling cascade</b>           | <b>0006629</b> | NS                               | <b>2.00E-04</b>                  | <b>lipid metabolic process</b>             |
| 0007399 | 3.33E-04                         | NS                               | nervous system development                       | <b>0030695</b> | NS                               | <b>2.00E-04</b>                  | <b>GTPase regulator activity</b>           |
| 0007165 | 3.61E-04                         | <b>1.00E-04</b>                  | <b>signal transduction</b>                       | <b>0008270</b> | NS                               | <b>2.00E-04</b>                  | <b>zinc ion binding</b>                    |
| 0048699 | 4.19E-04                         | NS                               | generation of neurons                            | <b>0030234</b> | NS                               | <b>4.00E-04</b>                  | <b>enzyme regulator activity</b>           |
| 0015674 | 4.23E-04                         | NS                               | di-, tri-valent inorganic cation transport       | <b>0016491</b> | NS                               | <b>4.00E-04</b>                  | <b>oxidoreductase activity</b>             |
| 0031226 | 4.75E-04                         | NS                               | intrinsic to plasma membrane                     | 0005856        | NS                               | 8.00E-04                         | cytoskeleton                               |
| 0022008 | 5.10E-04                         | NS                               | neurogenesis                                     |                |                                  |                                  |                                            |

<sup>a</sup>P values below Bonferroni cutoff of 2.1E-04 are shown in bold.

<sup>b</sup>P-values below Bonferroni cutoff of 5.2E-04 are shown in bold.

<sup>c</sup>NS: not significant

**Supplementary Table 7.** Motifs with significantly different conservation levels in the downstream intronic regions of ACEs and ICEs with different 5'ss strength

| Exons:<br>intron L | ACEs  |       |        | ACEs  |       |        | ICEs  |       |       |       |        | ICEs    |       |       |       |       |        |         |
|--------------------|-------|-------|--------|-------|-------|--------|-------|-------|-------|-------|--------|---------|-------|-------|-------|-------|--------|---------|
|                    | 70    |       |        | 200   |       |        | 70    |       |       |       |        | 200     |       |       |       |       |        |         |
| 5'ss (bits)        | [0,4] | [4,8] | [8,12] | [0,4] | [4,8] | [8,12] | [0,2] | [2,4] | [4,6] | [6,8] | [8,10] | [10,12] | [0,2] | [2,4] | [4,6] | [6,8] | [8,10] | [10,12] |
| AAAU               |       |       |        |       |       |        |       |       | *     |       |        |         |       |       |       |       |        |         |
| AAAC               |       |       |        |       |       |        |       | *     |       |       |        |         |       |       |       |       |        |         |
| AAGC               |       |       |        |       |       |        |       |       | *     |       |        |         |       |       | *     |       |        |         |
| AAUC               |       |       |        |       |       |        |       |       | *     |       |        |         |       | *     |       |       |        |         |
| ACAG               |       |       |        |       |       |        |       | *     |       |       |        |         |       |       |       |       |        |         |
| ACCG               |       | *     |        |       |       |        |       |       |       |       |        |         |       |       |       |       |        |         |
| ACGC               |       |       |        |       |       |        |       | *     |       |       |        |         |       |       |       |       |        |         |
| AGAA               |       |       |        |       |       |        | +     |       | *     |       |        |         |       |       |       |       |        |         |
| AGAG               |       |       |        |       |       |        |       |       |       |       |        |         |       |       | *     |       |        |         |
| AGCA               |       |       |        |       |       |        |       |       | *     | +     |        |         |       |       |       |       |        |         |
| AGCC               |       |       |        |       |       |        | *     |       |       | +     | +      |         |       |       |       |       |        |         |
| AGCU               |       |       |        |       |       |        |       | *     | *     |       |        |         |       |       |       | *     |        |         |
| AUCG               |       | *     | *      |       |       |        |       |       |       |       |        |         |       |       |       |       |        |         |
| AUGC               |       |       |        |       | *     |        |       |       |       |       |        |         |       |       |       |       |        |         |
| AUUC               | *     |       |        |       |       |        |       |       |       |       |        |         | *     |       |       |       |        |         |
| CAAA               |       |       |        |       |       |        | *     |       |       |       |        |         |       |       |       |       |        |         |
| CACA               | *     |       |        |       |       |        |       |       |       |       |        |         |       |       |       |       |        |         |
| CACG               |       | *     |        |       |       |        |       | *     |       |       |        |         |       |       |       |       |        |         |
| CAGC               |       |       |        |       |       |        | *     |       |       |       |        |         |       |       |       |       |        |         |
| CAGG               | *     |       |        |       |       |        |       |       |       |       |        |         |       |       |       |       |        |         |
| CCCC               |       |       |        |       |       |        |       |       | *     |       |        |         |       |       |       |       |        |         |
| CCGA               |       |       |        |       |       |        |       | *     |       |       |        |         |       |       |       |       |        |         |
| CCGU               | *     |       |        |       |       |        |       |       |       |       |        |         |       |       |       |       |        |         |
| CCUA               |       |       |        |       |       |        | *     |       |       |       |        |         |       |       |       |       |        |         |
| CCUG               |       |       |        |       |       |        |       |       |       |       |        | *       |       |       |       |       |        |         |
| CGCU               |       | *     |        |       |       |        |       |       |       |       |        |         |       |       |       |       |        |         |
| CGGG               |       |       |        | *     |       |        |       |       |       |       |        |         |       |       |       |       |        |         |
| CUAA               | *     | +     | +      |       |       |        |       |       |       |       |        | *       |       |       | *     |       |        | *       |
| GAAC               |       |       |        |       |       |        |       |       |       |       |        |         |       |       |       |       |        | *       |
| GAAG               |       |       |        | *     |       |        |       |       |       |       |        |         |       |       |       |       |        |         |
| GACA               |       |       |        | *     |       |        |       |       |       |       |        |         |       |       |       |       |        |         |
| GACC               |       |       |        |       |       |        |       |       | *     |       | +      | +       |       |       | *     | *     | *      | *       |
| GACG               |       |       |        |       |       |        |       |       |       |       |        |         | *     |       |       |       |        |         |
| GAGG               |       |       |        |       |       |        | *     |       |       |       |        |         |       |       |       |       |        |         |
| GAUC               |       |       |        | *     |       |        |       |       |       |       |        |         |       |       |       |       |        |         |
| GCAU               |       |       |        | +     | *     | +      |       |       |       |       |        |         |       |       |       |       |        |         |
| GCCA               |       |       |        |       |       |        |       |       |       |       | *      |         |       |       |       |       |        |         |
| GCCC               |       |       |        |       |       |        |       |       |       |       | *      | *       |       |       |       |       |        |         |
| GCGA               |       |       |        |       |       |        |       |       |       |       |        | *       |       |       |       |       |        |         |
| GCUG               |       |       |        | *     | +     |        |       |       |       |       |        |         |       |       |       |       |        |         |
| GGCC               |       |       |        |       |       |        |       |       |       |       |        | *       |       |       |       |       |        |         |
| GGGC               |       |       |        |       |       |        | +     | +     | +     | +     | *      | +       |       |       |       |       |        |         |
| GGGG               |       |       |        |       |       |        |       | +     | +     | *     | +      | +       |       |       |       |       |        |         |
| GUAG               |       |       |        |       |       |        |       | *     |       |       |        |         |       |       |       |       |        |         |
| GUCA               |       |       |        |       |       |        | *     |       | *     | *     | +      |         |       |       |       |       |        |         |
| GUCG               |       |       |        |       |       |        |       |       | *     |       |        |         |       |       |       |       |        |         |
| GUUA               |       |       |        |       |       |        |       |       |       |       |        |         |       |       | *     |       |        | +       |
| UAAA               |       |       |        |       |       |        |       |       |       |       | *      | *       |       |       | *     |       |        |         |
| UAAC               |       |       |        |       |       |        |       | *     |       |       | +      |         |       |       |       |       |        |         |
| UAGA               |       |       |        |       |       |        |       | *     | +     | *     |        | +       |       |       |       |       |        |         |
| UAGC               |       |       |        |       |       |        |       | *     |       |       |        |         |       |       |       |       |        |         |
| UAGG               |       |       |        | *     |       |        |       |       |       |       |        |         |       |       |       |       |        |         |
| UCAA               |       |       |        |       |       |        | *     |       |       |       |        |         |       |       |       |       |        |         |
| UCCG               |       |       |        | *     |       |        |       |       |       |       |        |         |       |       |       |       |        |         |
| UGAA               |       |       |        |       |       |        |       |       | *     |       |        |         |       |       |       |       |        |         |
| UGAC               |       |       |        |       |       |        |       |       | *     |       | +      | +       |       |       | *     | +     | +      | +       |
| UGGG               |       |       |        |       |       |        |       | +     | +     | *     | +      | +       |       |       |       |       |        |         |

|       |   |   |   |   |   |  |   |   |   |   |   |   |   |   |   |   |   |   |   |
|-------|---|---|---|---|---|--|---|---|---|---|---|---|---|---|---|---|---|---|---|
| UGUC  |   |   |   |   |   |  |   | * | * |   |   |   |   |   |   |   |   |   |   |
| UUGC  |   |   |   |   |   |  |   |   |   |   |   |   |   | * |   |   |   |   |   |
| UUUU  |   |   |   |   |   |  | * |   |   |   |   |   |   |   |   |   |   |   |   |
| AAACA |   |   |   |   |   |  |   |   |   |   |   |   | * |   |   |   |   |   |   |
| AAACC |   |   |   |   |   |  |   | * |   | * |   |   |   |   |   |   |   |   |   |
| AAAGC |   |   |   |   |   |  |   |   | * |   |   |   |   |   |   |   |   |   |   |
| AAAUA |   |   |   |   |   |  |   |   | * |   |   |   | + |   |   |   |   |   |   |
| AACCC |   | * |   |   |   |  |   |   |   |   |   |   |   |   |   |   |   |   |   |
| ACAAC |   |   | * |   |   |  |   |   |   |   |   |   |   |   |   |   |   |   |   |
| ACACA |   |   |   |   |   |  |   |   |   |   |   |   |   |   |   | + | * | * | + |
| ACACU |   |   |   |   |   |  |   | * |   |   |   |   |   |   |   |   |   |   |   |
| ACAUA |   |   |   | * |   |  |   |   |   |   |   |   |   |   |   |   |   |   |   |
| ACCAC |   |   |   |   |   |  |   |   | * |   |   |   |   |   |   |   |   |   |   |
| ACCCA |   |   |   |   |   |  |   |   |   |   |   | * |   |   |   |   |   |   |   |
| ACCGU |   |   |   |   |   |  |   |   |   |   |   |   |   | * |   |   |   |   |   |
| ACGAC |   |   |   |   |   |  |   |   | * |   |   |   |   |   |   |   |   |   |   |
| ACGCU |   | * |   |   |   |  |   |   |   | * |   |   |   |   |   |   |   |   |   |
| ACGGA |   |   |   |   | * |  |   |   |   |   |   |   |   |   |   |   |   |   |   |
| ACUGU |   |   |   | * |   |  |   |   |   |   |   |   |   |   |   |   |   |   |   |
| AGAGA |   |   |   |   |   |  |   |   | * |   |   |   |   |   |   |   |   |   |   |
| AGAGC |   |   |   |   | * |  |   |   |   |   |   |   |   |   |   |   |   |   |   |
| AGCGC |   |   |   |   |   |  |   |   |   |   | * |   |   |   |   |   |   | * |   |
| AGCUU | * |   |   |   |   |  |   |   |   | * |   |   |   |   |   |   |   |   |   |
| AGUAA |   |   |   |   |   |  |   |   |   |   |   |   |   |   | * |   |   | + |   |
| AGUAG |   |   |   |   | * |  |   |   |   |   |   |   |   |   |   |   |   |   |   |
| AUCAG |   |   |   |   |   |  |   | * |   |   |   |   |   |   |   |   |   |   |   |
| AUCCG |   |   |   | * |   |  |   |   |   |   |   |   | * |   |   |   |   |   |   |
| AUCGU |   | * |   |   |   |  |   |   |   |   |   |   |   |   |   |   |   |   |   |
| AUGUU |   |   |   |   |   |  |   |   |   |   |   |   | * |   |   |   |   |   |   |
| AUJCC | * |   |   | * |   |  |   |   |   |   |   |   |   |   |   |   |   |   |   |
| CACAC |   |   |   |   |   |  |   |   |   |   |   |   |   |   |   |   | * | * |   |
| CACAU |   |   |   |   |   |  |   |   |   |   |   |   |   | * |   |   |   |   |   |
| CACCG |   | * |   |   |   |  |   |   |   |   |   |   |   |   |   |   |   |   |   |
| CACGC |   |   |   |   |   |  |   | * |   |   |   |   |   |   | * |   |   |   |   |
| CAGCC |   |   |   |   |   |  | + |   |   | * |   | + |   |   |   |   |   |   |   |
| CAGGA |   |   |   |   |   |  |   |   |   |   | * |   |   |   |   |   |   |   |   |
| CAUCG |   | * |   |   |   |  |   |   |   |   |   |   |   |   |   |   |   |   |   |
| CAUGU |   |   |   |   | * |  |   |   | * |   |   |   |   | * |   |   |   |   |   |
| CCAGA |   |   |   |   |   |  |   |   | * | * |   |   |   |   |   |   |   |   |   |
| CCAGC |   |   |   |   |   |  |   |   |   |   |   |   |   |   | * |   |   |   |   |
| CCCAG |   |   |   |   |   |  |   |   |   |   |   | * |   |   |   |   |   |   |   |
| CCCCG |   |   |   |   |   |  |   |   |   | * |   |   |   |   |   |   |   |   |   |
| CCGAA |   |   |   |   |   |  |   |   |   |   |   |   | * |   |   |   |   |   |   |
| CCGAG |   |   |   |   |   |  |   | * |   |   |   |   |   |   | * |   |   |   |   |
| CCGGC |   |   | * | * |   |  |   |   |   |   |   |   |   |   |   |   |   |   |   |
| CCUUU | * |   |   |   |   |  |   |   |   |   |   |   |   |   |   |   |   |   |   |
| CGAGC |   |   |   |   |   |  |   |   |   |   |   |   |   |   |   | * |   |   |   |
| CGAGG |   |   |   |   |   |  |   |   |   |   |   |   |   |   | * |   |   |   |   |
| CGCAU |   |   |   |   |   |  |   |   |   |   |   |   | * |   |   |   |   |   |   |
| CGCCU |   |   |   |   |   |  |   | * |   |   |   |   |   |   | * |   |   |   |   |
| CGCUA |   |   |   |   |   |  |   |   |   |   |   |   |   |   |   | * |   |   |   |
| CGCUG |   |   |   |   |   |  |   |   |   |   |   |   | * |   |   |   |   |   |   |
| CGCUU |   |   |   | * | + |  |   |   |   |   |   |   |   |   |   |   |   |   |   |
| CGGAG |   |   |   |   |   |  |   |   | * |   |   |   |   |   |   |   |   |   |   |
| CGGUU |   |   |   |   |   |  |   |   |   |   |   |   |   |   |   |   | * |   |   |
| CGUCU |   |   | * |   |   |  |   |   |   |   |   |   |   |   |   |   |   |   |   |
| CUAUU |   |   |   | * |   |  |   |   |   |   |   |   |   |   |   |   |   |   |   |
| CUGAC |   |   |   |   |   |  |   |   |   | * |   |   |   |   |   | * | * | * |   |
| CUGCU |   |   | * |   |   |  |   |   | * |   |   |   |   |   | * | + |   | + |   |
| CUGUG |   |   |   |   |   |  |   |   |   |   |   | * |   |   |   |   |   |   |   |
| CUUUC |   |   |   |   |   |  |   |   |   |   |   |   |   | * |   |   |   |   |   |
| GAAGA |   |   |   | * |   |  |   |   |   |   |   |   |   |   |   |   |   |   |   |
| GAAUG |   |   |   |   |   |  |   |   |   |   |   |   |   |   |   | * |   |   |   |

|       |   |   |   |   |   |   |   |   |   |   |   |   |   |   |  |   |   |   |   |   |   |   |
|-------|---|---|---|---|---|---|---|---|---|---|---|---|---|---|--|---|---|---|---|---|---|---|
| GAAUU |   |   |   |   |   |   |   |   |   |   |   |   |   |   |  |   |   |   | * |   |   |   |
| GACAC |   |   |   | * |   |   |   |   |   |   |   |   |   |   |  |   |   |   |   |   |   |   |
| GAGCA |   | * |   |   |   |   |   |   |   |   |   |   |   |   |  |   |   |   |   |   |   |   |
| GAGUU |   |   |   |   |   |   |   | * |   |   |   |   |   |   |  |   |   |   |   |   |   |   |
| GCACG |   | * |   |   |   |   |   |   |   |   |   |   |   |   |  |   |   |   |   |   |   |   |
| GCAGA |   |   |   |   |   |   |   |   | * |   |   |   |   |   |  |   |   |   |   |   |   |   |
| GCCCA |   | * |   |   |   |   |   |   |   |   |   |   |   |   |  |   |   |   |   |   |   |   |
| GCGAC |   |   |   |   |   |   |   |   |   |   |   |   |   |   |  |   |   |   | * |   |   |   |
| GCGCU |   |   |   |   |   |   |   |   |   |   |   |   |   |   |  |   |   |   | * |   |   |   |
| GCUGG |   |   | * |   |   |   |   |   |   |   |   |   |   |   |  |   |   |   |   |   |   |   |
| GCUUC |   |   |   |   |   |   |   |   |   |   |   |   |   |   |  |   |   |   |   | * |   |   |
| GCUUU |   |   |   |   |   | * |   |   |   |   |   |   |   |   |  |   |   |   |   |   |   |   |
| GGACC |   |   |   | * |   |   |   |   |   |   |   |   |   |   |  |   |   |   |   |   |   |   |
| GGCAG |   |   |   |   |   |   | * |   |   |   |   |   |   |   |  |   |   |   |   |   |   |   |
| GGCCC |   |   |   |   |   |   |   |   |   |   |   |   |   |   |  |   | * | + |   | + | + |   |
| GGCGA |   |   |   |   |   |   |   |   |   |   |   |   |   |   |  | * |   |   |   |   |   |   |
| GGUAA |   |   |   | * |   |   | + |   |   |   |   |   |   |   |  |   |   |   |   |   |   |   |
| GGUGU |   |   |   |   |   |   |   |   | * |   |   |   |   |   |  |   |   |   |   |   |   |   |
| GGUUU |   |   |   | * |   |   |   |   |   |   |   |   |   |   |  |   |   |   |   |   |   |   |
| GUAGA |   |   |   |   |   |   |   |   |   |   |   |   |   |   |  |   |   |   |   | * |   |   |
| GUCAC |   |   |   |   |   |   |   |   |   |   |   |   |   |   |  |   |   |   | * | + | + |   |
| GUCAG |   |   |   |   |   |   |   |   |   |   |   |   |   |   |  | + | + |   | * |   | + |   |
| GUGAA | * |   |   |   |   |   |   |   |   |   |   |   |   |   |  |   |   |   |   |   |   |   |
| GUGAC |   |   |   |   |   |   |   |   | * | + |   | + |   |   |  |   |   |   |   |   |   |   |
| GUGGU |   |   |   |   |   |   |   |   |   | + | * |   |   |   |  |   |   |   |   |   |   |   |
| GUGUA |   |   |   |   |   |   |   |   | * |   |   |   |   |   |  |   |   |   |   |   |   |   |
| GUGUG |   | * |   |   |   |   |   |   | + | + | * | + | + |   |  |   |   |   |   |   |   |   |
| GUUCG |   |   |   | * |   |   |   |   |   |   |   |   |   |   |  |   |   |   |   |   |   |   |
| UAACC |   | * |   |   | * |   | + |   |   |   |   |   |   |   |  |   |   |   |   |   |   |   |
| UAAGC |   |   |   |   |   |   |   |   |   |   | * |   |   |   |  |   |   |   |   |   |   |   |
| UAAUC |   |   |   |   | * |   |   |   |   |   |   |   |   |   |  |   |   |   |   |   |   |   |
| UAAUG |   |   |   |   |   |   |   |   |   |   |   |   |   |   |  |   |   |   |   | * |   |   |
| UAGAA |   |   |   |   |   |   |   |   | + |   | * |   |   |   |  |   |   |   |   |   |   |   |
| UAGAC |   | * |   |   |   |   |   |   |   |   |   |   |   |   |  |   |   |   |   |   |   |   |
| UAGAG |   |   |   |   |   |   |   | * |   |   |   |   |   |   |  |   |   |   |   |   |   |   |
| UAGGC |   |   |   |   |   |   |   |   |   |   |   |   |   |   |  |   |   |   | * |   |   |   |
| UAUCU |   |   |   |   |   |   |   |   |   |   |   |   |   |   |  |   |   |   | * |   |   |   |
| UAUUU | * |   |   |   |   |   |   |   |   |   |   |   |   |   |  |   |   |   |   |   |   |   |
| UCACA |   |   |   |   |   |   |   |   |   |   |   |   |   |   |  |   |   |   | * | + |   |   |
| UCCCA |   |   |   |   |   |   |   |   |   |   |   |   |   |   |  |   |   |   | * |   |   |   |
| UCGUU |   |   |   |   |   |   |   |   |   | * |   |   |   |   |  |   |   |   |   |   |   |   |
| UCUGC |   |   |   |   |   |   |   |   |   |   |   |   |   |   |  | + |   | + | * |   | + |   |
| UGAAA | * |   |   |   |   |   |   |   |   |   |   |   |   |   |  |   |   |   |   |   |   |   |
| UGACC |   |   |   |   | * |   |   |   |   | * |   | + |   |   |  |   |   |   | * | + | + | + |
| UGACG |   |   |   |   |   |   |   |   |   |   |   |   |   |   |  |   |   |   | * |   |   |   |
| UGAGU |   |   |   |   |   |   |   |   |   |   |   | * |   |   |  |   |   |   |   |   |   |   |
| UGCAU | + | * | + |   |   |   |   |   |   |   |   |   |   |   |  |   |   |   |   |   |   |   |
| UGCCA |   |   |   |   |   |   |   | + |   |   |   | * |   |   |  |   |   |   |   |   |   |   |
| UGCCU |   | * |   |   |   |   |   |   |   |   |   |   |   |   |  |   |   |   |   |   |   |   |
| UGCUC |   |   |   | * | * |   |   |   |   |   |   |   |   |   |  |   |   |   |   |   |   |   |
| UGGUU |   |   |   |   |   |   |   |   |   |   | * |   |   |   |  |   |   |   |   |   |   |   |
| UGUCG |   |   |   |   |   |   |   |   |   | * |   |   |   |   |  |   |   |   |   |   |   |   |
| UUAAU |   |   |   |   |   |   |   |   |   |   |   |   |   |   |  |   | * |   |   |   |   |   |
| UUAGA |   |   |   |   |   |   |   |   |   |   |   |   |   |   |  |   |   |   |   | * |   |   |
| UUCAC |   |   |   |   |   |   |   |   | * |   |   |   |   |   |  |   |   | * |   |   |   |   |
| UUCAU |   |   |   |   |   |   |   |   |   |   |   |   |   | * |  |   |   |   |   |   |   |   |
| UUCCG | * |   |   | * |   |   |   |   |   |   |   |   |   |   |  |   |   |   |   |   |   |   |
| UUGCC |   | * |   |   |   |   |   |   |   |   |   |   |   |   |  |   |   |   |   |   |   |   |
| UUUCA |   |   |   |   |   |   |   |   | * |   |   |   |   |   |  |   |   |   |   |   |   |   |
| UUUUC | * |   |   |   |   |   |   |   |   |   |   |   |   |   |  |   |   |   |   |   |   |   |

\*: more conserved in the corresponding 5'ss group than at least one other group  
+: significantly conserved in the corresponding 5'ss group

## **SUPPLEMENTARY METHODS**

### **Real Time RT-PCR of hnRNP H mRNA**

The amount of hnRNP H mRNA was measured in all samples relative to the housekeeping gene glyceraldehyde-3-phosphate dehydrogenase (*GAPDH*) by real-time RT-PCR using the primers:

hnRNP H forward: 5' GAGGGATTCGTGGTGAAGG 3'

hnRNP H reverse: 5' TCCACCGGCAATGTTATCC 3'

GAPDH forward: 5' TCGTGGAGTCCACTGGCGTCTT 3'

GAPDH reverse: 5' TGGCAGTGATGGCATGGACTG 3'

### **Western analysis**

Total cell protein extract was analyzed by PAGE, transferred to a PVDF membrane and probed with primary antibodies to hnRNP H (polyclonal from rabbit, Bethyl Laboratories) and GAPDH (monoclonal from mouse, Abcam). The secondary antibodies were linked to alkaline phosphatase and visualization was done using ECF substrate (Amersham Biosciences).

### **qRT-PCR validation of hnRNP H-responsive exons**

To validate the splicing changes following H-KD, 22 exons were selected from the set of exons with a change in exon inclusion level ( $\Delta\Psi$ ) of 20% or more (N=136) in the mRNA-SEQ data or with a relative reduction in expression level ( $LFC_{\text{gene}} - LFC_{\text{exon}}$ ) of 0.5 or more (N=205) in the array data (for computational analysis, see below). Test exons were chosen so that there was no significant difference in the mean estimated exon expression change between the tested exons and the complete set of exons that passed the criteria. The test exons selected (Supplementary Table 2) were among those flanked by constitutive exons according to cDNA and EST data or whose

flanking exons had small ( $(\Delta\Psi < 5\%$  or  $|LFC_{\text{gene}} - LFC_{\text{exon}}| < 0.1$ ) relative changes in exon expression level based on the mRNA-SEQ or array experiments. As negative controls, four exons were selected from the "non-target" set that had a small ( $(\Delta\Psi < 5\%$  or  $|LFC_{\text{gene}} - LFC_{\text{exon}}| < 0.1$ ) relative change in exon expression level. Primers were designed to target the flanking exons to amplify both exon inclusion and exon skipping isoforms (Supplementary Table 2).

Total RNAs used for the second batch of array experiments (H-KD arrays 2 and 3, control arrays 2 and 3) were used to perform the RT-PCR experiments. The reverse transcription (RT) reaction was carried out using SuperScript III (Invitrogen), followed by radioactive PCR (25 or 30 cycles of amplification depending on the gene expression level of the tested exon, with trace amounts of  $\alpha$ - $^{32}\text{P}$ -dCTP in addition to non-radioactive dNTPs). All RT-PCR reactions were run in duplicate. Quantitation of spliced isoforms was conducted as described previously<sup>1</sup>.

Supplementary Fig. 8a shows the comparison of the  $\Psi$  values based on RT-PCR and those estimated from the mRNA-SEQ. We defined positively validated H-responsive exons as those that 1) had at least one isoform with the expected size visible in each experiment; 2) showed increased relative abundance of exon skipping isoform in both biological H-KD experiments compared to the control experiments and 3) the mean relative abundance of the exon skipping isoform of the two H-KD experiments was at least 10% higher compared to that of the two controls. Among the 22 tested candidate H-responsive exons, 15 were validated by the RT-PCR experiments. Supplementary Table 2 shows the list of the 22 exons and their associated genes with the 15 validated ones noted. No significant change in exon inclusion was detected for the four negative control exons.

## Genomic Sequence Analysis



Genomic sequences of human (genome release hg18) and mouse (mm8) and alignments of human and mouse cDNA and EST sequences to the human genome and the mouse genome were obtained from the University of California Santa Cruz (UCSC) Genome browser (<http://genome.ucsc.edu>)<sup>2</sup>. Human and mouse skipped exons (SEs) and constitutive exons (CEs) were identified independently by using cDNA or EST transcript data specific to each organism. An exon present in at least one transcript was designated as an SE if it was excluded in one or more other transcripts. Exons with evidence of both skipping and alternative splice site usage were excluded. Exons that were not associated with evidence of skipping, alternative splice site usage, or intron retention were identified as CEs. Only exons flanked by canonical AG/, /GT terminal dinucleotides were included. Exons flanked by putative U12-type introns<sup>3</sup> were excluded. A minimum exon length of 30 bases and a maximum exon length of 300 bases were required. In addition, the flanking introns were required to be at least 50 bases long. The CEs and SEs were further filtered for internal exons based on human and mouse Ensembl gene annotations (release 40, August 2006)<sup>4</sup>. Orthologous exons were defined as those that are present in orthologous gene pairs obtained from Ensembl and whose splice sites were aligned according to the UCSC whole-genome alignment<sup>5</sup>. Alternative-conserved exons (ACEs) were defined as orthologous SEs with transcripts supporting exon skipping and inclusion in both human and mouse. Included-conserved exons (ICEs) were defined as orthologous CEs with transcripts supporting exon inclusion only in both human and mouse data. Overall, 15,256 human SEs, 13,162 mouse SEs, 91,045 human CEs, 90,449 mouse CEs, 2964 ACEs and 44,368 ICEs were identified.

Human SNP data were downloaded from dbSNP Build 128 (<ftp://ftp.ncbi.nih.gov/snp/>). As a quality filter, SNPs that mapped to multiple genomic regions or known repetitive elements were excluded. The remaining SNPs were mapped to the 5'ss region (-3, -2, ..., +6 positions

relative to the exon-intron boundary) of the 91,045 human CEs. Overall, 1482 human exons were identified to have 5'ss SNPs.

### **Conservation of G triplets**

The conservation of G triplets was analyzed in the downstream intronic region excluding the 5'ss (i.e. bases 11 to 70) of ICEs (Fig. 1a). The cutoff of 70 was used since the density of G-triplets, which peaks at about 20-30 nt downstream of the exon boundary (Supplementary Fig. 1a), is significantly reduced beyond this position compared to the more proximal regions to the 5'ss<sup>6</sup>. If the intron length was less than 140, only the region from base 11 up to half of the intron length was considered to avoid including sequences in the vicinity of the branch point and 3'ss. Scores of the 5'ss of each intron were calculated by MaxEnt log-odds scoring<sup>7</sup>. The introns were stratified according to their 5'ss scores in the human orthologs into 5 bins with the ranges of (0-4, 4-6, 6-8, 8-10, 10-12) bits. The numbers of introns in each bin (from lowest to highest 5'ss scores) were, respectively, 1106, 3153, 9295, 18532, 9961. (The small numbers of exons with 5'ss scores below 0 or above 12 bits were excluded.) Within each bin, the conservation rate (CR) of G-triplets was evaluated as follows. First, a conserved G-triplet occurrence was defined as an instance of the motif in the human genome that was aligned to the mouse genome and perfectly conserved in sequence in mouse in the UCSC whole-genome alignments. The CR of G-triplets was then calculated as the number of conserved occurrences divided by the total number of occurrences of the motif in the human intron regions considered. Next, an expected CR of G-triplets was calculated using a first-order Markov model. The expected CRs of all other trinucleotides were calculated similarly. Subsequently, two control 3-mers were chosen according to the following criteria: 1) same G+C frequency (100%) as in G-triplets; 2) same number (0) of CG dinucleotide as in G-triplets; 3) the least different expected CRs compared to that of G-triplets in each 5'ss bin;

4) absent from the RESCUE-ISE motifs (GGG and CCC) as previously identified<sup>6</sup>. The control CR for G-triplets was then calculated as the average CR of the two control 3mers. The ratio between the actual CR and the control CR for G-triplets (*i.e.*, observed/control) was then computed (Fig. 1a). The standard deviation of the CR ratio of G-triplets was calculated based on a binomial distribution with parameters  $N$ , the number of G triplets considered (in human), and  $p$ , the CR of G-triplets.

To evaluate the significance of G-triplet conservation in specific 5'ss bins, a bootstrapping approach was used to construct background sets of introns. Specifically, introns were randomly picked from each bin to reach a total of 500 occurrences of G-triplets in the human orthologs. Introns picked from all 5 bins were then pooled together to form one background set. The CR of G-triplet in the background set was calculated as described above. The bootstrapping procedure was repeated 1000 times. A P-value for high conservation of G-triplets in each bin was calculated as the fraction of times the actual CR ratio in the bin was lower than or equal to the background CR ratio and a P-value for low conservation of G-triplets was calculated as the fraction of times the background CR ratio was lower than or equal to the actual CR ratio. The P-values were then Bonferroni-corrected for multiple comparisons (*i.e.*, multiplied by 10).

### **mRNA-Seq data analysis**

mRNA-Seq reads (32 bases long) were mapped to the human genome (hg18) and spliced exon-exon junctions annotated in Ensembl genes (release 40, August 2006)<sup>4</sup>. The mapping was carried out using the ELAND (Efficient Alignment of Nucleotide Databases) module within the Illumina Genome Analyzer Pipeline software. Up to two mismatches were allowed in all mappings. Reads mapped to the splice junctions were required to match to at least 4 bases on each side of the junction, which we found is sufficient to ensure unique mapping in the vast majority of cases. To

be retained for downstream analyses, reads were required to map uniquely to the union of the genome and the transcriptome (i.e. including splice junctions). We obtained 22,594,112 and 30,385,240 reads in the control and H-KD experiments, respectively, of which 67% (15,092,536) and 65% (19,849,170) mapped uniquely to the genome, 5% (1,191,074 and 1,539,861) mapped uniquely to the splice junctions, and 21% (4,746,766) and 20% (6,086,971) mapped non-uniquely to the union of the genome and the transcriptome.

The genomic reads were then mapped to Ensembl exons (termed exon body reads). Exon body reads and exon junction reads were filtered to remove those that were mapped to overlapping sense and antisense Ensembl exons. Among the 273,858 Ensembl exons, about 65% (69%) were found to have exon body reads in the control (H-KD) data. Approximately 52% and 55% of all exons had exon junction reads in the control and H-KD data respectively.

In the study of the function of hnRNP H, we focused on exons that were either constitutive or alternatively skipped in the control or H-KD experiment. For each exon, we estimated the exon inclusion level (i.e.  $\Psi$ ) based on the number of mRNA-Seq reads. The value of  $\Psi$  was defined as (inclusion density / inclusion density + exclusion density), where inclusion density was computed as the read density of the exon and both exon inclusion junctions, and exclusion density was computed as the read density of the exclusion junction. Read density of each region was defined as the ratio of the number of reads mapped to the region divided by the total number of unique positions in the region, i.e. positions in the region that can generate 32mers which are unique in the genome. The rationale for this is that only those positions that are unique can have reads mapping uniquely to them. Following Laplace's Rule of Succession, we added a single pseudocount to the total number of reads, which was divided proportionally to the number of unique positions corresponding to exclusion and inclusion, respectively, e.g., the fraction  $N_{\text{exclusion}} / (N_{\text{exclusion}} + N_{\text{inclusion}})$  was added to the count of exclusion reads, where  $N_{\text{exclusion}}$  and  $N_{\text{inclusion}}$  are

the numbers of unique positions corresponding to exclusion and inclusion. For the functional studies of hnRNP H (Fig. 2) described in the following sections, we focused on "skippable" exons by requiring the exons to have at least one junction read supporting exon exclusion in at least one experiment.

Expression level of each gene/transcript (Supplementary Fig. 7a) was evaluated by calculating the gene read density, i.e. the total read counts for each Ensembl transcript normalized by the total number of unique positions in the transcript. In the comparison of gene expression levels of the control and H-KD experiments, the gene read densities were further scaled using the total number of reads obtained in each experiment.

### **Function of G-runs as ISEs**

In this section, we focus on the splicing activator function of hnRNP H, which has been associated with binding to G-runs in the intron downstream of the regulated exon<sup>8</sup>. One prediction of this function, as supported by the splicing reporter assays (Fig. 1c, Supplementary Figs. 3 and 4), is that splicing of an exon should be more strongly enhanced in the presence of longer (or more) G-runs in its downstream intron. Thus, in the mRNA-Seq data, exons with longer (or more) intronic G-runs are expected to have larger reductions in their inclusion levels following knockdown of hnRNP H. To investigate this aspect in our data, subsets of exons were extracted with different numbers of G's in runs G<sub>3</sub> or longer (G-runs) within bases +11 to +70 downstream of the 5'ss. Since exonic G-runs can function as hnRNP H-dependent silencers of splicing (see below), exons with more than 3 internal Gs in G-runs were excluded. Exons with more than 3 G's in G-runs in the upstream intronic regions (up to 150 nt from the 3'ss) were also excluded. The change in  $\Psi$  (control – H-KD) was then calculated for exons in the subsets. Figure 2a shows the average and standard error of this value for exons with 3-5, 6-8, 9-11, 12-14 and 15-17 Gs in G-

runs. As controls, exons with no intronic (within 70 bases from splice sites) or exonic G-runs were also analyzed (such exons are termed "non-targets"). Larger changes in  $\Psi$  were observed for exons with flanking G-runs conserved between human and mouse than for exons flanked by comparably sized G-runs not conserved in mouse (data not shown), suggesting that conserved G-runs are more often functional as ISEs.

To study the ISE activity of G-runs as a function of 5'ss strength, we focused on the set of exons (558 in total) with at least 6 G's in G-runs in the downstream intron (+11 to +70 bases) and no more than 3 exonic or upstream intronic G's in G-runs. We refer to these exons as "candidate H-activated exons". Among these exons, 136 had a  $\geq 20\%$  reduction in  $\Psi$  after H-KD and 28 had a  $\geq 20\%$  increase in  $\Psi$ , indicating a strong bias ( $p < 1e-10$ , Fisher's exact test) towards H-activated exons in this set, as expected.

Using the 558 candidate H-activated exons, the function of hnRNP H relative to 5'ss strength was investigated. Similar to the motif conservation analysis for G-triplets, the exons were stratified into 5 bins with the 5'ss score in the ranges of (0-4, 4-6, 6-8, 8-10, 10-12) bits. The change in  $\Psi$  following H-KD (control – H-KD) was calculated for exons in each bin. The corresponding change in  $\Psi$  was also calculated for the "non-target" exons in each bin. Figure 2b shows the exon inclusion change (mean and SE) of the H-activated exons relative to that of the non-target exons (observed – expected, O-E) in each bin.

To evaluate whether certain bins have a statistically higher or lower change in exon inclusion than other bins, a sampling procedure was carried out to control for 5'ss strength and enrichment of G's in G-runs. For example, if there were  $N$  exons in bin  $X$ , then  $N/4$  exons were randomly picked from each of the other 4 bins to form a control set of exons. To control for effects of G-run length, the random sampling algorithm was designed so that the  $N$  control exons

and the  $N$  bin- $X$  exons were matched in the total number of downstream intronic Gs in G-runs. In this analysis, exons in bin  $X$  whose number of G's did not match at least 4 exons in the other bins were excluded. The sampling procedure was repeated 1000 times and the average relative exon inclusion levels of the bin- $X$  exons were compared with that of the control exons to obtain a P value. Exons in each bin were analyzed similarly. The P-values were Bonferroni corrected for multiple comparisons (i.e. multiplied by 10).

No consistent dependence of G-run ISE activity on 3'ss strength was seen based on the mRNA-Seq data (Supplementary Fig. 4d) or the reporter data (Supplementary Fig. 4a), and no correlation was observed between the 5'ss and 3'ss strength of constitutive exons ( $R = -0.029$ , Supplementary Fig. 4c). This absence of correlation indicates that the activity of downstream intronic G-run is not expected to be dependent on the 3'ss strength as a result of its dependence on the 5'ss strength.

The function of G-run ISEs was also largely unaffected by initial inclusion levels of exons. In the splicing reporter analyses, the 5'ss strength dependence of G-run ISE activity was robust to changes in "initial" exon inclusion level – i.e. prior to G-run insertion – except when the initial level was so high (e.g.,  $\geq 95\%$ ) as to preclude additional enhancement (Supplementary Fig. 3a). For example, pairing of an intermediate 5'ss with 2.1 bit and 4.1 bit 3'ss yielded initial inclusion levels of 10% and 54%, respectively. However, the mean change in exon inclusion per inserted G triplet for these two reporters was not significantly different, at 17% and 20%, respectively, indicating additive contribution to exon inclusion independent of initial inclusion level (Supplementary Fig. 3a). Based on the mRNA-Seq data, the initial inclusion level also did not significantly influence inclusion level changes following H-KD (Supplementary Fig. 3b).

## **Function of G-runs as ESSs**

In this section, we focus on the splicing silencer function of hnRNP H associated with binding to G-runs in the exons<sup>9</sup>. To investigate the ESS function relative to G-run lengths, we extracted subsets of exons with different minimum number of G's in G-runs in the exons and no more than 3 G's in G-runs in the flanking intronic regions defined above. The change in  $\Psi$  (control – H-KD) was then calculated for exons in the subsets. Figure 2d shows the average and standard error of this value for exons with 3-5, 6-8, 9-11 and 12-14 Gs in G-runs.

To study the function of G-runs as ESSs, we focused on the set of exons (167 in total) with at least 6 G's in G-runs in exon. We refer to these exons as "candidate H-repressed exons". Among these exons, 44 had a  $\geq 20\%$  increase in  $\Psi$  after H-KD and 21 had a  $\geq 20\%$  reduction in  $\Psi$ . Thus, there was a bias ( $p = 0.002$ , Fisher's Exact test) towards derepression following H-KD, as expected. These 167 exons were grouped by their 5'ss scores and their relative changes in exon inclusion level (Fig. 2d) were evaluated similarly as for the candidate H-activated exons.

### **Exon array data analysis**

The raw intensity data (CEL files) of exon arrays obtained from Affymetrix GeneArray Scanner were processed using the Affymetrix Power Tools (APT, see <http://www.affymetrix.com/support/developer/powertools/index.affx>). The apt-cel-transformer program was used to carry out RMA background correction and quantile normalization of the probe intensities. The exon array probes were mapped to Ensembl genes and exons using the custom CDF files<sup>10</sup> (version 9). The R package "affy"<sup>11</sup> (version 1.14.1) was then used to obtain probe intensity values from the processed CEL files. The gene-level expression values were calculated by summarizing the RMA and quantile-processed probe intensities of core probes



mapped to each gene in the custom CDF file using the median polish method<sup>12</sup> implemented in "affy".

Since two slightly different RNAi protocols were used, the array data were analyzed in a pairwise manner by pairing H-KD and control arrays completed with the same protocols. To detect exons differentially expressed in the control arrays and H-KD arrays, the probe intensity values of each gene were processed as follows. First, probes were discarded if associated with probe or gene log intensity values of less than 6 on the control arrays. This cutoff was chosen based on the poor correlation of probes with log intensities below 6 between the control arrays (data not shown). About 80% antigenomic and genomic background probes (negative controls) had log intensities below 6. Exons with 2 or more probes passing this filter were retained for further analysis. Next, the difference of probe intensity values ( $\Delta_{\text{probe}} = \log_2(\text{H-KD}) - \log_2(\text{control})$ ), i.e., log-fold change or LFC) between the H-KD and control arrays was calculated for each probe and each control/H-KD array pair. The median  $\Delta_{\text{probe}}$  value of all probes mapped to an exon in the 3 pairs of array experiments was used to calculate log-fold change in exon expression ( $\text{LFC}_{\text{exon}}$ ). Similarly, the median of the differences of gene intensity values between H-KD and control arrays was used to calculate  $\text{LFC}_{\text{gene}}$ . Thus, exons with a differential expression in the H-KD and control experiments could be identified as those with a large difference between  $\text{LFC}_{\text{exon}}$  and  $\text{LFC}_{\text{gene}}$  values (see below).

Similar to the analysis of the mRNA-Seq data, the exons were grouped according to the number of G's in G-runs in the downstream introns. The relative change in exon expression levels  $\text{LFC}_{\text{gene}} - \text{LFC}_{\text{exon}}$  obtained from the array experiments were then calculated for the subsets of exons and the non-target exons. The results are shown in Supplementary Fig. 7 together with the mRNA-Seq results.

To analyze the function of intronic G-runs relative to 5'ss strength with the array data, we used the set of exons (4200 in total) with at least 9 G's in G-runs. ( $G_9$  was required instead of  $G_6$  as for the mRNA-Seq data since  $G_6$  showed only slightly functional increase than  $G_3$  in the array data in Supplementary Fig. 7.) In this dataset, 315 exons had a relative reduction in expression level ( $LFC_{\text{gene}} - LFC_{\text{exon}}$ ) of 0.5 on a  $\log_2$  scale (i.e.,  $\sim 30\%$ , illustrated by the lower red dotted line) or more. In contrast, 117 exons were detected with an increase in relative expression level of at least 0.5 ( $P < 1e-10$ ). These exons were analyzed similarly in different 5'ss bins as for the mRNA-Seq data (Supplementary Fig. 7).

The function of exonic G-runs was not analyzed using the array data due to smaller data sets and reduced data quality (e.g., a "dose-response" in the function of splicing silencing was not observed for exonic G-runs based on the array data).

### **Genetic variation in splice sites**

In Fig. 3b, the fraction of human CEs with SNPs in the 5'ss (last 3 bases of exon and first 6 bases of intron) was analyzed. The data were grouped into subsets (test exons) associated with different numbers of G-runs (within 70 bases downstream from the 5'ss). As controls, exons with no G-runs were randomly sampled to match the following features: (i) number of CpGs in the 5'ss sequences; (ii) C+G content of 5'ss sequences (differing by  $\leq 1$  out of 9 bases); (iii) 5'ss score (differing by  $\leq 2$  bits); (iv) intronic C+G frequency (differing by  $\leq 20\%$ ). These quite stringent controls were imposed to ensure that such background features do not bias SNP density. Fig. 3b shows the ratio between the fraction of exons with 5'ss SNPs in test exons and that in control exons. Error bars were calculated by assuming a binomial distribution with parameters  $N$ , the number of exons analyzed and  $p$ , the fraction of exons with 5'ss SNPs in the test exons. In-frame and out-of-frame exons were analyzed separately for those with at least 6 G's in G-runs.

In Fig. 3c, the change in 5'ss score was analyzed for subsets of ICEs (test exons) with different numbers of G-runs (between bases +11 to +70 downstream from the 5'ss). In each subset, the number of G-runs was required to be conserved between the human and mouse orthologs. As controls, exons with no G-runs were used. Control exons were randomly sampled to match the following sequence features of the test exons (average values of all features in human and mouse orthologs were used): (i) number of CpG in the 5'ss sequences; (ii) intronic C+G frequency (differing by  $\leq 0.1$ ); (iii) MaxEnt 5'ss score (differing by  $\leq 2$  bits); (iv) intronic sequence conservation (PhastCons scores averaged for the 11-70 base positions of an intron, differing by  $\leq 0.1$ ); (v) 5'ss C+G frequency (within the same range, either  $\geq 0.35$  or  $< 0.35$ ). These stringent controls we used to ensure that such background features do not bias the difference in 5'ss scores between human and mouse orthologs. Fig. 3c shows the ratio between the mean 5'ss score difference in test exons and that in control exons. Error bars represent the standard errors of the change in 5'ss scores associated with the set of the test exons.

### **Evolution of splicing phenotype of exons with G-run ISEs**

Orthologous human/mouse exons were analyzed for the relationship between presence of conserved G-runs and evolutionary change in splicing pattern (constitutive splicing in human and alternative splicing in mouse). To ensure reliable identification of constitutive splicing, the set of candidate human CEs were filtered further based on Illumina high-throughput transcriptome sequencing data from 10 diverse human tissues<sup>13</sup>, and exons flanked by (or overlapping with) alternative splice junctions in any tissue in the Solexa data were excluded. Among the original 91,045 candidate human CEs, 71,235 exons passed this filtering step. These human CEs were aligned to mouse exons based on the UCSC whole-genome alignment. Overall, 36,240 exons were aligned to mouse CEs or SEs that have EST or cDNA support. In this data set, 1,796 exons were

constitutively spliced in human but alternatively skipped in mouse. Exons categorized as CEs in mouse but as SEs in human were not analyzed because the somewhat lower number of EST sequences available from mouse (and the absence of Solexa transcript data) would make it difficult to reliably identify a set of mouse CEs not contaminated by unrecognized SEs.

Exon boundaries of the human/mouse orthologous exons (36,240 in total) were aligned to the genomes of 16 other placental mammals included in the UCSC 28-way whole genome alignment<sup>5</sup>. The presence of G-runs in the downstream introns (within 70 nt from the 5'ss) of aligned exons was calculated in each genome. If the G-run was present (not necessarily in aligned positions) in at least 10 of the 16 genomes, then it was designated as 'present' in the last common ancestor (LCA) of the organisms considered. On the other hand, if the G-run was absent from at least 10 of the 16 genomes, then it was considered as 'absent' from the LCA. In total, 15,609 (8957) test exons were identified as having at least 3 (6) G's in G-runs, and 22,205 control exons were identified.

To study the evolution of splicing phenotypes related to G-run ISEs, we asked the question of whether exons with ancestral G-runs in downstream introns were more likely to have different splicing phenotypes in human and mouse (i.e., constitutive in human, alternative in mouse) compared to those lacking ancestral G-runs. In Fig. 3d, the fraction of exons that were constitutively spliced in human but alternatively spliced in mouse among all exons with ancestral G-runs was analyzed for subsets of data (test exons) with different numbers of ancestral G-runs, compared to the set of exons with no ancestral G-runs (control exons). To account for potential biases in EST/cDNA coverage of mouse genes, the control exons were sampled randomly to match the transcript coverage of the test and control genes by requiring the number of transcripts per kbp of mRNAs to differ by less than 0.2. In addition, the C+G frequency and conservation level of the introns (70 nt downstream from the 5'ss, averaged among all genomes for each intron)

were controlled for. The C+G frequency was required to differ by less than 5%. Since the conservation of G-run ISEs was determined in this instance based on presence of the G<sub>3</sub> motif in the 70 nt intronic region without requiring alignments, the overall conservation level of introns was calculated analogously, by averaging the 'conserved occurrence rate' (COR) of each 3-mer<sup>1</sup>. The control data and test data were matched by requiring their average COR values to differ by less than 0.1. Figure 3e shows the ratio between the fraction of test exons that are constitutively spliced in human but alternatively skipped in mouse and this fraction in control exons in subsets with different number of ancestral G-runs. Error bars were calculated by assuming a binomial distribution with parameters *N*, the number of test exons, and *p* the fraction of test exons that were CEs in human and alternatively spliced in mouse. In-frame and out-of-frame exons were analyzed separately for those with at least 6 G's in G-runs.

Exons with internal G-runs were analyzed analogously (Fig. 3e) by controlling for the EST/cDNA coverage, exonic G+C frequency and conservation level.

### **Gene ontology analysis**

Genes containing exons detected as downregulated following H-KD (404 exons with at least 9 G's in G-run in the downstream intron and with either a  $\geq 20\%$  reduction in exon inclusion in the mRNA-Seq or a LFC of 0.5 or more in the array data) were analyzed for enrichment of GO categories. Genes containing the "non-target" exons (*N* = 4184) defined previously were used as controls. A total of 350 test genes and 1099 control genes were identified, excluding genes that belonged to both groups. GO identifiers (IDs) for each gene were obtained from EnsMart (Ensembl release 40, August 2006, <http://www.ensembl.org>). Function and process ontologies for all genes were obtained from <http://www.geneontology.org>. In addition to the GO IDs annotated by Ensembl, all general "parent" GO categories within the "Molecular Function" and "Biological

Process” ontologies were assigned to each gene. Since conservation of G-triplets was used in defining the set of candidate H-activated exons, we controlled for gene conservation level in the test genes and control genes. The candidate H-activated exons (genes) have, essentially by definition, high C+G content. Thus, the C+G frequency of the test and control genes was not controlled. However, the number of exons in each gene was controlled considering the higher probability to identify an exon as a H-activated candidate in genes with more exons. Specifically, for each GO category, the fraction of genes in the test set ( $F_{test}$ ) associated with this category was calculated. Then, a total of 350 genes were selected randomly from the control set to achieve a one-to-one match with the test genes in terms of average phastCons conservation score<sup>14</sup> and number of exons (allowing phastCons scores to differ between the test and control gene pairs by no more than 5% of the range across all genes, and requiring exact match of number of exons). Then, the fraction of genes in this randomly selected control set ( $F_{control}$ ) associated with the current GO category was calculated. This random sampling process was repeated 10,000 times. The P value for enrichment of each GO category in the set of test genes was then calculated as the fraction of times that  $F_{test}$  was lower than or equal to  $F_{control}$ . Supplementary Table 6 lists the GO categories identified in this analysis (P < 0.001), with those passing the Bonferroni cutoff (1/total number of GO categories considered) shown in bold.

Genes rich in intronic G-runs were selected from Ensembl-annotated genes using the criterion that  $\geq 50\%$  of introns contain at least 9 Gs in G-runs within 70 bp of the 5'ss. A total of 3220 genes passed this criterion. The set of genes (12,504 in total) with no intronic G-runs within 70 bp of the 5'ss were used as controls. GO categories enriched in the set of genes with G-runs were identified by comparing the number of genes in this data set and that in the set of controls using the Chi-square test. Supplementary Table 6 lists the GO categories identified in this analysis

( $P < 0.001$ ), with those passing the Bonferroni cutoff ( $1/\text{total number of GO categories}$  considered) shown in bold.

### **Sequence motif analyses**

For the analyses described in Fig. 4, the conservation rate (CR) of 4-mers and 5-mers in the downstream intronic regions of ICEs was calculated similarly as for G-triplets. The expected CR of each motif was also calculated using first-order Markov models. A control CR was then computed for each motif (test kmer) in each 5'ss group as the average CR of 10 control kmers with the same length. The control k-mers were chosen according to the following criteria: 1) same G+C frequency as in the test k-mer; 2) same number of CG dinucleotide; 3) the least different expected CRs compared to that of the test k-mer. For motif discovery, since we sought to identify motifs with function in introns, and the subset with functional difference in different 5'ss ranges, a two-step procedure was used to evaluate the statistical significance. First, we required a minimum level of conservation above background (represented by the control CR) in at least one 5'ss group using a motif conservation score (MCS) similar to that described by <sup>15</sup>. The MCS is essentially a z-score calculated using the actual CR and the control CR of each kmer. Second, to test whether a motif was more conserved in one 5'ss group than another, a t-statistic for the difference between the excess conservation rate (actual relative to control) of the motif in two different 5'ss groups was determined. Statistical significance was assessed using shuffled datasets generated by randomly permuting the 5'ss scores between exons. Specifically, a MCS cutoff was determined to allow 5% of the motifs to pass the first step of the test in the shuffled data and a t-statistic cutoff was determined to allow 1% of the motifs to pass the second step of the test independent of the first test in the shuffled data.

The above analyses (including data randomization) were conducted separately using intronic windows 11-70 and 11-200, for motif lengths 4 and 5, and for ACEs and ICEs. ACEs were grouped into 5'ss bins in the ranges of 0-4, 4-8 and 8-12 bits. The number of introns in each bin (from lowest to highest 5'ss score) was, respectively, 219, 996, and 1314. In consideration of the larger data size of ICEs and the smaller difference in intron conservation profiles across 5'ss groups (Fig. 4a), ICEs were grouped into 5'ss bins with a step of 2 bits (0-2, 2-4, ..., 8-12). The number of introns in each bin (from lowest to highest 5'ss score) was, respectively, 243, 863, 3153, 9295, 18532 and 9961. To reduce the number of comparisons, each 2-bit bin was compared to a 4-bit bin in a different 5'ss strength category, i.e., 0-4 defined as weak 5'ss, 4-8 as intermediate 5'ss and 8-12 as strong 5'ss, in the second step of the statistical procedure. The shuffled data were used to estimate the false discovery rate for motifs passing the statistical tests as ~20%. Representative 5mer analyses for ICEs (with window 11-70) and for ACEs (with window 11-200) are shown in Fig. 4, with full results shown in Supplementary Table 7.

To assess whether other exonic motifs may have 5'ss strength-dependent activity, analyses of sequence conservation were performed, using the improved method that was used for intronic motifs (Fig. 4), as described below. In brief, we searched for 4mer and 5mer motifs whose conservation level differed significantly (compared to randomly shuffled data) between two 5'ss groups in at least 2 out of the 3 reading frames (based on Ensembl annotation) at  $P < 0.01$ . Only one 5mer (UACAG) passed this test. UACAG was observed to be most significantly conserved in the very weak (0-2 bits) 5'ss group of ICE exons. This 5mer is contained in one of the RESCUE-ESE 6mers<sup>16</sup>, UACAGA, suggesting possible ESE activity. Therefore, activity of at least one exonic SRE may also depend on 5'ss strength.

## **CLIP-Seq analysis**



We have adapted standard CLIP protocols<sup>17</sup> to isolate RNA bound by hnRNP H in vivo. HEK 293T cells were grown to confluence and UV irradiated at 400 mJ/cm<sup>2</sup>. Total protein was isolated using RIPA buffer (50 mM Tris-HCl pH 7.4, 0.1% Na-deoxycholate, 1% NP-40). Lysate was treated with DNase I and dilute RNase A (Fermentas). Immunoprecipitation of hnRNP H was performed using rabbit polyclonal anti-hnRNP H antibodies (Bethyl labs, A300-511A) that were pre-conjugated to protein A beads (Invitrogen). IP'd protein-RNA complexes were washed with RIPA buffer, treated with alkaline phosphatase, and ligated to the Illumina 3' end small RNA adapter. The complexes were subsequently radiolabeled with P32-ATP using T4 PNK, and electrophoresed on a NuPage Bis-Tris SDS-PAGE gel (Invitrogen). Protein-RNA complexes were transferred to nitrocellulose and exposed to film. Protein-RNA complexes from bands excised between 50 and 80 kD, in increments of ~7 kD, were proteinase K treated. RNA was eluted and precipitated, and RNA of length 40-60 nucleotides was ligated to the Illumina 5' end small RNA adapter. Reverse transcription was performed using a primer complementary to the 3' adapter, and 35 cycles of PCR was performed using the Illumina small RNA PCR primers. PCR products of length ~125-175 nucleotides were gel purified and sequenced on an Illumina 1G Genome Analyzer.

Thirty-two base-pair long sequences were aligned to the human genome build hg18 and transcript junction database<sup>13</sup> using Bowtie<sup>18</sup>, with parameter settings allowing for up to 2 mismatches in the seed region (first 28 nucleotides). Other analyses were performed using Python scripts.

### **Equilibrium model of splicing element evolutionary dynamics**

To understand the evolutionary implications of splicing enhancement by ISEs generally and of the type of 5'ss strength-dependent activity observed for G-run ISEs specifically, we developed

models of the evolutionary dynamics of splicing *cis*-elements in the evolution of constitutive exons, which capture essential features of this system. Supplementary Fig. 10 illustrates specific instance of the model, including cases in which: (a) ISEs have no activity; (b) ISEs have activity independent of 5'ss strength; and (c) ISE activity is higher in the context of intermediate 5'ss strength. In each model, three types of splicing *cis*-elements are included: 5'ss, ISE and 3'ss. In some cases we can also consider the third variable as encompassing the 3'ss and other positive-acting *cis*-elements not explicitly listed (e.g., exonic splicing enhancers). In these examples, we assume that the 5'ss and 3'ss elements each have three possible discrete values (0, 5 and 10) and ISEs have two states (absent, present) which are associated with two (0 and 5) or three (0, 5, and 10) distinct values. Each box (node) in the network corresponds to exons which have a specific combination of scores of the three elements (members in the box are, from left to right, scores of 5'ss, ISE, and 3'ss). A minimum cutoff of 20 was used for the total score of one state.

Up to the relevant minima/maxima, elements in each state may acquire strengthening or weakening mutations. The ratio of motif-weakening to motif-strengthening mutations is represented in the model by the parameter  $k$ . The value of  $k$  is expected to always exceed one since random mutations more often reduce information (increase entropy) by disrupting/weakening motifs than the reverse. The rate of strengthening mutations is  $p$ , so that the rate of motif weakening mutations is  $kp$ . For simplicity, the same values of  $k$  and  $p$  are assumed for all types of score changes (i.e.  $10 \leftrightarrow 5$ ,  $5 \leftrightarrow 0$ ). This assumption does not qualitatively affect the conclusions given below. Because the absolute rate of mutations per position per generation is generally very small, multiple mutations, *i.e.*, transitions between states that differ in more than one element, or by a score increment of more than 5, were not considered. Therefore, only 'point mutations' – changes in the score of a single element by 5 units – were considered.

The above model is essentially Markov in character. As in general Markov models, the following assumptions were made: (i) neighbor independence: each splicing element mutates randomly and independently of each other; (ii) history independence: the probability of mutation at each state only depends on the present state (and not on its history); and (iii) element independence: the probability of mutating from one state to another depends only on the information content (score) of the two states, and not on the specific splicing element involved (note that we have assumed uniform  $k$  and  $p$  values). For such a Markov model, as long as any state can be reached from any other through a finite series of steps with positive probability, the existence and uniqueness of the equilibrium ('steady-state' or stationary) distribution is assured. The equilibrium frequency of each state in the networks can be solved using  $N$  (where  $N$  is the total number of states) equations representing the balance of the outgoing and incoming mutational flux at each state. Here, 5'ss flux is defined as the probability of changes in the 5'ss between two states (i.e., current state frequency mutation rate of 5'ss from current state to the next). For example, the equations describing the flux equilibrium at the states (labeled as 1, 2, ..., 6) in Supplementary Fig. 10a are:

| State | Incoming flux | Outgoing flux |
|-------|---------------|---------------|
| 1     | $bkp+cp+ep$   | $= ap+2akp$   |
| 2     | $ap+dp+fp$    | $= 3bkp$      |
| 3     | $akp+dkp$     | $= 2cp$       |
| 4     | $bkp+cp$      | $= dkp+dp$    |
| 5     | $akp+fkp$     | $= 2ep$       |
| 6     | $bkp+ep$      | $= fp+fkp$    |

where  $a, b, \dots, f$  are the equilibrium frequencies of states 1, 2, ..., 6, respectively.

The values of  $a, b, \dots, f$  can be solved from the above equations as:  $a = kD, b = D, c = k^2D, d = kD, e = k^2D$  and  $f = kD$ , where  $D = 1/(2k^2+3k+1)$ . Indeed, in a Markov model satisfying conditions (i)-(iii) above, if the equilibrium frequency of the node with highest total score (the root

node, state 2 in Supplementary Fig. 10a) in the network is designated  $q$  (in Supplementary Fig. 10a,  $D=q$ ), then nodes that are one mutation away from the root node have an equilibrium frequency of  $kq$ , nodes that are two mutations away from the root node have an equilibrium frequency of  $k^2q$ , and so on. This property guarantees that the network flux in the two directions along any network edge are balanced (also known as 'detailed balance'), i.e., the mutation flux from node  $x$  to  $y$  is equal to the mutation flux from  $y$  to  $x$ .

Next, the overall network flux associated with each type of splicing element can be calculated as the total network flow (sum of state frequency  $\times$  mutation rate values) associated with this element in the entire network. For example, the 5'ss flux (edges marked by red blocks) in Supplementary Fig. 10a is calculated as:  $akp+cp+bkp+dp = 2kp/(2k+1)$ .

To compare the 5'ss fluxes in the three models, we introduce a variable of 'flux per exon' (FPE) for each node layer (node layers and edge layers are illustrated in Supplementary Fig. 10). 5'ss FPE of node layer  $N_i$  is defined as the 5'ss flux between node layer  $N_i$  and  $N_{i-1}$  normalized by the total number of exons in node layer  $N_i$ . In Supplementary Fig. 10, the 5'ss FPE of each node layer is shown, where FPE of node layer  $N_i$  is essentially  $p^*(\text{number of edges in either direction in } E_i \text{ with 5'ss flux between } N_i \text{ and } N_{i-1} / \text{number of nodes in layer } N_i)$ . Importantly, the 5'ss FPE for any node layer with non-zero probability is invariant across the three models in Supplementary Fig. 10. Comparing Supplementary Figs. 10a and b, it can be appreciated that due to the existence of an extra node layer in Supplementary Fig. 10b, the distribution of exons in 10a is expanded to populate the extra node layer. Because the 5'ss FPE associated with the new layer is larger ( $4p/3$ ) vs.  $p$ , the 5'ss flux is larger in Supplementary 10b than in 10a. Similarly, comparing Supplementary Figs. 10b and c, the 5'ss flux is larger in 10c because of the shift of exons to the new node layer ( $N_3$ ) and a larger 5'ss FPE value of  $2p$  associated with this layer.

Supplementary Fig. 10 shows the formulas for total 5'ss flux and 3'ss flux associated with the three models. Due to the symmetry of the 5'ss and 3'ss scores, the fluxes of these two variables are the same for all three models. Supplementary Fig. 10d illustrates the flux values calculated for different values of  $k$ . A higher 5'ss (3'ss) flux value was observed for the ISE-independent model compared with the ISE-inactive model, while the flux is the highest in the ISE-dependent (i.e. 5'ss strength-dependent) model compared with the other two models. In these models, the 3'ss flux changes in the same pattern as the 5'ss flux, even in the ISE-dependent model where the ISE activity is dependent on 5'ss strength but not 3'ss strength. This is an indirect effect as a result of tolerance to 3'ss mutations when the overall splicing strength of the exon is higher due to the increased activity of ISEs in the context of certain 5'ss scores (for example, refer to the network flow between [5, 10, 10] and [5, 10, 5] in Supplementary Fig. 10c). Asymptotically (in the value of  $k$ ), the 5'ss flux of the ISE-inactive model is  $O(p)$ , while that of the ISE-independent and ISE-dependent models are  $O(1.2p)$  and  $O(2p)$ , respectively.

Analyses of more complicated models (e.g., containing more discrete values for splicing element scores) invariably yielded the same conclusion that in general presence of ISEs leads to increased splice site flux and models with higher activity for ISEs associated with intermediate 5'ss strength give higher 5'ss flux than those with 5'ss strength-independent activity. In general, if the network nodes are arranged so that all nodes that differ by one single point mutation from the highest-scored node are in layer 1, and all those that differ by two point mutations are in layer 2, etc., and if the layers being considered are complete (i.e., if all combinations of *cis*-element scores in the layers exceed the minimum cutoff), then the FPE of layer  $I$  can be expressed as:

$$2 \sum_{j=1}^{I-1} \binom{n}{j} \binom{I-2}{j-1} / \sum_{j=1}^I \binom{n}{j} \binom{I-1}{j-1}, \text{ where } n \text{ is the number of types of } cis\text{-elements involved in the}$$

model and terms  $\binom{n}{j}$ , etc. have their the standard combinatorial definitions. Solved numerically, as  $I$  increases, the FPE value also increases for  $n$  in the range of 2-500. We expect this conclusion will hold generally, i.e. that FPE increases for successively lower layers. As discussed above, the equilibrium probability of nodes in each layer also increases as  $I$  increases (since  $k$  increases). Thus, the total 5'ss or 3'ss flux should also increase as more layers are included in the model.

Though we have not yet determined the precise set of conditions, in cases when the node layers are not complete (i.e., some nodes have total score below the threshold), higher splice site flux tends to occur in the ISE-active model than the no-ISE model whenever the ISE-active model contains extra states associated with splice site flux, i.e. whenever ISEs afford a greater diversity in the strength of other splicing elements. Similar considerations appear to be sufficient for having greater splice site flux in the 5'ss strength-dependent versus 5'ss strength-independent model as well.

The above models and discussions also apply to networks involving exonic splicing silencers (ESSs). Opposite to the ISE-containing models, the no-ESS model is generally associated with higher splice site flux than the ESS-independent model (where the ESS activity is independent of the 5'ss) whenever the no-ESS model contains extra states associated with splice site flux, or the ESS-independent model contains extra states un-associated with splice site flux. Similarly, ESSs with splice site strength dependent activities as discussed for G-runs in the exons, i.e., higher ESS activity for exons with strong 5'ss, but less ESS activity in the context of intermediate 5'ss, tend to enable more splice site flux than ESSs independent of 5'ss since they often afford extra states associated with splice site flux. The difference between the splice site flux in the no-ESS model and the ESS-dependent model depends on the specific extent of the 5'ss

strength-dependent function of the ESS which determines the gain or loss of states associated with splice site flux.

### Supplementary References

1. Wang, Z., Xiao, X., Van Nostrand, E. & Burge, C.B. General and specific functions of exonic splicing silencers in splicing control. *Mol Cell* **23**, 61-70 (2006).
2. Karolchik, D. et al. The UCSC Genome Browser Database. *Nucleic Acids Res* **31**, 51-4 (2003).
3. Burge, C.B., Padgett, R.A. & Sharp, P.A. Evolutionary fates and origins of U12-type introns. *Mol Cell* **2**, 773-85 (1998).
4. Birney, E. et al. Ensembl 2006. *Nucleic Acids Res* **34**, D556-61 (2006).
5. Miller, W. et al. 28-Way vertebrate alignment and conservation track in the UCSC Genome Browser. *Genome Res.*, gr.6761107 (2007).
6. Yeo, G., Hoon, S., Venkatesh, B. & Burge, C.B. Variation in sequence and organization of splicing regulatory elements in vertebrate genes. *Proc Natl Acad Sci U S A* **101**, 15700-5 (2004).
7. Yeo, G. & Burge, C.B. Maximum entropy modeling of short sequence motifs with applications to RNA splicing signals. *J Comput Biol* **11**, 377-94 (2004).
8. Marcucci, R., Baralle, F.E. & Romano, M. Complex splicing control of the human Thrombopoietin gene by intronic G runs. *Nucl. Acids Res.* **35**, 132-142 (2007).
9. Chen, C.D., Kobayashi, R. & Helfman, D.M. Binding of hnRNP H to an exonic splicing silencer is involved in the regulation of alternative splicing of the rat beta-tropomyosin gene. *Genes Dev* **13**, 593-606 (1999).
10. Dai, M. et al. Evolving gene/transcript definitions significantly alter the interpretation of GeneChip data. *Nucleic Acids Res* **33**, e175 (2005).
11. Gautier, L., Cope, L., Bolstad, B.M. & Irizarry, R.A. affy--analysis of Affymetrix GeneChip data at the probe level. *Bioinformatics* **20**, 307-15 (2004).
12. Irizarry, R.A. et al. Exploration, normalization, and summaries of high density oligonucleotide array probe level data. *Biostatistics* **4**, 249-64 (2003).
13. Wang, E.T. et al. Alternative isoform regulation in human tissue transcriptomes. *Nature* **456**, 470-6 (2008).
14. Siepel, A. et al. Evolutionarily conserved elements in vertebrate, insect, worm, and yeast genomes. *Genome Res* **15**, 1034-50 (2005).
15. Xie, X. et al. Systematic discovery of regulatory motifs in human promoters and 3' UTRs by comparison of several mammals. *Nature* **434**, 338-45 (2005).
16. Fairbrother, W.G., Yeh, R.F., Sharp, P.A. & Burge, C.B. Predictive identification of exonic splicing enhancers in human genes. *Science* **297**, 1007-13 (2002).
17. Ule, J., Jensen, K., Mele, A. & Darnell, R.B. CLIP: a method for identifying protein-RNA interaction sites in living cells. *Methods* **37**, 376-86 (2005).
18. Langmead, B., Trapnell, C., Pop, M. & Salzberg, S.L. Ultrafast and memory-efficient alignment of short DNA sequences to the human genome. *Genome Biol* **10**, R25 (2009).
